# Supplementary material for: Next-Generation Sequencing of Translocation Renal Cell Carcinoma Reveals Novel RNA Splicing Partners and Frequent Mutations of Chromatin-Remodeling Genes
Source: Oxford University Press journal article supplement (doi:10.1158/1078-0432.ccr-13-3036), 2014-06-04
Supplement: 10780432ccr133036-sup-tab4.xlsx [file 10780432ccr133036-sup-tab4.xlsx]

## Sheet: Table S4
clusters	pid	samID	htseqFile	type	numFusion	isFusion	intraFus	interFus	chrom	fusionGene	is reported translocation	isXp11Tr	bcr_patient_barcode	age_at_initial_pathologic_diagnosis	anatomic_organ_subdivision	days_to_birth	days_to_death	days_to_form_completion	days_to_initial_pathologic_diagnosis	days_to_last_followup	days_to_last_known_alive	distant_metastasis_pathologic_spread	eastern_cancer_oncology_group	erythrocyte_sedimentation_rate_result	gender	hemoglobin_result	histological_type	icd_10	icd_o_3_histology	icd_o_3_site	informed_consent_verified	karnofsky_performance_score	lactate_dehydrogenase_result	laterality	lymphnode_pathologic_spread	lymphnodes_examined_prior_presentation	number_of_lymphnodes_examined	number_of_lymphnodes_positive	performance_status_scale_timing	person_neoplasm_cancer_status	platelet_qualitative_result	pretreatment_history	primary_tumor_pathologic_spread	prior_diagnosis	serum_calcium_result	tissue_source_site	tumor_grade	tumor_stage	tumor_tissue_site
1	3307	K330701A	K330701A.htseq.txt	tumor	0	No	0	0				FALSE	TCGA-A3-3307	66	null	-24319	NA	1828	0	1436	1436	M0	NA	NA	MALE	NA	Kidney Clear Cell Renal Carcinoma	NA	8310/3	C64.9	YES	NA	NA	Right	N0	YES	NA	NA	NA	WITH TUMOR	NA	NO	T3b	YES	NA	A3	G3	Stage II	KIDNEY
2	3308	K330801A	K330801A.htseq.txt	tumor	0	No	0	0				FALSE	TCGA-A3-3308	77	null	-28274	NA	1385	0	16	16	M0	NA	NA	FEMALE	Normal	Kidney Clear Cell Renal Carcinoma	NA	8310/3	C64.9	YES	NA	NA	Right	N0	NA	NA	NA	NA	TUMOR FREE	Normal	NO	T3b	NO	Normal	A3	G2	Stage II	KIDNEY
3	3311	K331101A	K331101A.htseq.txt	tumor	1	Yes	1	0	6	NFKBIE_SLC29A1	No	FALSE	TCGA-A3-3311	58	null	-21185	1190	1922	0	1190	743	M0	NA	NA	MALE	Low	Kidney Clear Cell Renal Carcinoma	NA	8310/3	C64.9	YES	NA	NA	Right	NX	NA	NA	NA	NA	TUMOR FREE	NA	NO	T1	NO	NA	A3	G2	Stage I	KIDNEY
1	4758	K475801A	K475801A.htseq.txt	tumor	1	Yes	0	1	01:23:00	SFPQ_TFE3	Yes	TRUE	TCGA-BP-4758	40	null	-14823	NA	2375	0	2208	2208	M0	NA	NA	MALE	Low	Kidney Clear Cell Renal Carcinoma	NA	8310/3	C64.9	YES	NA	NA	Right	NX	NO	NA	NA	NA	TUMOR FREE	Normal	NO	T1a	NO	Low	BP	G2	Stage I	KIDNEY
2	3316	K331601A	K331601A.htseq.txt	tumor	0	No	0	0				FALSE	TCGA-A3-3316	57	null	-20940	NA	1744	0	1493	1493	M0	NA	NA	MALE	NA	Kidney Clear Cell Renal Carcinoma	NA	8310/3	C64.9	YES	NA	NA	Left	NX	NA	NA	NA	NA	TUMOR FREE	NA	NO	T2	NO	NA	A3	G3	Stage II	KIDNEY
3	3317	K331701A	K331701A.htseq.txt	tumor	1	Yes	1	0	21	ABCG1_SLC37A1	No	FALSE	TCGA-A3-3317	67	null	-24806	NA	1737	0	1491	1491	M0	NA	NA	MALE	NA	Kidney Clear Cell Renal Carcinoma	NA	8310/3	C64.9	YES	NA	NA	Left	N0	NA	NA	NA	NA	TUMOR FREE	NA	NO	T2	NO	NA	A3	G2	Stage II	KIDNEY
2	3319	K331901A	K331901A.htseq.txt	tumor	0	No	0	0				FALSE	TCGA-A3-3319	70	null	-25690	NA	1542	0	1130	1130	M0	NA	NA	MALE	NA	Kidney Clear Cell Renal Carcinoma	NA	8310/3	C64.9	YES	NA	NA	Left	NX	NA	NA	NA	NA	TUMOR FREE	NA	NO	T1b	NO	NA	A3	G2	Stage I	KIDNEY
1	3320	K332001A	K332001A.htseq.txt	tumor	0	No	0	0				FALSE	TCGA-A3-3320	52	null	-19146	NA	1620	0	1508	1508	M0	NA	NA	FEMALE	NA	Kidney Clear Cell Renal Carcinoma	NA	8310/3	C64.9	YES	NA	NA	Right	NX	NA	NA	NA	NA	TUMOR FREE	NA	NO	T1b	NO	NA	A3	G1	Stage I	KIDNEY
1	3322	K332201A	K332201A.htseq.txt	tumor	0	No	0	0				FALSE	TCGA-A3-3322	51	null	-18748	NA	1486	0	1477	1477	M0	NA	NA	MALE	NA	Kidney Clear Cell Renal Carcinoma	NA	8310/3	C64.9	YES	NA	NA	Left	NX	NA	NA	NA	NA	TUMOR FREE	NA	NO	T1a	NO	NA	A3	G2	Stage I	KIDNEY
3	3323	K332301A	K332301A.htseq.txt	tumor	0	No	0	0				FALSE	TCGA-A3-3323	53	null	-19448	NA	1488	0	1105	1105	M0	NA	NA	MALE	NA	Kidney Clear Cell Renal Carcinoma	NA	8310/3	C64.9	YES	NA	NA	Right	NX	NA	NA	NA	NA	TUMOR FREE	NA	NO	T1b	NO	NA	A3	G1	Stage I	KIDNEY
1	3324	K332401A	K332401A.htseq.txt	tumor	0	No	0	0				FALSE	TCGA-A3-3324	51	null	-18839	NA	1341	0	1186	1186	M0	NA	NA	MALE	NA	Kidney Clear Cell Renal Carcinoma	NA	8310/3	C64.9	YES	NA	NA	Right	NX	NA	NA	NA	NA	TUMOR FREE	NA	NO	T1b	NO	NA	A3	G3	Stage I	KIDNEY
1	3325	K332501A	K332501A.htseq.txt	tumor	0	No	0	0				FALSE	TCGA-A3-3325	52	null	-19114	NA	1650	0	751	751	M0	NA	NA	MALE	NA	Kidney Clear Cell Renal Carcinoma	NA	8310/3	C64.9	YES	NA	NA	NA	NX	NO	NA	NA	NA	TUMOR FREE	NA	NO	T1a	YES	NA	A3	G2	Stage I	KIDNEY
3	3328	K332801A	K332801A.htseq.txt	tumor	1	Yes	0	1	19:09:00	PPP2R1A_CENPP	No	FALSE	TCGA-A3-3328	79	null	-29159	NA	1348	0	785	785	M0	NA	NA	MALE	NA	Kidney Clear Cell Renal Carcinoma	NA	8310/3	C64.9	YES	NA	NA	Left	N0	YES	NA	NA	NA	TUMOR FREE	NA	NO	T1b	YES	NA	A3	G2	Stage I	KIDNEY
1	3329	K332901A	K332901A.htseq.txt	tumor	0	No	0	0				FALSE	TCGA-A3-3329	75	null	-27636	NA	1343	0	706	706	M0	NA	NA	MALE	NA	Kidney Clear Cell Renal Carcinoma	NA	8310/3	C64.9	YES	NA	NA	Right	N0	NO	NA	NA	NA	TUMOR FREE	NA	NO	T1b	YES	NA	A3	G2	Stage I	KIDNEY
1	3331	K333101A	K333101A.htseq.txt	tumor	0	No	0	0				FALSE	TCGA-A3-3331	86	null	-31593	NA	1779	0	1506	1506	M0	NA	NA	FEMALE	NA	Kidney Clear Cell Renal Carcinoma	NA	8310/3	C64.9	YES	NA	NA	Right	N0	NA	NA	NA	NA	TUMOR FREE	NA	NO	T1	NO	NA	A3	G2	Stage I	KIDNEY
3	3335	K333501A	K333501A.htseq.txt	tumor	0	No	0	0				FALSE	TCGA-A3-3335	41	null	-15250	NA	1356	0	664	664	M0	NA	NA	MALE	NA	Kidney Clear Cell Renal Carcinoma	NA	8310/3	C64.9	YES	NA	NA	Right	N0	NO	NA	NA	NA	TUMOR FREE	NA	NO	T2a	NO	NA	A3	G4	Stage II	KIDNEY
1	3343	K334301A	K334301A.htseq.txt	tumor	1	Yes	1	0	3	DCP1A_SNRK	No	FALSE	TCGA-A3-3343	79	null	-28917	NA	2205	0	944	944	M0	NA	NA	MALE	NA	Kidney Clear Cell Renal Carcinoma	NA	8310/3	C64.9	YES	NA	NA	Left	N0	YES	NA	0	NA	TUMOR FREE	NA	NO	T2	YES	NA	A3	G3	Stage II	KIDNEY
2	3347	K334701A	K334701A.htseq.txt	tumor	0	No	0	0				FALSE	TCGA-A3-3347	76	null	-27965	NA	1833	0	1097	1097	M0	NA	NA	FEMALE	NA	Kidney Clear Cell Renal Carcinoma	NA	8310/3	C64.9	YES	NA	NA	Right	N1	YES	NA	1	NA	NA	NA	NO	T1b	NO	NA	A3	G2	Stage III	KIDNEY
1	3349	K334901A	K334901A.htseq.txt	tumor	0	No	0	0				FALSE	TCGA-A3-3349	34	null	-12419	NA	1583	0	1385	1385	M0	NA	NA	FEMALE	NA	Kidney Clear Cell Renal Carcinoma	NA	8310/3	C64.9	YES	NA	NA	Left	N0	NO	NA	NA	NA	TUMOR FREE	NA	NO	T1b	NO	NA	A3	G2	Stage I	KIDNEY
1	3351	K335101A	K335101A.htseq.txt	tumor	0	No	0	0				FALSE	TCGA-A3-3351	42	null	-15562	NA	1199	0	910	910	M0	NA	NA	MALE	NA	Kidney Clear Cell Renal Carcinoma	NA	8310/3	C64.9	YES	NA	NA	Right	N0	NO	NA	NA	NA	TUMOR FREE	NA	NO	T2a	NO	NA	A3	G2	Stage II	KIDNEY
1	3352	K335201A	K335201A.htseq.txt	tumor	0	No	0	0				FALSE	TCGA-A3-3352	74	null	[Completed]	561	1930	0	561	561	M0	NA	NA	MALE	NA	Kidney Clear Cell Renal Carcinoma	NA	8310/3	C64.9	YES	NA	NA	Left	N0	NO	NA	NA	NA	NA	NA	NO	T3a	NO	NA	A3	G3	Stage III	KIDNEY
3	3357	K335701A	K335701A.htseq.txt	tumor	0	No	0	0				FALSE	TCGA-A3-3357	62	null	-22827	NA	2089	0	1425	1425	M0	NA	NA	MALE	NA	Kidney Clear Cell Renal Carcinoma	NA	8310/3	C64.9	YES	NA	NA	Right	N0	NO	NA	NA	NA	TUMOR FREE	NA	NO	T2	NO	NA	A3	G3	Stage II	KIDNEY
1	3358	K335801A	K335801A.htseq.txt	tumor	0	No	0	0				FALSE	TCGA-A3-3358	57	null	-21093	NA	2016	0	1307	1307	M0	NA	NA	FEMALE	NA	Kidney Clear Cell Renal Carcinoma	NA	8310/3	C64.9	YES	NA	NA	Left	N0	NO	NA	NA	NA	TUMOR FREE	NA	NO	T1a	YES	NA	A3	G2	Stage I	KIDNEY
1	3359	K335901A	K335901A.htseq.txt	tumor	0	No	0	0				FALSE	TCGA-A3-3359	82	null	-30254	NA	1950	0	1286	1286	M0	NA	NA	FEMALE	NA	Kidney Clear Cell Renal Carcinoma	NA	8310/3	C64.9	YES	NA	NA	Left	N0	NO	NA	NA	NA	TUMOR FREE	NA	NO	T1a	YES	NA	A3	G2	Stage I	KIDNEY
3	3362	K336201A	K336201A.htseq.txt	tumor	0	No	0	0				FALSE	TCGA-A3-3362	60	null	-21988	NA	1692	0	1559	1559	M0	NA	NA	FEMALE	NA	Kidney Clear Cell Renal Carcinoma	NA	8310/3	C64.9	YES	NA	NA	Left	N0	NO	NA	NA	NA	TUMOR FREE	NA	NO	T1a	NO	NA	A3	G2	Stage I	KIDNEY
3	3363	K336301A	K336301A.htseq.txt	tumor	0	No	0	0				FALSE	TCGA-A3-3363	50	null	-18598	NA	1489	0	319	319	M0	NA	NA	MALE	NA	Kidney Clear Cell Renal Carcinoma	NA	8310/3	C64.9	YES	NA	NA	Left	N0	NA	NA	NA	NA	TUMOR FREE	NA	NO	T2	NO	NA	A3	G2	Stage II	KIDNEY
1	3365	K336501A	K336501A.htseq.txt	tumor	0	No	0	0				FALSE	TCGA-A3-3365	46	null	-16924	NA	1281	0	872	872	M0	NA	NA	MALE	NA	Kidney Clear Cell Renal Carcinoma	NA	8310/3	C64.9	YES	NA	NA	Right	NX	NA	NA	NA	NA	NA	NA	NO	T1a	NO	NA	A3	G2	Stage I	KIDNEY
1	3367	K336701A	K336701A.htseq.txt	tumor	0	No	0	0				FALSE	TCGA-A3-3367	72	null	-26478	NA	1712	0	1054	1054	M0	NA	NA	MALE	NA	Kidney Clear Cell Renal Carcinoma	NA	8310/3	C64.9	YES	NA	NA	Left	N0	NO	NA	NA	NA	TUMOR FREE	NA	NO	T1b	NO	NA	A3	G3	Stage I	KIDNEY
1	3370	K337001A	K337001A.htseq.txt	tumor	0	No	0	0				FALSE	TCGA-A3-3370	48	null	-17623	NA	1510	0	776	776	M0	NA	NA	FEMALE	NA	Kidney Clear Cell Renal Carcinoma	NA	8310/3	C64.9	YES	NA	NA	Left	N0	NO	NA	NA	NA	TUMOR FREE	NA	NO	T1b	NO	NA	A3	G2	Stage I	KIDNEY
3	3372	K337201A	K337201A.htseq.txt	tumor	0	No	0	0				FALSE	TCGA-A3-3372	64	null	-23527	NA	1121	0	735	735	M0	NA	NA	MALE	NA	Kidney Clear Cell Renal Carcinoma	NA	8310/3	C64.9	YES	NA	NA	Left	NX	NA	NA	NA	NA	TUMOR FREE	NA	NO	T3	NO	NA	A3	G2	Stage III	KIDNEY
1	3373	K337301A	K337301A.htseq.txt	tumor	1	Yes	0	1	01:04:00	HES4_AFF1	Yes	FALSE	TCGA-A3-3373	54	null	-19965	NA	1236	0	334	334	M0	NA	NA	FEMALE	NA	Kidney Clear Cell Renal Carcinoma	NA	8310/3	C64.9	YES	NA	NA	Right	N0	NO	NA	NA	NA	TUMOR FREE	NA	NO	T1b	NO	NA	A3	G3	Stage I	KIDNEY
3	3374	K337401A	K337401A.htseq.txt	tumor	0	No	0	0				FALSE	TCGA-A3-3374	51	null	-18901	NA	1629	0	1313	1313	M0	NA	NA	FEMALE	NA	Kidney Clear Cell Renal Carcinoma	NA	8310/3	C64.9	YES	NA	NA	Right	N0	NA	NA	NA	NA	NA	NA	NO	T1b	NO	NA	A3	G2	Stage I	KIDNEY
2	3378	K337801A	K337801A.htseq.txt	tumor	0	No	0	0				FALSE	TCGA-A3-3378	60	null	-22096	NA	1511	0	630	630	M0	NA	NA	MALE	NA	Kidney Clear Cell Renal Carcinoma	NA	8310/3	C64.9	YES	NA	NA	Left	N0	NA	NA	NA	NA	TUMOR FREE	NA	NO	T1	NO	NA	A3	G3	Stage I	KIDNEY
1	3380	K338001A	K338001A.htseq.txt	tumor	0	No	0	0				FALSE	TCGA-A3-3380	54	null	-19814	NA	1048	0	567	567	M0	NA	NA	MALE	NA	Kidney Clear Cell Renal Carcinoma	NA	8310/3	C64.9	YES	NA	NA	Left	N0	NA	NA	NA	NA	TUMOR FREE	NA	NO	T1	NO	NA	A3	G2	Stage I	KIDNEY
2	3382	K338201A	K338201A.htseq.txt	tumor	0	No	0	0				FALSE	TCGA-A3-3382	69	null	-25202	NA	952	0	574	574	M0	NA	NA	MALE	NA	Kidney Clear Cell Renal Carcinoma	NA	8310/3	C64.9	YES	NA	NA	Left	NX	NA	NA	NA	NA	WITH TUMOR	NA	NO	T1b	NO	NA	A3	G3	Stage I	KIDNEY
1	3385	K338501A	K338501A.htseq.txt	tumor	0	No	0	0				FALSE	TCGA-A3-3385	46	null	-17107	NA	1439	0	726	726	M0	NA	NA	FEMALE	NA	Kidney Clear Cell Renal Carcinoma	NA	8310/3	C64.9	YES	NA	NA	Left	N0	NO	NA	NA	NA	TUMOR FREE	NA	NO	T1a	NO	NA	A3	G2	Stage I	KIDNEY
2	3387	K338701A	K338701A.htseq.txt	tumor	0	No	0	0				FALSE	TCGA-A3-3387	49	null	-17928	NA	1590	0	616	616	M0	NA	NA	MALE	NA	Kidney Clear Cell Renal Carcinoma	NA	8310/3	C64.9	YES	NA	NA	Left	N0	NO	NA	NA	NA	TUMOR FREE	NA	NO	T1a	NO	NA	A3	G2	Stage I	KIDNEY
2	3426	K342601A	K342601A.htseq.txt	tumor	0	No	0	0				FALSE	TCGA-AK-3426	37	null	-13770	884	2497	0	884	612	M0	NA	NA	MALE	Low	Kidney Clear Cell Renal Carcinoma	NA	8310/3	C64.9	YES	0	NA	Right	N1	YES	NA	3	NA	WITH TUMOR	Normal	NO	T3a	NO	NA	AK	G3	Stage III	KIDNEY
3	3427	K342701A	K342701A.htseq.txt	tumor	0	No	0	0				FALSE	TCGA-AK-3427	65	null	-24067	NA	2589	0	2566	2566	M0	NA	NA	MALE	Normal	Kidney Clear Cell Renal Carcinoma	NA	8310/3	C64.9	YES	NA	NA	Left	N0	YES	NA	15	NA	TUMOR FREE	Normal	NO	T1a	NO	NA	AK	GX	Stage I	KIDNEY
1	3429	K342901A	K342901A.htseq.txt	tumor	0	No	0	0				FALSE	TCGA-AK-3429	54	null	-19848	NA	2327	0	2017	2017	M0	NA	NA	FEMALE	Normal	Kidney Clear Cell Renal Carcinoma	NA	8310/3	C64.9	YES	NA	NA	Right	N0	YES	NA	0	NA	TUMOR FREE	Normal	NO	T2	NO	Normal	AK	G2	Stage II	KIDNEY
2	3431	K343101A	K343101A.htseq.txt	tumor	0	No	0	0				FALSE	TCGA-AK-3431	62	null	-22852	NA	2204	0	1853	1853	M0	NA	NA	FEMALE	NA	Kidney Clear Cell Renal Carcinoma	NA	8310/3	C64.9	YES	NA	NA	Right	NX	NO	0	NA	NA	TUMOR FREE	NA	NO	T2	NO	NA	AK	G3	Stage III	KIDNEY
3	3433	K343301A	K343301A.htseq.txt	tumor	0	No	0	0				FALSE	TCGA-AK-3433	48	null	-17853	NA	2195	0	2192	2192	M0	NA	NA	FEMALE	Normal	Kidney Clear Cell Renal Carcinoma	NA	8310/3	C64.9	YES	NA	NA	Right	N0	YES	NA	NA	NA	TUMOR FREE	Normal	NO	T2	NO	Normal	AK	GX	Stage II	KIDNEY
1	3434	K343401A	K343401A.htseq.txt	tumor	0	No	0	0				FALSE	TCGA-AK-3434	72	null	-26490	NA	2188	0	2086	2086	M0	NA	NA	MALE	Normal	Kidney Clear Cell Renal Carcinoma	NA	8310/3	C64.9	YES	NA	Normal	Right	NX	NO	0	NA	NA	WITH TUMOR	Low	NO	T1b	NO	Normal	AK	G2	Stage I	KIDNEY
3	3436	K343601A	K343601A.htseq.txt	tumor	0	No	0	0				FALSE	TCGA-AK-3436	40	null	-14842	NA	2075	0	2043	2043	M1	NA	NA	MALE	Normal	Kidney Clear Cell Renal Carcinoma	NA	8310/3	C64.9	YES	NA	NA	Left	N0	YES	NA	0	NA	TUMOR FREE	Normal	NO	T2	NO	NA	AK	G2	Stage IV	KIDNEY
3	3440	K344001A	K344001A.htseq.txt	tumor	0	No	0	0				FALSE	TCGA-AK-3440	58	null	-21337	NA	1809	0	1744	1744	M0	NA	NA	MALE	Low	Kidney Clear Cell Renal Carcinoma	NA	8310/3	C64.9	YES	NA	NA	Left	NX	NO	0	NA	NA	TUMOR FREE	Elevated	NO	T1a	NO	Normal	AK	G3	Stage I	KIDNEY
3	3443	K344301A	K344301A.htseq.txt	tumor	0	No	0	0				FALSE	TCGA-AK-3443	45	null	-16578	NA	1568	0	1423	1423	M0	NA	NA	MALE	NA	Kidney Clear Cell Renal Carcinoma	NA	8310/3	C64.9	YES	NA	NA	Right	N0	YES	NA	0	NA	TUMOR FREE	NA	NO	T2	NO	Normal	AK	GX	Stage II	KIDNEY
2	3445	K344501A	K344501A.htseq.txt	tumor	0	No	0	0				FALSE	TCGA-AK-3445	69	null	-25494	NA	1697	0	1279	1279	M0	NA	NA	MALE	NA	Kidney Clear Cell Renal Carcinoma	NA	8310/3	C64.9	YES	NA	NA	Left	NX	NO	0	NA	NA	TUMOR FREE	NA	NO	T3a	NO	NA	AK	G3	Stage I	KIDNEY
1	3450	K345001A	K345001A.htseq.txt	tumor	0	No	0	0				FALSE	TCGA-AK-3450	85	null	-31364	NA	1591	0	1499	1499	M0	NA	NA	FEMALE	Normal	Kidney Clear Cell Renal Carcinoma	NA	8310/3	C64.9	YES	NA	NA	Right	NX	NO	NA	NA	NA	TUMOR FREE	Normal	NO	T1a	YES	NA	AK	G2	Stage I	KIDNEY
3	3451	K345101A	K345101A.htseq.txt	tumor	0	No	0	0				FALSE	TCGA-AK-3451	48	null	-17859	NA	1569	0	1481	1481	M0	NA	NA	MALE	Normal	Kidney Clear Cell Renal Carcinoma	NA	8310/3	C64.9	YES	NA	NA	Left	N0	YES	NA	0	NA	TUMOR FREE	Normal	NO	T2	NO	Normal	AK	G3	Stage II	KIDNEY
3	3453	K345301A	K345301A.htseq.txt	tumor	0	No	0	0				FALSE	TCGA-AK-3453	58	null	-21271	NA	1460	0	1190	1190	M0	NA	NA	FEMALE	NA	Kidney Clear Cell Renal Carcinoma	NA	8310/3	C64.9	YES	NA	NA	Right	NX	NO	0	NA	NA	NA	NA	NO	T2	NO	NA	AK	G2	Stage II	KIDNEY
1	3454	K345401A	K345401A.htseq.txt	tumor	0	No	0	0				FALSE	TCGA-AK-3454	84	null	-30862	NA	1550	0	873	873	M0	NA	NA	MALE	Low	Kidney Clear Cell Renal Carcinoma	NA	8310/3	C64.9	YES	NA	NA	Right	NX	NO	0	NA	NA	TUMOR FREE	Normal	NO	T1b	YES	NA	AK	G3	Stage I	KIDNEY
3	3455	K345501A	K345501A.htseq.txt	tumor	0	No	0	0				FALSE	TCGA-AK-3455	71	null	-26221	683	1518	0	683	29	M0	NA	NA	FEMALE	Low	Kidney Clear Cell Renal Carcinoma	NA	8310/3	C64.9	YES	NA	NA	Right	NX	NO	NA	NA	NA	NA	Elevated	NO	T3b	YES	NA	AK	G3	Stage III	KIDNEY
1	5705	K570501A	K570501A.htseq.txt	tumor	1	Yes	0	1	01:23:00	SFPQ_TFE3	Yes	TRUE	TCGA-B0-5705	65	null	-23745	NA	3290	0	3335	3335	M0	NA	NA	FEMALE	Low	Kidney Clear Cell Renal Carcinoma	NA	8310/3	C64.9	YES	NA	NA	Left	N0	YES	NA	NA	NA	TUMOR FREE	Normal	NO	T1	NO	Low	B0	G2	Stage I	KIDNEY
1	3458	K345801A	K345801A.htseq.txt	tumor	0	No	0	0				FALSE	TCGA-AK-3458	48	null	-17557	NA	1351	0	1168	1168	M0	NA	NA	MALE	Normal	Kidney Clear Cell Renal Carcinoma	NA	8310/3	C64.9	YES	NA	NA	Right	NX	NO	NA	NA	NA	TUMOR FREE	Normal	NO	T1b	NO	Normal	AK	G3	Stage I	KIDNEY
1	3460	K346001A	K346001A.htseq.txt	tumor	0	No	0	0				FALSE	TCGA-AK-3460	58	null	-21281	NA	1199	0	951	951	M0	NA	NA	MALE	NA	Kidney Clear Cell Renal Carcinoma	NA	8310/3	C64.9	YES	NA	NA	Right	NX	NO	0	NA	NA	TUMOR FREE	NA	NO	T1a	NO	NA	AK	G2	Stage I	KIDNEY
1	3461	K346101A	K346101A.htseq.txt	tumor	0	No	0	0				FALSE	TCGA-AK-3461	72	null	-26463	NA	1157	0	853	853	M0	NA	NA	MALE	Normal	Kidney Clear Cell Renal Carcinoma	NA	8310/3	C64.9	YES	NA	NA	Left	NX	NO	0	NA	NA	TUMOR FREE	Normal	NO	T1a	NO	Normal	AK	G2	Stage I	KIDNEY
3	3777	K377701A	K377701A.htseq.txt	tumor	4	Yes	2	2	1,10:3,12,22:8	ADAM15_DCST1,ITGB1_FLNB,CPM_GOLT1B,MKL1_KIAA0146	yes	FALSE	TCGA-AS-3777	63	null	-23039	NA	411	0	40	40	M0	NA	NA	MALE	Normal	Kidney Clear Cell Renal Carcinoma	NA	8310/3	C64.9	YES	NA	NA	Left	NX	NO	NA	NA	NA	TUMOR FREE	Normal	NO	T1a	NO	Normal	AS	NA	Stage I	KIDNEY
3	3923	K392301A	K392301A.htseq.txt	tumor	0	No	0	0				FALSE	TCGA-B2-3923	59	null	-21793	NA	256	0	178	178	M0	NA	NA	MALE	Normal	Kidney Clear Cell Renal Carcinoma	NA	8310/3	C64.9	YES	NA	Elevated	Right	NX	NO	NA	NA	NA	TUMOR FREE	Normal	NO	T2	NO	Normal	B2	G2	Stage II	KIDNEY
1	3924	K392401A	K392401A.htseq.txt	tumor	0	No	0	0				FALSE	TCGA-B2-3924	73	null	-26846	NA	265	0	194	194	M0	NA	NA	MALE	Low	Kidney Clear Cell Renal Carcinoma	NA	8310/3	C64.9	YES	NA	NA	Left	NX	NO	NA	NA	NA	TUMOR FREE	Normal	NO	T1b	NO	NA	B2	G2	Stage I	KIDNEY
3	4098	K409801A	K409801A.htseq.txt	tumor	0	No	0	0				FALSE	TCGA-B2-4098	72	null	-26606	50	244	0	50	50	M0	NA	NA	FEMALE	Low	Kidney Clear Cell Renal Carcinoma	NA	8310/3	C64.9	YES	NA	NA	Left	NX	NO	NA	NA	NA	TUMOR FREE	Normal	NO	T1b	NO	Normal	B2	G2	Stage I	KIDNEY
1	4099	K409901A	K409901A.htseq.txt	tumor	0	No	0	0				FALSE	TCGA-B2-4099	83	null	-30355	NA	230	0	110	110	M0	NA	NA	MALE	Normal	Kidney Clear Cell Renal Carcinoma	NA	8310/3	C64.9	YES	NA	NA	Right	NX	NO	NA	NA	NA	TUMOR FREE	Normal	NO	T1a	NO	NA	B2	G2	Stage I	KIDNEY
1	4101	K410101A	K410101A.htseq.txt	tumor	1	Yes	0	1	03:05:00	FAM172A_FHIT	yes	FALSE	TCGA-B2-4101	52	null	-19058	NA	205	0	90	90	M0	NA	NA	MALE	Normal	Kidney Clear Cell Renal Carcinoma	NA	8310/3	C64.9	YES	NA	NA	Left	NX	NO	NA	NA	NA	TUMOR FREE	Normal	NO	T2a	NO	Normal	B2	G3	Stage II	KIDNEY
1	4102	K410201A	K410201A.htseq.txt	tumor	2	Yes	1	1	00:03:05.120000	FHIT_CAMK4,ZCCHC8_RSRC2	yes	FALSE	TCGA-B2-4102	61	null	-22492	NA	202	0	15	15	M0	NA	NA	MALE	Normal	Kidney Clear Cell Renal Carcinoma	NA	8310/3	C64.9	YES	NA	NA	Right	NX	NO	NA	NA	NA	TUMOR FREE	Normal	NO	T1b	NO	Elevated	B2	G2	Stage I	KIDNEY
2	4143	K414301A	K414301A.htseq.txt	tumor	0	No	0	0				FALSE	TCGA-B8-4143	66	null	-24132	709	3153	0	709	637	M1	NA	NA	FEMALE	Low	Kidney Clear Cell Renal Carcinoma	NA	8310/3	C64.9	YES	NA	NA	Left	N0	YES	NA	0	NA	WITH TUMOR	Normal	NO	T3	NO	Elevated	B8	G3	Stage IV	KIDNEY
1	4146	K414601B	K414601B.htseq.txt	tumor	0	No	0	0				FALSE	TCGA-B8-4146	41	null	-15063	NA	630	0	511	511	M0	NA	NA	FEMALE	NA	Kidney Clear Cell Renal Carcinoma	NA	8310/3	C64.9	YES	NA	NA	Right	NX	NO	NA	NA	NA	TUMOR FREE	NA	NO	T1b	NO	NA	B8	G2	Stage I	KIDNEY
1	4148	K414801A	K414801A.htseq.txt	tumor	0	No	0	0				FALSE	TCGA-B8-4148	63	null	-23062	NA	394	0	379	379	M0	NA	NA	FEMALE	Normal	Kidney Clear Cell Renal Carcinoma	NA	8310/3	C64.9	YES	NA	Normal	Left	N0	NO	0	0	NA	TUMOR FREE	Normal	NO	T1a	NO	Normal	B8	G3	Stage I	KIDNEY
1	4151	K415101A	K415101A.htseq.txt	tumor	0	No	0	0				FALSE	TCGA-B8-4151	51	null	-18760	NA	346	0	279	279	M0	NA	NA	FEMALE	Normal	Kidney Clear Cell Renal Carcinoma	NA	8310/3	C64.9	YES	NA	Normal	Right	N0	NO	NA	NA	NA	TUMOR FREE	Normal	NO	T3	NO	Normal	B8	G2	Stage III	KIDNEY
1	4153	K415301B	K415301B.htseq.txt	tumor	0	No	0	0				FALSE	TCGA-B8-4153	74	null	-27031	NA	455	0	404	404	M0	NA	NA	MALE	Low	Kidney Clear Cell Renal Carcinoma	NA	8310/3	C64.9	YES	NA	Normal	Left	NX	NO	NA	NA	NA	WITH TUMOR	Normal	NO	T3a	NO	NA	B8	G3	Stage III	KIDNEY
1	4154	K415401A	K415401A.htseq.txt	tumor	0	No	0	0				FALSE	TCGA-B8-4154	73	null	-26882	NA	255	0	255	255	M0	NA	NA	FEMALE	Normal	Kidney Clear Cell Renal Carcinoma	NA	8310/3	C64.9	YES	NA	Normal	Left	N0	NO	NA	NA	NA	TUMOR FREE	Normal	NO	T1a	NO	Normal	B8	G2	Stage I	KIDNEY
1	4158	K415801A	K415801A.htseq.txt	tumor	0	No	0	0				FALSE	TCGA-BP-4158	69	null	-25210	NA	3325	0	3377	3377	M0	NA	NA	MALE	Low	Kidney Clear Cell Renal Carcinoma	NA	8310/3	C64.9	YES	NA	NA	Right	N0	YES	NA	0	NA	TUMOR FREE	Low	NO	T1b	YES	Normal	BP	G2	Stage I	KIDNEY
1	4159	K415901A	K415901A.htseq.txt	tumor	0	No	0	0				FALSE	TCGA-BP-4159	70	null	-25685	2592	3203	0	2592	2349	M0	NA	NA	MALE	Normal	Kidney Clear Cell Renal Carcinoma	NA	8310/3	C64.9	YES	NA	NA	Right	N0	YES	NA	0	NA	WITH TUMOR	Normal	NO	T1b	NO	Low	BP	G2	Stage I	KIDNEY
3	4160	K416001A	K416001A.htseq.txt	tumor	0	No	0	0				FALSE	TCGA-BP-4160	67	null	-24720	NA	3144	0	2881	2881	M0	NA	NA	MALE	Low	Kidney Clear Cell Renal Carcinoma	NA	8310/3	C64.9	YES	NA	NA	Left	N0	YES	NA	0	NA	TUMOR FREE	Normal	NO	T3a	YES	Normal	BP	G2	Stage III	KIDNEY
1	4161	K416101A	K416101A.htseq.txt	tumor	0	No	0	0				FALSE	TCGA-BP-4161	74	null	-27118	NA	3101	0	2746	2746	M0	NA	NA	MALE	Low	Kidney Clear Cell Renal Carcinoma	NA	8310/3	C64.9	YES	NA	NA	Right	NX	NO	NA	NA	NA	WITH TUMOR	Normal	NO	T1b	NO	Low	BP	G3	Stage I	KIDNEY
1	4162	K416201A	K416201A.htseq.txt	tumor	0	No	0	0				FALSE	TCGA-BP-4162	65	null	-23965	NA	3086	0	3074	3074	M0	NA	NA	FEMALE	Low	Kidney Clear Cell Renal Carcinoma	NA	8310/3	C64.9	YES	NA	NA	Right	N0	YES	NA	0	NA	TUMOR FREE	Normal	NO	T1b	NO	Low	BP	G2	Stage I	KIDNEY
3	4163	K416301A	K416301A.htseq.txt	tumor	0	No	0	0				FALSE	TCGA-BP-4163	60	null	-21989	NA	3036	0	2830	2830	M0	NA	NA	FEMALE	Low	Kidney Clear Cell Renal Carcinoma	NA	8310/3	C64.9	YES	NA	NA	Right	N0	YES	NA	0	NA	TUMOR FREE	Elevated	NO	T3a	NO	Normal	BP	G3	Stage III	KIDNEY
1	4164	K416401A	K416401A.htseq.txt	tumor	0	No	0	0				FALSE	TCGA-BP-4164	51	null	-18897	992	3000	0	992	386	M0	NA	NA	FEMALE	Low	Kidney Clear Cell Renal Carcinoma	NA	8310/3	C64.9	YES	NA	Normal	Left	NX	NO	NA	NA	NA	TUMOR FREE	Elevated	NO	T3a	NO	Elevated	BP	G2	Stage III	KIDNEY
1	4165	K416501A	K416501A.htseq.txt	tumor	0	No	0	0				FALSE	TCGA-BP-4165	64	null	-23685	NA	2943	0	2946	2946	M0	NA	NA	FEMALE	Low	Kidney Clear Cell Renal Carcinoma	NA	8310/3	C64.9	YES	NA	NA	Right	N0	YES	NA	0	NA	WITH TUMOR	Normal	NO	T1b	NO	Low	BP	G1	Stage I	KIDNEY
3	4166	K416601A	K416601A.htseq.txt	tumor	0	No	0	0				FALSE	TCGA-BP-4166	69	null	-25300	NA	2852	0	13	13	M0	NA	NA	MALE	Low	Kidney Clear Cell Renal Carcinoma	NA	8310/3	C64.9	YES	NA	NA	Left	N0	YES	NA	0	NA	TUMOR FREE	Normal	NO	T3a	NO	Low	BP	G3	Stage III	KIDNEY
2	4167	K416701A	K416701A.htseq.txt	tumor	0	No	0	0				FALSE	TCGA-BP-4167	59	null	-21901	NA	2764	0	2718	2718	M0	NA	NA	MALE	Low	Kidney Clear Cell Renal Carcinoma	NA	8310/3	C64.9	YES	NA	NA	Right	NX	NO	NA	NA	NA	TUMOR FREE	Normal	NO	T3a	NO	Low	BP	G2	Stage III	KIDNEY
2	4169	K416901A	K416901A.htseq.txt	tumor	1	Yes	0	1	12:23:00	OS9_TAF7L	No	FALSE	TCGA-BP-4169	76	null	-27778	701	2743	0	701	496	M0	NA	NA	FEMALE	Low	Kidney Clear Cell Renal Carcinoma	NA	8310/3	C64.9	YES	NA	NA	Right	N0	YES	NA	0	NA	WITH TUMOR	Normal	NO	T2	NO	Low	BP	G2	Stage II	KIDNEY
1	4170	K417001A	K417001A.htseq.txt	tumor	0	No	0	0				FALSE	TCGA-BP-4170	72	null	-26596	2343	2737	0	2343	695	M0	NA	NA	FEMALE	Low	Kidney Clear Cell Renal Carcinoma	NA	8310/3	C64.9	YES	NA	NA	Left	N0	YES	NA	0	NA	TUMOR FREE	Normal	NO	T1b	NO	Low	BP	G2	Stage I	KIDNEY
3	4173	K417301A	K417301A.htseq.txt	tumor	0	No	0	0				FALSE	TCGA-BP-4173	47	null	-17449	NA	2219	0	1893	1893	M0	NA	NA	MALE	Low	Kidney Clear Cell Renal Carcinoma	NA	8310/3	C64.9	YES	NA	NA	Right	N0	YES	NA	0	NA	TUMOR FREE	Normal	NO	T2	NO	Normal	BP	G3	Stage II	KIDNEY
3	4174	K417401A	K417401A.htseq.txt	tumor	0	No	0	0				FALSE	TCGA-BP-4174	49	null	-18054	NA	2212	0	1879	1879	M0	NA	NA	MALE	Low	Kidney Clear Cell Renal Carcinoma	NA	8310/3	C64.9	YES	NA	NA	Right	N0	YES	NA	0	NA	TUMOR FREE	Normal	NO	T2	NO	Low	BP	G3	Stage II	KIDNEY
2	4176	K417601A	K417601A.htseq.txt	tumor	0	No	0	0				FALSE	TCGA-BP-4176	64	null	-23609	NA	2064	0	1955	1955	M0	NA	NA	MALE	Normal	Kidney Clear Cell Renal Carcinoma	NA	8310/3	C64.9	YES	NA	NA	Right	NX	NO	NA	NA	NA	TUMOR FREE	Normal	NO	T1b	NO	Low	BP	G2	Stage I	KIDNEY
3	4177	K417701A	K417701A.htseq.txt	tumor	0	No	0	0				FALSE	TCGA-BP-4177	65	null	-23954	NA	2058	0	1670	1670	M0	NA	NA	MALE	Normal	Kidney Clear Cell Renal Carcinoma	NA	8310/3	C64.9	YES	NA	NA	Right	NX	NO	NA	NA	NA	TUMOR FREE	Low	NO	T1a	NO	Low	BP	G2	Stage I	KIDNEY
1	4325	K432501A	K432501A.htseq.txt	tumor	0	No	0	0				FALSE	TCGA-BP-4325	64	null	-23588	NA	3280	0	2964	2964	M0	NA	NA	FEMALE	Normal	Kidney Clear Cell Renal Carcinoma	NA	8310/3	C64.9	YES	NA	NA	Left	N0	NO	NA	NA	NA	TUMOR FREE	Normal	NO	T1b	NO	Low	BP	G2	Stage I	KIDNEY
2	4326	K432601A	K432601A.htseq.txt	tumor	0	No	0	0				FALSE	TCGA-BP-4326	53	null	-19376	NA	3263	0	1624	1108	M0	NA	NA	FEMALE	Low	Kidney Clear Cell Renal Carcinoma	NA	8310/3	C64.9	YES	NA	NA	Left	N0	YES	NA	0	NA	TUMOR FREE	Elevated	NO	T1b	NO	Low	BP	G2	Stage I	KIDNEY
3	4327	K432701A	K432701A.htseq.txt	tumor	0	No	0	0				FALSE	TCGA-BP-4327	75	null	-27556	108	3156	0	108	64	M0	NA	NA	FEMALE	Low	Kidney Clear Cell Renal Carcinoma	NA	8310/3	C64.9	YES	NA	NA	Right	N0	YES	NA	0	NA	TUMOR FREE	Elevated	NO	T2	YES	Low	BP	G2	Stage II	KIDNEY
1	4329	K432901A	K432901A.htseq.txt	tumor	0	No	0	0				FALSE	TCGA-BP-4329	75	null	-27699	NA	3121	0	845	749	M0	NA	NA	MALE	Low	Kidney Clear Cell Renal Carcinoma	NA	8310/3	C64.9	YES	NA	NA	Right	N0	YES	NA	0	NA	TUMOR FREE	Normal	NO	T3a	NO	Low	BP	G2	Stage III	KIDNEY
1	4330	K433001A	K433001A.htseq.txt	tumor	0	No	0	0				FALSE	TCGA-BP-4330	60	null	-22262	NA	2986	0	1864	1864	M0	NA	NA	FEMALE	Normal	Kidney Clear Cell Renal Carcinoma	NA	8310/3	C64.9	YES	NA	NA	Left	N0	YES	NA	0	NA	TUMOR FREE	Normal	NO	T3a	NO	Low	BP	G2	Stage III	KIDNEY
3	4332	K433201A	K433201A.htseq.txt	tumor	0	No	0	0				FALSE	TCGA-BP-4332	36	null	-13404	NA	2928	0	1133	1147	M0	NA	NA	MALE	Low	Kidney Clear Cell Renal Carcinoma	NA	8310/3	C64.9	YES	NA	NA	Left	N0	NO	NA	NA	NA	TUMOR FREE	Normal	NO	T3a	NO	Low	BP	G2	Stage III	KIDNEY
3	4334	K433401A	K433401A.htseq.txt	tumor	0	No	0	0				FALSE	TCGA-BP-4334	56	null	-20609	NA	2879	0	645	645	M0	NA	NA	MALE	Low	Kidney Clear Cell Renal Carcinoma	NA	8310/3	C64.9	YES	NA	NA	Right	N0	YES	NA	0	NA	TUMOR FREE	Normal	NO	T3a	NO	Low	BP	G3	Stage III	KIDNEY
1	4335	K433501A	K433501A.htseq.txt	tumor	0	No	0	0				FALSE	TCGA-BP-4335	65	null	-23874	460	2844	0	460	449	M1	NA	NA	FEMALE	Low	Kidney Clear Cell Renal Carcinoma	NA	8310/3	C64.9	YES	NA	NA	Left	N0	NO	NA	NA	NA	WITH TUMOR	Elevated	NO	T3a	NO	Low	BP	G3	Stage IV	KIDNEY
3	4337	K433701A	K433701A.htseq.txt	tumor	0	No	0	0				FALSE	TCGA-BP-4337	76	null	-27905	2	2781	0	2	2	M0	NA	NA	FEMALE	Normal	Kidney Clear Cell Renal Carcinoma	NA	8310/3	C64.9	YES	NA	NA	Left	N0	YES	NA	0	NA	TUMOR FREE	Elevated	NO	T3b	NO	Normal	BP	G4	Stage III	KIDNEY
2	4338	K433801A	K433801A.htseq.txt	tumor	1	Yes	1	0	1	KIF1B_UBE4B	No	FALSE	TCGA-BP-4338	43	null	-15890	NA	2761	0	2746	2746	M0	NA	NA	MALE	Low	Kidney Clear Cell Renal Carcinoma	NA	8310/3	C64.9	YES	NA	NA	Left	N0	NO	NA	NA	NA	TUMOR FREE	Normal	NO	T1b	NO	Low	BP	G3	Stage I	KIDNEY
1	4340	K434001A	K434001A.htseq.txt	tumor	0	No	0	0				FALSE	TCGA-BP-4340	70	null	-25751	562	2698	0	562	42	M0	NA	NA	FEMALE	Low	Kidney Clear Cell Renal Carcinoma	NA	8310/3	C64.9	YES	NA	NA	Right	N0	NO	NA	NA	NA	TUMOR FREE	Low	NO	T1b	NO	Low	BP	G2	Stage I	KIDNEY
1	4341	K434101A	K434101A.htseq.txt	tumor	0	No	0	0				FALSE	TCGA-BP-4341	67	null	-24726	1589	2677	0	1589	1528	M0	NA	NA	MALE	Low	Kidney Clear Cell Renal Carcinoma	NA	8310/3	C64.9	YES	NA	NA	Left	NX	NO	NA	NA	NA	WITH TUMOR	Normal	NO	T3a	NO	Low	BP	G2	Stage III	KIDNEY
2	4342	K434201A	K434201A.htseq.txt	tumor	0	No	0	0				FALSE	TCGA-BP-4342	79	null	-29032	2256	2628	0	2256	2229	M0	NA	NA	MALE	Low	Kidney Clear Cell Renal Carcinoma	NA	8310/3	C64.9	YES	NA	NA	Left	N0	YES	NA	0	NA	WITH TUMOR	Low	YES	T2	YES	NA	BP	G3	Stage II	KIDNEY
2	4343	K434301A	K434301A.htseq.txt	tumor	0	No	0	0				FALSE	TCGA-BP-4343	64	null	-23498	1912	2600	0	1912	1892	M0	NA	NA	MALE	Low	Kidney Clear Cell Renal Carcinoma	NA	8310/3	C64.9	YES	NA	NA	Right	N0	YES	NA	0	NA	WITH TUMOR	Normal	NO	T3a	NO	Low	BP	G3	Stage III	KIDNEY
1	4344	K434401A	K434401A.htseq.txt	tumor	0	No	0	0				FALSE	TCGA-BP-4344	75	null	-27560	NA	1669	0	1666	1666	M0	NA	NA	FEMALE	Low	Kidney Clear Cell Renal Carcinoma	NA	8310/3	C64.9	YES	NA	NA	Right	NX	NO	NA	NA	NA	TUMOR FREE	Normal	YES	T1a	YES	Low	BP	G2	Stage I	KIDNEY
2	4345	K434501A	K434501A.htseq.txt	tumor	0	No	0	0				FALSE	TCGA-BP-4345	62	null	-22986	NA	1590	0	1409	1409	M0	NA	NA	MALE	Normal	Kidney Clear Cell Renal Carcinoma	NA	8310/3	C64.9	YES	NA	NA	Right	N0	YES	NA	0	NA	TUMOR FREE	Normal	NO	T3b	NO	Low	BP	G3	Stage III	KIDNEY
1	4346	K434601A	K434601A.htseq.txt	tumor	0	No	0	0				FALSE	TCGA-BP-4346	57	null	-21065	1485	1682	0	1485	1193	M0	NA	NA	MALE	Low	Kidney Clear Cell Renal Carcinoma	NA	8310/3	C64.9	YES	NA	NA	Right	N0	YES	NA	0	NA	TUMOR FREE	Normal	NO	T3b	NO	Low	BP	G3	Stage III	KIDNEY
1	4347	K434701A	K434701A.htseq.txt	tumor	0	No	0	0				FALSE	TCGA-BP-4347	74	null	-27145	NA	1681	0	1367	1367	M0	NA	NA	MALE	Low	Kidney Clear Cell Renal Carcinoma	NA	8310/3	C64.9	YES	NA	NA	Right	NX	NO	NA	NA	NA	TUMOR FREE	Normal	NO	T3b	NO	Low	BP	G2	Stage III	KIDNEY
1	4349	K434901A	K434901A.htseq.txt	tumor	0	No	0	0				FALSE	TCGA-BP-4349	68	null	-24861	NA	1553	0	364	364	M0	NA	NA	FEMALE	Low	Kidney Clear Cell Renal Carcinoma	NA	8310/3	C64.9	YES	NA	NA	Left	NX	NO	NA	NA	NA	NA	Normal	NO	T1a	NO	Low	BP	G2	Stage I	KIDNEY
3	4351	K435101A	K435101A.htseq.txt	tumor	0	No	0	0				FALSE	TCGA-BP-4351	51	null	-18670	NA	1448	0	961	961	M0	NA	NA	FEMALE	Low	Kidney Clear Cell Renal Carcinoma	NA	8310/3	C64.9	YES	NA	NA	Left	N0	YES	NA	0	NA	WITH TUMOR	Normal	NO	T3a	NO	Low	BP	G2	Stage III	KIDNEY
2	4352	K435201A	K435201A.htseq.txt	tumor	0	No	0	0				FALSE	TCGA-BP-4352	74	null	-27264	332	1150	0	332	287	M1	NA	NA	FEMALE	Low	Kidney Clear Cell Renal Carcinoma	NA	8310/3	C64.9	YES	NA	NA	Right	N0	YES	NA	0	NA	WITH TUMOR	Normal	NO	T3b	NO	Normal	BP	G4	Stage IV	KIDNEY
3	4353	K435301A	K435301A.htseq.txt	tumor	0	No	0	0				FALSE	TCGA-BP-4353	61	null	-22415	375	1167	0	375	365	M0	NA	NA	MALE	Normal	Kidney Clear Cell Renal Carcinoma	NA	8310/3	C64.9	YES	NA	NA	Left	N0	NO	NA	NA	NA	TUMOR FREE	Normal	YES	T1	YES	Low	BP	G2	Stage I	KIDNEY
2	4354	K435401A	K435401A.htseq.txt	tumor	1	Yes	1	0	2	RQCD1_CYP27A1	No	FALSE	TCGA-BP-4354	40	null	-14973	1034	1584	0	1034	973	M1	NA	NA	MALE	Low	Kidney Clear Cell Renal Carcinoma	NA	8310/3	C64.9	YES	NA	Normal	Left	N1	YES	NA	1	NA	WITH TUMOR	Normal	YES	T4	NO	Normal	BP	G4	Stage IV	KIDNEY
1	4355	K435501A	K435501A.htseq.txt	tumor	0	No	0	0				FALSE	TCGA-BP-4355	59	null	-21641	953	1030	0	953	41	M0	NA	NA	FEMALE	Low	Kidney Clear Cell Renal Carcinoma	NA	8310/3	C64.9	YES	NA	NA	Left	NX	NO	NA	NA	NA	NA	Normal	NO	T3a	NO	Low	BP	G4	Stage III	KIDNEY
3	4619	K461901A	K461901A.htseq.txt	tumor	0	No	0	0				FALSE	TCGA-B8-4619	58	null	-21205	NA	239	0	19	19	M0	NA	NA	MALE	Normal	Kidney Clear Cell Renal Carcinoma	NA	8310/3	C64.9	YES	NA	NA	Left	N0	NO	NA	NA	NA	TUMOR FREE	Normal	NO	T1a	NO	Normal	B8	G2	Stage I	KIDNEY
2	4620	K462001A	K462001A.htseq.txt	tumor	1	Yes	1	0	19	DOT1L_SF3A2	No	FALSE	TCGA-B8-4620	70	null	-25786	NA	234	0	226	226	M0	NA	NA	FEMALE	Low	Kidney Clear Cell Renal Carcinoma	NA	8310/3	C64.9	YES	NA	NA	Left	N0	YES	NA	0	NA	TUMOR FREE	Normal	NO	T3a	NO	Normal	B8	G2	Stage III	KIDNEY
3	4621	K462101A	K462101A.htseq.txt	tumor	0	No	0	0				FALSE	TCGA-B8-4621	63	null	-23175	NA	381	0	215	215	M0	NA	NA	MALE	Low	Kidney Clear Cell Renal Carcinoma	NA	8310/3	C64.9	YES	NA	Normal	Left	N0	NO	NA	NA	NA	TUMOR FREE	Normal	NO	T1b	YES	NA	B8	G3	Stage I	KIDNEY
3	4622	K462201A	K462201A.htseq.txt	tumor	0	No	0	0				FALSE	TCGA-B8-4622	57	null	-21135	NA	219	0	181	181	M1	NA	NA	MALE	Low	Kidney Clear Cell Renal Carcinoma	NA	8310/3	C64.9	YES	NA	NA	Left	N0	NO	NA	NA	NA	TUMOR FREE	Normal	NO	T3a	NO	NA	B8	G3	Stage IV	KIDNEY
1	4634	K463401A	K463401A.htseq.txt	tumor	0	No	0	0				FALSE	TCGA-CJ-4634	60	null	-22155	NA	2346	0	1820	1820	M0	NA	NA	FEMALE	Normal	Kidney Clear Cell Renal Carcinoma	NA	8310/3	C64.9	YES	NA	NA	Right	NX	NO	0	0	NA	TUMOR FREE	Normal	NO	T1b	NO	NA	CJ	G2	Stage I	KIDNEY
3	4635	K463501A	K463501A.htseq.txt	tumor	2	Yes	2	0	21.3	COL18A1_ADARB1,RAF1_TMEM40	No	FALSE	TCGA-CJ-4635	48	null	-17620	NA	2333	0	1416	1416	M0	0	NA	MALE	Normal	Kidney Clear Cell Renal Carcinoma	NA	8310/3	C64.9	YES	NA	Elevated	Left	NX	NO	NA	NA	PREOPERATIVE	TUMOR FREE	Normal	NO	T1b	NO	NA	CJ	G3	Stage I	KIDNEY
3	4636	K463601A	K463601A.htseq.txt	tumor	0	No	0	0				FALSE	TCGA-CJ-4636	51	null	-18877	NA	2331	0	1924	1924	M0	0	NA	MALE	Normal	Kidney Clear Cell Renal Carcinoma	NA	8310/3	C64.9	YES	NA	Normal	Right	N0	YES	NA	0	PREOPERATIVE	TUMOR FREE	Normal	NO	T3a	YES	Normal	CJ	G3	Stage III	KIDNEY
2	4637	K463701A	K463701A.htseq.txt	tumor	0	No	0	0				FALSE	TCGA-CJ-4637	52	null	-19101	2227	2297	0	2227	2203	M1	NA	NA	FEMALE	Low	Kidney Clear Cell Renal Carcinoma	NA	8310/3	C64.9	YES	NA	Normal	Left	NX	NO	NA	NA	NA	WITH TUMOR	Elevated	NO	T2b	NO	Normal	CJ	G4	Stage IV	KIDNEY
3	4638	K463801A	K463801A.htseq.txt	tumor	0	No	0	0				FALSE	TCGA-CJ-4638	46	null	-17109	431	2290	0	431	264	M1	NA	NA	FEMALE	Low	Kidney Clear Cell Renal Carcinoma	NA	8310/3	C64.9	YES	NA	Normal	Left	N1	YES	NA	2	NA	WITH TUMOR	Normal	NO	T3a	NO	Elevated	CJ	G4	Stage IV	KIDNEY
1	4639	K463901A	K463901A.htseq.txt	tumor	0	No	0	0				FALSE	TCGA-CJ-4639	49	null	-18066	NA	2267	0	2308	2308	M0	0	NA	FEMALE	Normal	Kidney Clear Cell Renal Carcinoma	NA	8310/3	C64.9	YES	NA	NA	Left	N0	NO	NA	NA	PREOPERATIVE	TUMOR FREE	Normal	NO	T2	NO	NA	CJ	G2	Stage II	KIDNEY
3	4640	K464001A	K464001A.htseq.txt	tumor	0	No	0	0				FALSE	TCGA-CJ-4640	49	null	-18209	NA	2226	0	1966	1966	M0	0	NA	MALE	Normal	Kidney Clear Cell Renal Carcinoma	NA	8310/3	C64.9	YES	NA	NA	Left	N0	NO	NA	NA	PREOPERATIVE	TUMOR FREE	Normal	NO	T3a	NO	NA	CJ	G4	Stage III	KIDNEY
3	4641	K464101A	K464101A.htseq.txt	tumor	0	No	0	0				FALSE	TCGA-CJ-4641	55	null	-20409	1661	1905	0	1661	1617	M1	NA	NA	FEMALE	Normal	Kidney Clear Cell Renal Carcinoma	NA	8310/3	C64.9	YES	NA	Normal	Left	NX	NO	0	0	NA	WITH TUMOR	Normal	NO	T3a	NO	NA	CJ	G4	Stage IV	KIDNEY
1	4643	K464301A	K464301A.htseq.txt	tumor	0	No	0	0				FALSE	TCGA-CJ-4643	67	null	-24477	NA	1879	0	1792	1792	M0	0	NA	FEMALE	Low	Kidney Clear Cell Renal Carcinoma	NA	8310/3	C64.9	YES	NA	Normal	Right	N0	NO	NA	NA	PREOPERATIVE	TUMOR FREE	Elevated	NO	T2b	NO	Normal	CJ	G3	Stage II	KIDNEY
1	4644	K464401A	K464401A.htseq.txt	tumor	0	No	0	0				FALSE	TCGA-CJ-4644	48	null	-17882	336	2325	0	336	334	M1	NA	NA	FEMALE	Low	Kidney Clear Cell Renal Carcinoma	NA	8310/3	C64.9	YES	NA	NA	Left	N0	NO	NA	NA	NA	WITH TUMOR	Elevated	NO	T3a	NO	NA	CJ	G3	Stage IV	KIDNEY
2	4688	K468801A	K468801A.htseq.txt	tumor	3	Yes	1	2	10,13:14,10:9	FBXO18_ITGA8,KIAA1409_LHFP,CCNY_PTPRD	yes	FALSE	TCGA-B0-4688	46	null	-16804	101	889	0	98	98	M1	NA	NA	MALE	Low	Kidney Clear Cell Renal Carcinoma	NA	8310/3	C64.9	YES	NA	NA	Left	N0	NO	0	0	NA	WITH TUMOR	Elevated	NO	T4	NO	Low	B0	G4	Stage IV	KIDNEY
2	4690	K469001A	K469001A.htseq.txt	tumor	3	Yes	3	0	15,15,7	SEMA4B_AP3S2,ZNF710_PLIN1,NUP205_WDR91	No	FALSE	TCGA-B0-4690	65	null	-23978	50	813	0	50	50	M1	NA	NA	MALE	Low	Kidney Clear Cell Renal Carcinoma	NA	8310/3	C64.9	YES	NA	NA	Right	N0	YES	NA	0	NA	WITH TUMOR	Elevated	NO	T3b	NO	Normal	B0	G3	Stage IV	KIDNEY
2	4691	K469101A	K469101A.htseq.txt	tumor	1	Yes	1	0	7	COPG2_TSGA14	No	FALSE	TCGA-B0-4691	55	null	-20137	177	730	0	177	169	M1	NA	NA	MALE	Normal	Kidney Clear Cell Renal Carcinoma	NA	8310/3	C64.9	YES	NA	NA	Left	N0	NO	0	0	NA	WITH TUMOR	Normal	NO	T2	NO	Normal	B0	G3	Stage IV	KIDNEY
1	4693	K469301A	K469301A.htseq.txt	tumor	0	No	0	0				FALSE	TCGA-B0-4693	72	null	-26659	4	464	0	4	4	M0	NA	NA	FEMALE	Low	Kidney Clear Cell Renal Carcinoma	NA	8310/3	C64.9	YES	NA	NA	Left	N0	YES	NA	0	NA	TUMOR FREE	Elevated	NO	T3a	NO	Normal	B0	G4	Stage III	KIDNEY
2	4694	K469401A	K469401A.htseq.txt	tumor	0	No	0	0				FALSE	TCGA-B0-4694	72	null	-26509	178	735	0	178	75	M0	NA	NA	MALE	Low	Kidney Clear Cell Renal Carcinoma	NA	8310/3	C64.9	YES	NA	NA	Left	NX	NO	0	0	NA	TUMOR FREE	Low	NO	T3b	NO	Normal	B0	G4	Stage III	KIDNEY
2	4696	K469601A	K469601A.htseq.txt	tumor	1	Yes	1	0	9	CNTLN_RFX3	No	FALSE	TCGA-B0-4696	58	null	-21317	866	3500	0	866	836	M0	NA	NA	MALE	Low	Kidney Clear Cell Renal Carcinoma	NA	8310/3	C64.9	YES	NA	NA	Left	N0	NO	0	0	NA	WITH TUMOR	Normal	NO	T3a	NO	Normal	B0	G3	Stage III	KIDNEY
2	4697	K469701A	K469701A.htseq.txt	tumor	0	No	0	0				FALSE	TCGA-B0-4697	46	null	-16804	620	2664	0	618	417	M1	NA	NA	FEMALE	Low	Kidney Clear Cell Renal Carcinoma	NA	8310/3	C64.9	YES	NA	NA	Right	NX	NO	0	0	NA	WITH TUMOR	Normal	NO	T3b	NO	Low	B0	G4	Stage IV	KIDNEY
2	4698	K469801A	K469801A.htseq.txt	tumor	0	No	0	0				FALSE	TCGA-B0-4698	75	null	-27417	42	2853	0	42	42	M0	NA	NA	MALE	Low	Kidney Clear Cell Renal Carcinoma	NA	8310/3	C64.9	YES	NA	NA	Left	NX	YES	NA	0	NA	WITH TUMOR	Normal	NO	T4	NO	Normal	B0	G4	Stage IV	KIDNEY
3	4699	K469901A	K469901A.htseq.txt	tumor	1	Yes	0	1	11:19:00	TSPAN18_BCL2L12	No	FALSE	TCGA-B0-4699	74	null	-27225	109	2570	0	109	109	M1	NA	NA	MALE	Low	Kidney Clear Cell Renal Carcinoma	NA	8310/3	C64.9	YES	NA	NA	Right	N0	YES	NA	0	NA	TUMOR FREE	Elevated	NO	T4	NO	Low	B0	G4	Stage IV	KIDNEY
2	4700	K470001A	K470001A.htseq.txt	tumor	0	No	0	0				FALSE	TCGA-B0-4700	60	null	-22031	1982	2760	0	NA	NA	M1	NA	NA	MALE	Low	Kidney Clear Cell Renal Carcinoma	NA	8310/3	C64.9	YES	NA	NA	Right	N1	NO	NA	NA	NA	WITH TUMOR	Normal	NO	T4	NO	Normal	B0	G4	Stage IV	KIDNEY
1	4701	K470101A	K470101A.htseq.txt	tumor	0	No	0	0				FALSE	TCGA-B0-4701	66	null	-24183	286	2275	0	257	257	M1	NA	NA	FEMALE	Normal	Kidney Clear Cell Renal Carcinoma	NA	8310/3	C64.9	YES	NA	NA	Left	N0	YES	NA	0	NA	WITH TUMOR	Normal	NO	T3a	NO	Normal	B0	G3	Stage IV	KIDNEY
2	4703	K470301A	K470301A.htseq.txt	tumor	0	No	0	0				FALSE	TCGA-B0-4703	51	null	-18921	182	2039	0	182	52	M1	NA	NA	MALE	Low	Kidney Clear Cell Renal Carcinoma	NA	8310/3	C64.9	YES	NA	NA	Left	N0	NO	0	0	NA	WITH TUMOR	Elevated	NO	T3a	NO	Normal	B0	G4	Stage IV	KIDNEY
1	4706	K470601A	K470601A.htseq.txt	tumor	1	Yes	1	0	3	HEG1_SLC12A8	No	FALSE	TCGA-B0-4706	61	null	-22331	65	1272	0	26	26	M0	NA	NA	MALE	Low	Kidney Clear Cell Renal Carcinoma	NA	8310/3	C64.9	YES	NA	NA	Left	NX	NO	NA	NA	NA	TUMOR FREE	Low	NO	T3a	NO	Elevated	B0	G4	Stage III	KIDNEY
2	4712	K471201A	K471201A.htseq.txt	tumor	0	No	0	0				FALSE	TCGA-B0-4712	76	null	-28094	1337	1622	0	1337	1264	M1	NA	NA	MALE	Low	Kidney Clear Cell Renal Carcinoma	NA	8310/3	C64.9	YES	NA	NA	Left	NX	NO	NA	NA	NA	WITH TUMOR	Normal	NO	T3a	YES	Normal	B0	G3	Stage IV	KIDNEY
3	4713	K471301A	K471301A.htseq.txt	tumor	1	Yes	1	0	17	SPOP_FAM117A	No	FALSE	TCGA-B0-4713	76	null	-27834	266	443	0	266	147	M0	NA	NA	FEMALE	Elevated	Kidney Clear Cell Renal Carcinoma	NA	8310/3	C64.9	YES	NA	NA	Right	NX	NO	0	0	NA	WITH TUMOR	Normal	NO	T3b	NO	Elevated	B0	G2	Stage III	KIDNEY
1	4714	K471401A	K471401A.htseq.txt	tumor	0	No	0	0				FALSE	TCGA-B0-4714	81	null	-29873	98	357	0	3	3	M1	NA	NA	MALE	NA	Kidney Clear Cell Renal Carcinoma	NA	8310/3	C64.9	YES	NA	NA	Right	NX	YES	NA	0	NA	WITH TUMOR	NA	NO	T3b	NO	NA	B0	G3	Stage IV	KIDNEY
1	4718	K471801A	K471801A.htseq.txt	tumor	0	No	0	0				FALSE	TCGA-B0-4718	57	null	-20910	NA	341	0	214	214	M0	NA	NA	MALE	Low	Kidney Clear Cell Renal Carcinoma	NA	8310/3	C64.9	YES	NA	NA	Left	NX	NO	0	0	NA	TUMOR FREE	Normal	NO	T3a	NO	Low	B0	G2	Stage IV	KIDNEY
3	3313	K331301A	K331301A.htseq.txt	tumor	10	Yes	10	0	6,6,6,6,6,6,6,6,6,6	MOCS1_BTBD9,C6orf138_CD2AP,TAF8_KHDRBS2,TFEB_KHDRBS2,MRPS18A_KIF6,CYP39A1_LEMD2,C6orf106_LRRC1,XPO5_MRPS10,PKHD1_RCAN2,CD2AP_USP49	Yes	TRUE	TCGA-A3-3313	59	null	-21550	735	1758	0	735	651	M0	NA	NA	MALE	Low	Kidney Clear Cell Renal Carcinoma	NA	8310/3	C64.9	YES	NA	NA	Right	N0	NA	NA	NA	NA	TUMOR FREE	NA	NO	T1b	NO	NA	A3	G3	Stage I	KIDNEY
3	3456	K345601A	K345601A.htseq.txt	tumor	2	Yes	0	2	01:23:01.100000	TFE3_SFPQ,SFPQ_TFE3	Yes	TRUE	TCGA-AK-3456	48	null	-17821	NA	1374	0	46	46	M0	NA	NA	MALE	Low	Kidney Clear Cell Renal Carcinoma	NA	8310/3	C64.9	YES	NA	NA	Right	N0	YES	NA	1	NA	NA	Normal	NO	T2	NO	Normal	AK	G3	Stage II	KIDNEY
1	4759	K475901A	K475901A.htseq.txt	tumor	0	No	0	0				FALSE	TCGA-BP-4759	50	null	-18569	NA	2353	0	2324	2324	M0	NA	NA	MALE	Normal	Kidney Clear Cell Renal Carcinoma	NA	8310/3	C64.9	YES	NA	NA	Left	NX	NO	NA	NA	NA	TUMOR FREE	Normal	NO	T1a	NO	Low	BP	G2	Stage I	KIDNEY
3	4760	K476001A	K476001A.htseq.txt	tumor	0	No	0	0				FALSE	TCGA-BP-4760	69	null	-25268	NA	2300	0	2249	2249	M0	NA	NA	MALE	Normal	Kidney Clear Cell Renal Carcinoma	NA	8310/3	C64.9	YES	NA	NA	Left	NX	NO	NA	NA	NA	WITH TUMOR	Normal	NO	T1a	YES	Low	BP	G2	Stage I	KIDNEY
2	4761	K476101A	K476101A.htseq.txt	tumor	4	Yes	4	0	19,16,13,12	TGFB1_CCDC97,SNTB2_CIRH1A,TRIM13_DLEU1,CBX5_NFE2	No	FALSE	TCGA-BP-4761	57	null	-21018	NA	2296	0	182	902	M0	NA	NA	MALE	Low	Kidney Clear Cell Renal Carcinoma	NA	8310/3	C64.9	YES	NA	NA	Right	N1	YES	NA	2	NA	TUMOR FREE	Normal	NO	T3a	NO	Low	BP	G4	Stage III	KIDNEY
1	4762	K476201A	K476201A.htseq.txt	tumor	0	No	0	0				FALSE	TCGA-BP-4762	42	null	-15358	1343	2284	0	1343	1299	M0	NA	NA	MALE	Low	Kidney Clear Cell Renal Carcinoma	NA	8310/3	C64.9	YES	NA	NA	Left	NX	NO	NA	NA	NA	TUMOR FREE	Normal	NO	T1a	YES	Low	BP	G3	Stage I	KIDNEY
3	4763	K476301A	K476301A.htseq.txt	tumor	0	No	0	0				FALSE	TCGA-BP-4763	79	null	-29149	1270	2283	0	1270	985	M0	NA	NA	FEMALE	Low	Kidney Clear Cell Renal Carcinoma	NA	8310/3	C64.9	YES	NA	NA	Right	NX	NO	NA	NA	NA	TUMOR FREE	Normal	NO	T1a	NO	Low	BP	G2	Stage I	KIDNEY
1	4765	K476501A	K476501A.htseq.txt	tumor	0	No	0	0				FALSE	TCGA-BP-4765	43	null	-15814	NA	2247	0	2184	2184	M0	NA	NA	MALE	Normal	Kidney Clear Cell Renal Carcinoma	NA	8310/3	C64.9	YES	NA	NA	Right	NX	NO	NA	NA	NA	TUMOR FREE	Normal	NO	T1a	NO	Low	BP	G2	Stage I	KIDNEY
1	4766	K476601A	K476601A.htseq.txt	tumor	0	No	0	0				FALSE	TCGA-BP-4766	43	null	-15793	NA	2252	0	1467	1467	M0	NA	NA	FEMALE	Low	Kidney Clear Cell Renal Carcinoma	NA	8310/3	C64.9	YES	NA	NA	Right	NX	NO	NA	NA	NA	TUMOR FREE	Normal	NO	T1a	NO	Low	BP	G3	Stage I	KIDNEY
3	4768	K476801A	K476801A.htseq.txt	tumor	0	No	0	0				FALSE	TCGA-BP-4768	72	null	-26474	NA	2191	0	400	400	M0	NA	NA	FEMALE	Low	Kidney Clear Cell Renal Carcinoma	NA	8310/3	C64.9	YES	NA	NA	Left	N0	YES	NA	0	NA	TUMOR FREE	Low	NO	T1a	NO	Low	BP	G2	Stage I	KIDNEY
3	4769	K476901A	K476901A.htseq.txt	tumor	0	No	0	0				FALSE	TCGA-BP-4769	63	null	-23190	NA	2186	0	1876	1876	M0	NA	NA	MALE	Low	Kidney Clear Cell Renal Carcinoma	NA	8310/3	C64.9	YES	NA	NA	Left	NX	NO	NA	NA	NA	TUMOR FREE	Normal	NO	T1a	NO	Normal	BP	G2	Stage I	KIDNEY
2	4770	K477001A	K477001A.htseq.txt	tumor	0	No	0	0				FALSE	TCGA-BP-4770	73	null	-26824	329	2290	0	329	311	M0	NA	NA	FEMALE	Low	Kidney Clear Cell Renal Carcinoma	NA	8310/3	C64.9	YES	NA	Normal	Left	N0	YES	NA	0	NA	WITH TUMOR	Normal	NO	T4	NO	Low	BP	G4	Stage IV	KIDNEY
3	4771	K477101A	K477101A.htseq.txt	tumor	0	No	0	0				FALSE	TCGA-BP-4771	62	null	-22771	161	2171	0	161	142	M1	NA	NA	MALE	Normal	Kidney Clear Cell Renal Carcinoma	NA	8310/3	C64.9	YES	NA	NA	Right	N0	YES	NA	0	NA	TUMOR FREE	Normal	YES	T3a	NO	Low	BP	G4	Stage IV	KIDNEY
1	4774	K477401A	K477401A.htseq.txt	tumor	0	No	0	0				FALSE	TCGA-BP-4774	57	null	-20827	NA	2132	0	1884	1884	M0	NA	NA	FEMALE	Normal	Kidney Clear Cell Renal Carcinoma	NA	8310/3	C64.9	YES	NA	NA	Right	NX	NO	NA	NA	NA	TUMOR FREE	Normal	NO	T1a	NO	Low	BP	G2	Stage I	KIDNEY
1	4775	K477501A	K477501A.htseq.txt	tumor	0	No	0	0				FALSE	TCGA-BP-4775	55	null	-20369	NA	2132	0	1842	1842	M0	NA	NA	FEMALE	Low	Kidney Clear Cell Renal Carcinoma	NA	8310/3	C64.9	YES	NA	NA	Left	NX	NO	NA	NA	NA	WITH TUMOR	Normal	NO	T1a	YES	Low	BP	G2	Stage I	KIDNEY
1	4777	K477701A	K477701A.htseq.txt	tumor	0	No	0	0				FALSE	TCGA-BP-4777	46	null	-17133	NA	2101	0	1731	1731	M0	NA	NA	MALE	Low	Kidney Clear Cell Renal Carcinoma	NA	8310/3	C64.9	YES	NA	NA	Right	NX	NO	NA	NA	NA	TUMOR FREE	Normal	NO	T1a	NO	Low	BP	G3	Stage I	KIDNEY
2	4781	K478101A	K478101A.htseq.txt	tumor	0	No	0	0				FALSE	TCGA-BP-4781	78	null	-28700	NA	2120	0	2080	2080	M0	NA	NA	MALE	Low	Kidney Clear Cell Renal Carcinoma	NA	8310/3	C64.9	YES	NA	NA	Right	NX	NO	NA	NA	NA	TUMOR FREE	Low	NO	T1a	NO	Low	BP	G3	Stage I	KIDNEY
3	4782	K478201A	K478201A.htseq.txt	tumor	2	Yes	1	1	12,2:8	VPS33A_CLIP1,ASB1_CLVS1	No	FALSE	TCGA-BP-4782	54	null	-19962	NA	2160	0	493	559	M0	NA	NA	FEMALE	Low	Kidney Clear Cell Renal Carcinoma	NA	8310/3	C64.9	YES	NA	NA	Right	NX	NO	NA	NA	NA	WITH TUMOR	Normal	NO	T1a	NO	Low	BP	G2	Stage I	KIDNEY
3	4784	K478401A	K478401A.htseq.txt	tumor	0	No	0	0				FALSE	TCGA-BP-4784	67	null	-24603	NA	2062	0	1854	1854	M0	NA	NA	FEMALE	Normal	Kidney Clear Cell Renal Carcinoma	NA	8310/3	C64.9	YES	NA	Normal	Right	NX	NO	NA	NA	NA	TUMOR FREE	Normal	NO	T1a	NO	Normal	BP	G2	Stage I	KIDNEY
2	4787	K478701A	K478701A.htseq.txt	tumor	0	No	0	0				FALSE	TCGA-BP-4787	59	null	-21697	479	1570	0	479	465	M1	NA	NA	FEMALE	Low	Kidney Clear Cell Renal Carcinoma	NA	8310/3	C64.9	YES	NA	Normal	Left	N0	YES	NA	0	NA	WITH TUMOR	Elevated	NO	T3a	NO	Normal	BP	G4	Stage IV	KIDNEY
1	4789	K478901A	K478901A.htseq.txt	tumor	0	No	0	0				FALSE	TCGA-BP-4789	48	null	-17539	NA	1515	0	1489	1489	M0	NA	NA	MALE	Normal	Kidney Clear Cell Renal Carcinoma	NA	8310/3	C64.9	YES	NA	NA	Right	NX	NO	NA	NA	NA	TUMOR FREE	Normal	NO	T1a	NO	Normal	BP	G2	Stage I	KIDNEY
3	4790	K479001A	K479001A.htseq.txt	tumor	0	No	0	0				FALSE	TCGA-BP-4790	76	null	-28076	1111	1502	0	1111	48	M0	NA	NA	MALE	Normal	Kidney Clear Cell Renal Carcinoma	NA	8310/3	C64.9	YES	NA	NA	Right	NX	NO	NA	NA	NA	TUMOR FREE	Normal	NO	T1a	NO	Normal	BP	G2	Stage I	KIDNEY
3	4795	K479501A	K479501A.htseq.txt	tumor	0	No	0	0				FALSE	TCGA-BP-4795	74	null	-27161	NA	1310	0	620	620	M0	NA	NA	FEMALE	Low	Kidney Clear Cell Renal Carcinoma	NA	8310/3	C64.9	YES	NA	NA	Right	N0	YES	NA	0	NA	TUMOR FREE	Normal	NO	T1a	NO	Low	BP	G2	Stage I	KIDNEY
3	4797	K479701A	K479701A.htseq.txt	tumor	0	No	0	0				FALSE	TCGA-BP-4797	34	null	-12507	NA	1390	0	1107	1107	M0	NA	NA	MALE	Normal	Kidney Clear Cell Renal Carcinoma	NA	8310/3	C64.9	YES	NA	NA	Right	N0	YES	NA	0	NA	TUMOR FREE	Normal	NO	T3b	NO	Normal	BP	G3	Stage III	KIDNEY
2	4798	K479801A	K479801A.htseq.txt	tumor	0	No	0	0				FALSE	TCGA-BP-4798	74	null	-27334	334	1351	0	334	22	M1	NA	NA	MALE	Low	Kidney Clear Cell Renal Carcinoma	NA	8310/3	C64.9	YES	NA	NA	Left	N0	YES	NA	0	NA	WITH TUMOR	Elevated	NO	T3b	NO	Normal	BP	G4	Stage III	KIDNEY
2	4799	K479901A	K479901A.htseq.txt	tumor	0	No	0	0				FALSE	TCGA-BP-4799	70	null	-25841	1133	1329	0	1133	759	M0	NA	NA	MALE	Normal	Kidney Clear Cell Renal Carcinoma	NA	8310/3	C64.9	YES	NA	NA	Right	N0	YES	NA	0	NA	WITH TUMOR	Normal	NO	T3b	YES	Normal	BP	G3	Stage III	KIDNEY
3	4801	K480101A	K480101A.htseq.txt	tumor	0	No	0	0				FALSE	TCGA-BP-4801	57	null	-20824	NA	1178	0	1124	1124	M0	NA	NA	MALE	Low	Kidney Clear Cell Renal Carcinoma	NA	8310/3	C64.9	YES	NA	NA	Left	NX	NO	NA	NA	NA	TUMOR FREE	Normal	NO	T1a	NO	Low	BP	G2	Stage I	KIDNEY
3	4803	K480301A	K480301A.htseq.txt	tumor	0	No	0	0				FALSE	TCGA-BP-4803	42	null	-15665	168	1312	0	168	162	M0	NA	NA	MALE	Normal	Kidney Clear Cell Renal Carcinoma	NA	8310/3	C64.9	YES	NA	NA	Right	N0	YES	NA	0	NA	WITH TUMOR	Normal	NO	T3b	NO	Normal	BP	G4	Stage III	KIDNEY
2	4804	K480401A	K480401A.htseq.txt	tumor	0	No	0	0				FALSE	TCGA-BP-4804	57	null	-20820	NA	1299	0	1128	1128	M0	NA	NA	MALE	Normal	Kidney Clear Cell Renal Carcinoma	NA	8310/3	C64.9	YES	NA	NA	Left	NX	NO	NA	NA	NA	TUMOR FREE	Normal	NO	T1a	NO	Normal	BP	G2	Stage I	KIDNEY
3	4807	K480701A	K480701A.htseq.txt	tumor	0	No	0	0				FALSE	TCGA-BP-4807	42	null	-15359	NA	1155	0	211	389	M0	NA	NA	MALE	Normal	Kidney Clear Cell Renal Carcinoma	NA	8310/3	C64.9	YES	NA	NA	Right	NX	NO	NA	NA	NA	TUMOR FREE	Normal	NO	T1a	YES	Normal	BP	G3	Stage I	KIDNEY
2	4810	K481001A	K481001A.htseq.txt	tumor	1	Yes	0	1	03:05:00	C3orf1_RFESD	No	FALSE	TCGA-B0-4810	47	null	-17390	489	3708	0	278	278	M0	NA	NA	MALE	Low	Kidney Clear Cell Renal Carcinoma	NA	8310/3	C64.9	YES	NA	NA	Left	N1	YES	NA	2	NA	WITH TUMOR	Elevated	NO	T3	NO	NA	B0	G3	Stage IV	KIDNEY
1	4811	K481101A	K481101A.htseq.txt	tumor	0	No	0	0				FALSE	TCGA-B0-4811	48	null	-17772	1437	3595	0	1216	1216	M0	NA	NA	MALE	Normal	Kidney Clear Cell Renal Carcinoma	NA	8310/3	C64.9	YES	NA	NA	Left	N0	YES	NA	0	NA	WITH TUMOR	NA	NO	T3	NO	Normal	B0	G4	Stage III	KIDNEY
2	4813	K481301A	K481301A.htseq.txt	tumor	0	No	0	0				FALSE	TCGA-B0-4813	68	null	-25017	18	3401	0	18	18	M0	NA	NA	MALE	Low	Kidney Clear Cell Renal Carcinoma	NA	8310/3	C64.9	YES	NA	NA	Right	NX	NO	0	0	NA	TUMOR FREE	Low	NO	T3b	NO	Normal	B0	G3	Stage III	KIDNEY
1	4814	K481401A	K481401A.htseq.txt	tumor	0	No	0	0				FALSE	TCGA-B0-4814	58	null	-21326	216	3433	0	95	95	M1	NA	NA	MALE	Low	Kidney Clear Cell Renal Carcinoma	NA	8310/3	C64.9	YES	NA	NA	Right	N0	NO	0	0	NA	WITH TUMOR	Normal	NO	T4	NO	Low	B0	G2	Stage IV	KIDNEY
2	4815	K481501A	K481501A.htseq.txt	tumor	1	Yes	1	0	12	MAPKAPK5_ACAD10	No	FALSE	TCGA-B0-4815	65	null	-23859	1601	3422	0	1505	1505	M0	NA	NA	MALE	Low	Kidney Clear Cell Renal Carcinoma	NA	8310/3	C64.9	YES	NA	NA	Left	NX	NA	NA	NA	NA	WITH TUMOR	NA	NO	T3a	NO	Normal	B0	G3	Stage III	KIDNEY
3	4816	K481601A	K481601A.htseq.txt	tumor	0	No	0	0				FALSE	TCGA-B0-4816	49	null	-18133	1370	3351	0	1081	1081	M0	NA	NA	MALE	Low	Kidney Clear Cell Renal Carcinoma	NA	8310/3	C64.9	YES	NA	NA	Left	N0	NA	NA	NA	NA	WITH TUMOR	Low	NO	T2	NO	Low	B0	GX	Stage II	KIDNEY
2	4817	K481701A	K481701A.htseq.txt	tumor	0	No	0	0				FALSE	TCGA-B0-4817	81	null	-29873	1019	3263	0	848	848	M0	NA	NA	MALE	Low	Kidney Clear Cell Renal Carcinoma	NA	8310/3	C64.9	YES	NA	NA	Right	N0	NO	0	0	NA	TUMOR FREE	Low	NO	T3c	NO	Low	B0	GX	Stage III	KIDNEY
1	4818	K481801A	K481801A.htseq.txt	tumor	0	No	0	0				FALSE	TCGA-B0-4818	67	null	-24774	588	3353	0	504	504	M0	NA	NA	FEMALE	Low	Kidney Clear Cell Renal Carcinoma	NA	8310/3	C64.9	YES	NA	NA	Right	NX	NO	NA	NA	NA	WITH TUMOR	Normal	NO	T2	NO	NA	B0	G3	Stage IV	KIDNEY
2	4819	K481901A	K481901A.htseq.txt	tumor	0	No	0	0				FALSE	TCGA-B0-4819	60	null	-22220	61	3210	0	61	6	M1	NA	NA	FEMALE	Normal	Kidney Clear Cell Renal Carcinoma	NA	8310/3	C64.9	YES	NA	NA	Right	NX	NO	0	0	NA	TUMOR FREE	Low	NO	T3b	NO	Normal	B0	GX	Stage IV	KIDNEY
2	4821	K482101A	K482101A.htseq.txt	tumor	0	No	0	0				FALSE	TCGA-B0-4821	68	null	-25013	1229	3286	0	1229	1186	M0	NA	NA	FEMALE	Normal	Kidney Clear Cell Renal Carcinoma	NA	8310/3	C64.9	YES	NA	NA	Left	N0	YES	NA	0	NA	WITH TUMOR	NA	NO	T3b	NO	NA	B0	G3	Stage III	KIDNEY
3	4823	K482301A	K482301A.htseq.txt	tumor	0	No	0	0				FALSE	TCGA-B0-4823	88	null	-32289	454	3111	0	454	454	M0	NA	NA	MALE	Low	Kidney Clear Cell Renal Carcinoma	NA	8310/3	C64.9	YES	NA	NA	Right	N0	NO	0	0	NA	TUMOR FREE	Normal	NO	T1	NO	Low	B0	G2	Stage I	KIDNEY
1	4824	K482401A	K482401A.htseq.txt	tumor	0	No	0	0				FALSE	TCGA-B0-4824	49	null	-18131	1657	3101	0	1463	1463	M0	NA	NA	FEMALE	Low	Kidney Clear Cell Renal Carcinoma	NA	8310/3	C64.9	YES	NA	NA	Left	N0	NO	0	0	NA	TUMOR FREE	Normal	NO	T1	NO	Low	B0	G3	Stage I	KIDNEY
2	4827	K482701A	K482701A.htseq.txt	tumor	0	No	0	0				FALSE	TCGA-B0-4827	77	null	-28467	884	3013	0	884	884	M0	NA	NA	FEMALE	Low	Kidney Clear Cell Renal Carcinoma	NA	8310/3	C64.9	YES	NA	NA	Left	N0	NO	0	0	NA	WITH TUMOR	Normal	NO	T3b	NO	Low	B0	G4	Stage III	KIDNEY
1	4828	K482801A	K482801A.htseq.txt	tumor	0	No	0	0				FALSE	TCGA-B0-4828	79	null	-28948	307	2945	0	307	9	M1	NA	NA	MALE	Low	Kidney Clear Cell Renal Carcinoma	NA	8310/3	C64.9	YES	NA	NA	Left	NX	NO	0	0	NA	WITH TUMOR	Normal	NO	T2	NO	Low	B0	GX	Stage IV	KIDNEY
1	4833	K483301A	K483301A.htseq.txt	tumor	0	No	0	0				FALSE	TCGA-B0-4833	82	null	-30190	2385	2892	0	2385	1948	M0	NA	NA	FEMALE	Normal	Kidney Clear Cell Renal Carcinoma	NA	8310/3	C64.9	YES	NA	NA	Left	N0	NO	0	0	NA	WITH TUMOR	Normal	NO	T1	NO	Normal	B0	GX	Stage I	KIDNEY
3	4834	K483401A	K483401A.htseq.txt	tumor	0	No	0	0				FALSE	TCGA-B0-4834	49	null	-18224	2090	2859	0	2090	1535	M0	NA	NA	MALE	Low	Kidney Clear Cell Renal Carcinoma	NA	8310/3	C64.9	YES	NA	NA	Right	N0	NO	0	0	NA	TUMOR FREE	Normal	NO	T1a	NO	Normal	B0	G3	Stage I	KIDNEY
2	4836	K483601A	K483601A.htseq.txt	tumor	1	Yes	1	0	6	TMEM63B_MRPL14	No	FALSE	TCGA-B0-4836	61	null	-22487	1239	2758	0	1238	1236	M1	NA	NA	MALE	Normal	Kidney Clear Cell Renal Carcinoma	NA	8310/3	C64.9	YES	NA	NA	Right	NX	NO	0	0	NA	WITH TUMOR	Normal	NO	T3b	NO	Normal	B0	GX	Stage IV	KIDNEY
2	4837	K483701A	K483701A.htseq.txt	tumor	0	No	0	0				FALSE	TCGA-B0-4837	63	null	-23129	1378	2672	0	1292	1292	M0	NA	NA	MALE	Low	Kidney Clear Cell Renal Carcinoma	NA	8310/3	C64.9	YES	NA	NA	Left	N0	NO	0	0	NA	WITH TUMOR	Normal	NO	T1b	NO	Normal	B0	G3	Stage I	KIDNEY
1	4838	K483801A	K483801A.htseq.txt	tumor	0	No	0	0				FALSE	TCGA-B0-4838	69	null	-25268	834	2655	0	728	728	M0	NA	NA	FEMALE	Low	Kidney Clear Cell Renal Carcinoma	NA	8310/3	C64.9	YES	90	NA	Right	N0	NO	0	0	NA	TUMOR FREE	Low	NO	T1	NO	Low	B0	G3	Stage I	KIDNEY
3	4839	K483901A	K483901A.htseq.txt	tumor	0	No	0	0				FALSE	TCGA-B0-4839	80	null	-29380	1638	2624	0	1638	1412	M0	NA	NA	FEMALE	Normal	Kidney Clear Cell Renal Carcinoma	NA	8310/3	C64.9	YES	NA	NA	Left	N0	NO	0	0	NA	TUMOR FREE	Normal	NO	T1b	NO	Normal	B0	GX	Stage I	KIDNEY
1	4841	K484101A	K484101A.htseq.txt	tumor	0	No	0	0				FALSE	TCGA-B0-4841	63	null	-23055	245	2611	0	181	181	M1	NA	NA	MALE	Low	Kidney Clear Cell Renal Carcinoma	NA	8310/3	C64.9	YES	NA	NA	Left	NX	NO	0	0	NA	WITH TUMOR	Normal	NO	T2	NO	Low	B0	G3	Stage IV	KIDNEY
2	4842	K484201A	K484201A.htseq.txt	tumor	1	Yes	1	0	5	CLPTM1L_SLC6A18	No	FALSE	TCGA-B0-4842	73	null	-26972	1770	2618	0	1683	1683	M0	NA	NA	FEMALE	Low	Kidney Clear Cell Renal Carcinoma	NA	8310/3	C64.9	YES	NA	NA	Right	N0	NO	0	0	NA	WITH TUMOR	Low	NO	T3a	NO	Low	B0	G3	Stage III	KIDNEY
2	4843	K484301A	K484301A.htseq.txt	tumor	0	No	0	0				FALSE	TCGA-B0-4843	57	null	-21055	353	2581	0	353	336	M0	NA	NA	MALE	Normal	Kidney Clear Cell Renal Carcinoma	NA	8310/3	C64.9	YES	NA	NA	Right	N0	NO	0	0	NA	WITH TUMOR	Normal	NO	T3a	NO	Low	B0	GX	Stage III	KIDNEY
3	4844	K484401A	K484401A.htseq.txt	tumor	0	No	0	0				FALSE	TCGA-B0-4844	60	null	-22220	313	2558	0	313	253	M1	NA	NA	MALE	Low	Kidney Clear Cell Renal Carcinoma	NA	8310/3	C64.9	YES	NA	NA	Left	NX	NO	0	0	NA	WITH TUMOR	Normal	NO	T3a	NO	Low	B0	G3	Stage IV	KIDNEY
1	4845	K484501A	K484501A.htseq.txt	tumor	0	No	0	0				FALSE	TCGA-B0-4845	70	null	-25582	1985	2938	0	1985	1668	M1	NA	NA	MALE	Low	Kidney Clear Cell Renal Carcinoma	NA	8310/3	C64.9	YES	NA	NA	Right	NX	YES	NA	0	NA	WITH TUMOR	Elevated	NO	T3	NO	Low	B0	GX	Stage IV	KIDNEY
1	4846	K484601A	K484601A.htseq.txt	tumor	0	No	0	0				FALSE	TCGA-B0-4846	52	null	-19117	1221	2560	0	1221	69	M1	NA	NA	MALE	Normal	Kidney Clear Cell Renal Carcinoma	NA	8310/3	C64.9	YES	NA	NA	Right	N0	NO	0	0	NA	WITH TUMOR	Normal	NO	T3a	NO	Normal	B0	G2	Stage IV	KIDNEY
1	4847	K484701A	K484701A.htseq.txt	tumor	0	No	0	0				FALSE	TCGA-B0-4847	60	null	-22107	832	2565	0	832	832	M1	NA	NA	MALE	Low	Kidney Clear Cell Renal Carcinoma	NA	8310/3	C64.9	YES	NA	Normal	Left	NX	NO	0	0	NA	TUMOR FREE	Normal	NO	T3	NO	Normal	B0	G3	Stage III	KIDNEY
2	4848	K484801A	K484801A.htseq.txt	tumor	0	No	0	0				FALSE	TCGA-B0-4848	54	null	-19844	930	2567	0	930	541	M0	NA	NA	MALE	Low	Kidney Clear Cell Renal Carcinoma	NA	8310/3	C64.9	YES	NA	Normal	Left	NX	NO	0	0	NA	WITH TUMOR	Normal	NO	T3b	NO	Normal	B0	G3	Stage III	KIDNEY
1	4849	K484901A	K484901A.htseq.txt	tumor	1	Yes	1	0	14	KIAA0391_FAM177A1	No	FALSE	TCGA-B0-4849	51	null	-18842	69	2427	0	69	16	M0	NA	NA	MALE	Elevated	Kidney Clear Cell Renal Carcinoma	NA	8310/3	C64.9	YES	NA	NA	Left	NX	NO	0	0	NA	WITH TUMOR	Normal	NO	T3a	NO	Normal	B0	G3	Stage III	KIDNEY
1	4852	K485201A	K485201A.htseq.txt	tumor	0	No	0	0				FALSE	TCGA-B0-4852	78	null	-28552	1121	2283	0	1079	1079	M0	NA	NA	FEMALE	Low	Kidney Clear Cell Renal Carcinoma	NA	8310/3	C64.9	YES	NA	NA	Left	N0	NA	NA	NA	NA	WITH TUMOR	Elevated	NO	T2	NO	Low	B0	G2	Stage II	KIDNEY
1	4853	K485301A	K485301A.htseq.txt	tumor	0	No	0	0				FALSE	TCGA-CZ-4853	82	null	-30190	NA	2009	0	774	774	M0	NA	NA	MALE	Low	Kidney Clear Cell Renal Carcinoma	NA	8310/3	C64.9	YES	NA	NA	Right	NX	NO	0	0	NA	TUMOR FREE	Normal	NO	T1a	NO	Low	CZ	G2	Stage I	KIDNEY
2	4854	K485401A	K485401A.htseq.txt	tumor	0	No	0	0				FALSE	TCGA-CZ-4854	68	null	-24876	1404	1998	0	1404	669	M0	0	NA	MALE	Low	Kidney Clear Cell Renal Carcinoma	NA	8310/3	C64.9	YES	100	NA	Right	N0	YES	NA	0	PREOPERATIVE	TUMOR FREE	Low	NO	T1b	YES	Low	CZ	G2	Stage I	KIDNEY
1	4856	K485601A	K485601A.htseq.txt	tumor	0	No	0	0				FALSE	TCGA-CZ-4856	62	null	-22684	NA	1956	0	18	18	M0	0	NA	FEMALE	Normal	Kidney Clear Cell Renal Carcinoma	NA	8310/3	C64.9	YES	90	NA	Left	N0	YES	NA	0	PREOPERATIVE	NA	Normal	NO	T1b	YES	Low	CZ	G2	Stage I	KIDNEY
2	4857	K485701A	K485701A.htseq.txt	tumor	0	No	0	0				FALSE	TCGA-CZ-4857	56	null	-20717	1432	1964	0	1432	802	M1	0	NA	MALE	Low	Kidney Clear Cell Renal Carcinoma	NA	8310/3	C64.9	YES	NA	NA	Right	N0	YES	NA	0	PREOPERATIVE	WITH TUMOR	Normal	NO	T3a	NO	Low	CZ	G3	Stage IV	KIDNEY
2	4858	K485801A	K485801A.htseq.txt	tumor	0	No	0	0				FALSE	TCGA-CZ-4858	39	null	-14343	NA	1960	0	1943	1943	M0	0	NA	MALE	Normal	Kidney Clear Cell Renal Carcinoma	NA	8310/3	C64.9	YES	100	NA	Left	NX	NO	0	NA	PREOPERATIVE	WITH TUMOR	Normal	NO	T2	NO	Normal	CZ	G4	Stage II	KIDNEY
1	4859	K485901A	K485901A.htseq.txt	tumor	0	No	0	0				FALSE	TCGA-CZ-4859	59	null	-21841	NA	1944	0	1787	1787	M0	NA	NA	FEMALE	Normal	Kidney Clear Cell Renal Carcinoma	NA	8310/3	C64.9	YES	NA	NA	Right	N0	NO	0	NA	PREOPERATIVE	TUMOR FREE	Normal	NO	T1	NO	Low	CZ	G2	Stage I	KIDNEY
2	4860	K486001A	K486001A.htseq.txt	tumor	0	No	0	0				FALSE	TCGA-CZ-4860	60	null	-22115	205	1909	0	205	194	M1	0	NA	MALE	Low	Kidney Clear Cell Renal Carcinoma	NA	8310/3	C64.9	YES	100	NA	Right	NX	NO	0	NA	PREOPERATIVE	WITH TUMOR	Normal	NO	T4	NO	Low	CZ	G4	Stage IV	KIDNEY
3	4861	K486101A	K486101A.htseq.txt	tumor	1	Yes	1	0	3	SFMBT1_ABHD5	No	FALSE	TCGA-CZ-4861	63	null	-23053	445	1875	0	445	166	M0	0	NA	MALE	Normal	Kidney Clear Cell Renal Carcinoma	NA	8310/3	C64.9	YES	100	NA	Left	NX	NO	0	NA	PREOPERATIVE	WITH TUMOR	Normal	YES	T2	NO	Normal	CZ	G2	Stage II	KIDNEY
3	4862	K486201A	K486201A.htseq.txt	tumor	0	No	0	0				FALSE	TCGA-CZ-4862	46	null	-17077	NA	1843	0	1843	1843	M0	0	NA	MALE	Normal	Kidney Clear Cell Renal Carcinoma	NA	8310/3	C64.9	YES	100	NA	Left	NX	NO	0	NA	PREOPERATIVE	TUMOR FREE	Normal	NO	T1b	YES	Low	CZ	G2	Stage I	KIDNEY
1	4863	K486301A	K486301A.htseq.txt	tumor	1	Yes	1	0	1	LRRC41_FAM159A	No	FALSE	TCGA-CZ-4863	51	null	-18730	NA	1799	0	1690	1690	M0	0	NA	FEMALE	Low	Kidney Clear Cell Renal Carcinoma	NA	8310/3	C64.9	YES	NA	NA	Left	N0	YES	NA	0	PREOPERATIVE	TUMOR FREE	Normal	NO	T3b	NO	Low	CZ	G3	Stage III	KIDNEY
3	4865	K486501A	K486501A.htseq.txt	tumor	0	No	0	0				FALSE	TCGA-CZ-4865	70	null	-25709	165	1795	0	165	153	M0	NA	NA	FEMALE	Normal	Kidney Clear Cell Renal Carcinoma	NA	8310/3	C64.9	YES	NA	NA	Left	NX	NO	0	NA	PREOPERATIVE	TUMOR FREE	Normal	YES	T1a	YES	Normal	CZ	G2	Stage I	KIDNEY
3	4866	K486601A	K486601A.htseq.txt	tumor	0	No	0	0				FALSE	TCGA-CZ-4866	79	null	-28878	NA	1782	0	1768	1768	M0	0	NA	FEMALE	Normal	Kidney Clear Cell Renal Carcinoma	NA	8310/3	C64.9	YES	NA	NA	Right	NX	NO	0	NA	PREOPERATIVE	TUMOR FREE	Normal	NO	T1	NO	Normal	CZ	G3	Stage I	KIDNEY
2	4868	K486801A	K486801A.htseq.txt	tumor	0	No	0	0				FALSE	TCGA-CJ-4868	42	null	-15601	645	2208	0	645	533	M1	0	NA	MALE	NA	Kidney Clear Cell Renal Carcinoma	NA	8310/3	C64.9	YES	NA	NA	Left	N0	YES	NA	0	PREOPERATIVE	WITH TUMOR	NA	NO	T3a	NO	NA	CJ	G3	Stage IV	KIDNEY
3	4869	K486901A	K486901A.htseq.txt	tumor	0	No	0	0				FALSE	TCGA-CJ-4869	49	null	-17923	NA	2589	0	2554	2554	M0	0	NA	MALE	Normal	Kidney Clear Cell Renal Carcinoma	NA	8310/3	C64.9	YES	NA	NA	Right	N1	YES	NA	3	NA	WITH TUMOR	Normal	NO	T2	NO	NA	CJ	G2	Stage III	KIDNEY
3	4871	K487101A	K487101A.htseq.txt	tumor	0	No	0	0				FALSE	TCGA-CJ-4871	63	null	-23195	NA	2502	0	2422	2422	M1	0	NA	MALE	Low	Kidney Clear Cell Renal Carcinoma	NA	8310/3	C64.9	YES	NA	Normal	Left	NX	NO	0	NA	NA	TUMOR FREE	Elevated	NO	T3a	NO	Normal	CJ	G4	Stage IV	KIDNEY
2	4872	K487201A	K487201A.htseq.txt	tumor	0	No	0	0				FALSE	TCGA-CJ-4872	51	null	-18862	NA	2493	0	1435	1435	M0	0	NA	MALE	Normal	Kidney Clear Cell Renal Carcinoma	NA	8310/3	C64.9	YES	NA	Normal	Right	N0	YES	NA	0	PREOPERATIVE	TUMOR FREE	Normal	NO	T1b	NO	Normal	CJ	G4	Stage I	KIDNEY
2	4873	K487301A	K487301A.htseq.txt	tumor	0	No	0	0				FALSE	TCGA-CJ-4873	85	null	-31096	NA	2492	0	2258	2258	M0	0	NA	FEMALE	Normal	Kidney Clear Cell Renal Carcinoma	NA	8310/3	C64.9	YES	NA	Normal	Right	N0	YES	NA	0	PREOPERATIVE	TUMOR FREE	Normal	NO	T3a	NO	NA	CJ	G3	Stage III	KIDNEY
1	4874	K487401A	K487401A.htseq.txt	tumor	0	No	0	0				FALSE	TCGA-CJ-4874	73	null	-26760	NA	2480	0	2283	2283	M0	0	NA	FEMALE	Normal	Kidney Clear Cell Renal Carcinoma	NA	8310/3	C64.9	YES	NA	NA	Left	N0	NO	0	NA	PREOPERATIVE	TUMOR FREE	Normal	NO	T1b	NO	NA	CJ	G3	Stage I	KIDNEY
1	4875	K487501A	K487501A.htseq.txt	tumor	0	No	0	0				FALSE	TCGA-CJ-4875	67	null	-24510	NA	2368	0	2353	2353	M1	0	NA	MALE	Low	Kidney Clear Cell Renal Carcinoma	NA	8310/3	C64.9	YES	NA	NA	Right	NX	NO	0	NA	NA	WITH TUMOR	Normal	NO	T3a	NO	NA	CJ	G3	Stage IV	KIDNEY
1	4876	K487601A	K487601A.htseq.txt	tumor	0	No	0	0				FALSE	TCGA-CJ-4876	57	null	-20992	NA	2321	0	1955	1955	M0	0	NA	MALE	Low	Kidney Clear Cell Renal Carcinoma	NA	8310/3	C64.9	YES	NA	Normal	Left	N0	NO	0	NA	PREOPERATIVE	TUMOR FREE	Low	NO	T2b	NO	NA	CJ	G3	Stage II	KIDNEY
2	4881	K488101A	K488101A.htseq.txt	tumor	0	No	0	0				FALSE	TCGA-CJ-4881	41	null	-15197	NA	2226	0	2013	2013	M0	0	NA	MALE	Normal	Kidney Clear Cell Renal Carcinoma	NA	8310/3	C64.9	YES	NA	Normal	Right	NX	NO	0	NA	NA	WITH TUMOR	Normal	NO	T3a	NO	NA	CJ	G3	Stage III	KIDNEY
2	4882	K488201A	K488201A.htseq.txt	tumor	0	No	0	0				FALSE	TCGA-CJ-4882	57	null	-21074	NA	2221	0	1883	1883	M0	0	NA	MALE	Low	Kidney Clear Cell Renal Carcinoma	NA	8310/3	C64.9	YES	NA	Normal	Right	NX	YES	NA	1	NA	TUMOR FREE	Normal	NO	T1b	NO	NA	CJ	G3	Stage I	KIDNEY
1	4884	K488401A	K488401A.htseq.txt	tumor	0	No	0	0				FALSE	TCGA-CJ-4884	72	null	-26475	NA	2200	0	993	993	M0	0	NA	FEMALE	Normal	Kidney Clear Cell Renal Carcinoma	NA	8310/3	C64.9	YES	NA	NA	Right	NX	NO	0	NA	PREOPERATIVE	TUMOR FREE	Normal	NO	T3a	NO	NA	CJ	G3	Stage III	KIDNEY
3	4885	K488501A	K488501A.htseq.txt	tumor	0	No	0	0				FALSE	TCGA-CJ-4885	64	null	-23437	NA	2163	0	2125	2125	M1	0	NA	MALE	Low	Kidney Clear Cell Renal Carcinoma	NA	8310/3	C64.9	YES	NA	Normal	Right	NX	NO	0	NA	PREOPERATIVE	WITH TUMOR	Normal	NO	T3a	NO	NA	CJ	G3	Stage IV	KIDNEY
1	4886	K488601A	K488601A.htseq.txt	tumor	0	No	0	0				FALSE	TCGA-CJ-4886	42	null	-15698	NA	2166	0	1951	1951	M0	0	NA	FEMALE	Normal	Kidney Clear Cell Renal Carcinoma	NA	8310/3	C64.9	YES	NA	Normal	Left	NX	NO	0	NA	PREOPERATIVE	TUMOR FREE	Normal	NO	T1a	NO	Normal	CJ	G3	Stage I	KIDNEY
1	4887	K488701A	K488701A.htseq.txt	tumor	0	No	0	0				FALSE	TCGA-CJ-4887	48	null	-17611	931	2161	0	649	649	M1	0	NA	MALE	Normal	Kidney Clear Cell Renal Carcinoma	NA	8310/3	C64.9	YES	NA	Normal	Right	NX	NO	0	NA	NA	WITH TUMOR	Normal	NO	T3a	NO	Normal	CJ	G3	Stage IV	KIDNEY
2	4888	K488801A	K488801A.htseq.txt	tumor	0	No	0	0				FALSE	TCGA-CJ-4888	59	null	-21701	1566	2154	0	1566	1552	M1	0	NA	MALE	Low	Kidney Clear Cell Renal Carcinoma	NA	8310/3	C64.9	YES	NA	NA	Left	NX	NO	0	NA	NA	WITH TUMOR	Normal	NO	T3a	NO	NA	CJ	G4	Stage IV	KIDNEY
3	4889	K488901A	K488901A.htseq.txt	tumor	0	No	0	0				FALSE	TCGA-CJ-4889	63	null	-23051	NA	2154	0	1945	1945	M0	0	NA	FEMALE	Normal	Kidney Clear Cell Renal Carcinoma	NA	8310/3	C64.9	YES	NA	NA	Left	NX	YES	NA	0	PREOPERATIVE	TUMOR FREE	Normal	NO	T1a	NO	NA	CJ	G4	Stage I	KIDNEY
2	4890	K489001A	K489001A.htseq.txt	tumor	0	No	0	0				FALSE	TCGA-CJ-4890	72	null	-26604	NA	2152	0	2085	2085	M1	0	NA	MALE	Low	Kidney Clear Cell Renal Carcinoma	NA	8310/3	C64.9	YES	NA	Elevated	Left	N0	YES	NA	0	NA	WITH TUMOR	Normal	NO	T3a	NO	NA	CJ	G4	Stage IV	KIDNEY
2	4891	K489101A	K489101A.htseq.txt	tumor	0	No	0	0				FALSE	TCGA-CJ-4891	57	null	-21059	818	2135	0	818	773	M0	0	NA	FEMALE	Low	Kidney Clear Cell Renal Carcinoma	NA	8310/3	C64.9	YES	NA	Normal	Left	N0	YES	NA	0	NA	TUMOR FREE	Elevated	NO	T3c	YES	NA	CJ	G4	Stage III	KIDNEY
1	4892	K489201A	K489201A.htseq.txt	tumor	0	No	0	0				FALSE	TCGA-CJ-4892	65	null	-23764	NA	2133	0	1520	1520	M0	0	NA	FEMALE	Normal	Kidney Clear Cell Renal Carcinoma	NA	8310/3	C64.9	YES	NA	Normal	Right	N0	YES	NA	0	PREOPERATIVE	TUMOR FREE	Normal	NO	T1b	NO	NA	CJ	G2	Stage I	KIDNEY
1	4893	K489301A	K489301A.htseq.txt	tumor	0	No	0	0				FALSE	TCGA-CJ-4893	76	null	-27885	NA	2132	0	749	749	M0	0	NA	FEMALE	Normal	Kidney Clear Cell Renal Carcinoma	NA	8310/3	C64.9	YES	NA	Normal	Right	NX	NO	NA	NA	PREOPERATIVE	TUMOR FREE	Normal	NO	T1b	NO	NA	CJ	G3	Stage I	KIDNEY
1	4894	K489401A	K489401A.htseq.txt	tumor	1	Yes	1	0	17	ZZEF1_ANKFY1	No	FALSE	TCGA-CJ-4894	58	null	-21524	841	2051	0	841	822	M0	0	NA	MALE	Low	Kidney Clear Cell Renal Carcinoma	NA	8310/3	C64.9	YES	NA	NA	Right	N0	YES	NA	0	NA	WITH TUMOR	Normal	NO	T3a	YES	NA	CJ	G3	Stage III	KIDNEY
2	4895	K489501A	K489501A.htseq.txt	tumor	0	No	0	0				FALSE	TCGA-CJ-4895	62	null	-22892	1200	2104	0	1200	1145	M1	0	NA	MALE	Low	Kidney Clear Cell Renal Carcinoma	NA	8310/3	C64.9	YES	NA	Normal	Left	NX	NO	NA	NA	NA	WITH TUMOR	Elevated	NO	T3a	NO	Normal	CJ	G4	Stage IV	KIDNEY
1	4897	K489701A	K489701A.htseq.txt	tumor	0	No	0	0				FALSE	TCGA-CJ-4897	79	null	-29123	NA	1935	0	1808	1808	M0	0	NA	FEMALE	Normal	Kidney Clear Cell Renal Carcinoma	NA	8310/3	C64.9	YES	NA	NA	Right	NX	NO	NA	NA	PREOPERATIVE	WITH TUMOR	Normal	NO	T3a	NO	NA	CJ	G3	Stage III	KIDNEY
3	4899	K489901A	K489901A.htseq.txt	tumor	0	No	0	0				FALSE	TCGA-CJ-4899	42	null	-15637	NA	1827	0	1527	1527	M0	0	NA	MALE	Normal	Kidney Clear Cell Renal Carcinoma	NA	8310/3	C64.9	YES	NA	NA	Left	NX	NO	NA	NA	NA	TUMOR FREE	Normal	NO	T1b	NO	NA	CJ	G2	Stage I	KIDNEY
2	4900	K490001A	K490001A.htseq.txt	tumor	0	No	0	0				FALSE	TCGA-CJ-4900	69	null	-25508	1713	1818	0	1274	1274	M1	0	NA	FEMALE	Low	Kidney Clear Cell Renal Carcinoma	NA	8310/3	C64.9	YES	NA	Normal	Left	N1	YES	NA	1	NA	WITH TUMOR	Elevated	YES	T4	NO	Elevated	CJ	G4	Stage IV	KIDNEY
2	4901	K490101A	K490101A.htseq.txt	tumor	1	Yes	0	1	17:19:00	TICAM1_VMP1	No	FALSE	TCGA-CJ-4901	47	null	-17396	NA	1823	0	1450	1450	M0	0	NA	MALE	Low	Kidney Clear Cell Renal Carcinoma	NA	8310/3	C64.9	YES	NA	Normal	Right	NX	NO	NA	NA	PREOPERATIVE	TUMOR FREE	Normal	NO	T3b	NO	NA	CJ	G3	Stage III	KIDNEY
3	4902	K490201A	K490201A.htseq.txt	tumor	0	No	0	0				FALSE	TCGA-CJ-4902	61	null	-22424	NA	1822	0	1519	1519	M0	0	NA	MALE	Normal	Kidney Clear Cell Renal Carcinoma	NA	8310/3	C64.9	YES	NA	Normal	Right	NX	NO	NA	NA	PREOPERATIVE	TUMOR FREE	Normal	NO	T3a	NO	NA	CJ	G3	Stage III	KIDNEY
1	4903	K490301A	K490301A.htseq.txt	tumor	0	No	0	0				FALSE	TCGA-CJ-4903	50	null	-18510	NA	1819	0	1559	1558	M0	0	NA	MALE	Normal	Kidney Clear Cell Renal Carcinoma	NA	8310/3	C64.9	YES	NA	Normal	Left	NX	NO	NA	NA	PREOPERATIVE	TUMOR FREE	Normal	NO	T1b	NO	Normal	CJ	G3	Stage I	KIDNEY
1	4904	K490401A	K490401A.htseq.txt	tumor	0	No	0	0				FALSE	TCGA-CJ-4904	60	null	-22036	NA	1814	0	1792	1792	M1	0	NA	FEMALE	Normal	Kidney Clear Cell Renal Carcinoma	NA	8310/3	C64.9	YES	NA	Normal	Left	N1	YES	NA	0	NA	WITH TUMOR	Normal	NO	T3a	YES	Normal	CJ	G3	Stage IV	KIDNEY
1	4905	K490501A	K490501A.htseq.txt	tumor	1	Yes	0	1	03:07:00	MIR548A2_CFTR	No	FALSE	TCGA-CJ-4905	62	null	-22864	NA	1812	0	1495	1495	M0	0	NA	FEMALE	Normal	Kidney Clear Cell Renal Carcinoma	NA	8310/3	C64.9	YES	NA	NA	Right	NX	NO	NA	NA	NA	TUMOR FREE	Normal	NO	T1a	NO	NA	CJ	G2	Stage I	KIDNEY
1	4907	K490701A	K490701A.htseq.txt	tumor	0	No	0	0				FALSE	TCGA-CJ-4907	58	null	-21208	NA	1808	0	1498	1498	M0	0	NA	MALE	Low	Kidney Clear Cell Renal Carcinoma	NA	8310/3	C64.9	YES	NA	Normal	Right	NX	NO	NA	NA	PREOPERATIVE	TUMOR FREE	Normal	NO	T3b	NO	Normal	CJ	G3	Stage III	KIDNEY
3	4908	K490801A	K490801A.htseq.txt	tumor	0	No	0	0				FALSE	TCGA-CJ-4908	38	null	-14226	NA	1801	0	1530	1530	M0	0	NA	MALE	Normal	Kidney Clear Cell Renal Carcinoma	NA	8310/3	C64.9	YES	NA	Normal	Right	NX	NO	NA	NA	PREOPERATIVE	TUMOR FREE	Normal	NO	T1a	NO	Normal	CJ	G2	Stage I	KIDNEY
3	4912	K491201A	K491201A.htseq.txt	tumor	0	No	0	0				FALSE	TCGA-CJ-4912	61	null	-22623	NA	1784	0	1656	1656	M0	0	NA	MALE	NA	Kidney Clear Cell Renal Carcinoma	NA	8310/3	C64.9	YES	NA	NA	Left	NX	NO	NA	NA	PREOPERATIVE	TUMOR FREE	NA	NO	T2	NO	NA	CJ	G3	Stage II	KIDNEY
1	4916	K491601A	K491601A.htseq.txt	tumor	0	No	0	0				FALSE	TCGA-CJ-4916	69	null	-25470	NA	1477	0	1372	1372	M0	0	NA	FEMALE	NA	Kidney Clear Cell Renal Carcinoma	NA	8310/3	C64.9	YES	NA	NA	Right	NX	NO	NA	NA	PREOPERATIVE	TUMOR FREE	NA	NO	T3a	NO	NA	CJ	G3	Stage III	KIDNEY
2	4918	K491801A	K491801A.htseq.txt	tumor	0	No	0	0				FALSE	TCGA-CJ-4918	64	null	-23379	92	2224	0	92	45	M1	0	NA	MALE	Normal	Kidney Clear Cell Renal Carcinoma	NA	8310/3	C64.9	YES	NA	Normal	Left	N0	YES	NA	0	NA	WITH TUMOR	Normal	NO	T3a	NO	Elevated	CJ	G4	Stage IV	KIDNEY
2	4920	K492001A	K492001A.htseq.txt	tumor	1	Yes	0	1	10:17:00	HNF1B_ANAPC16	No	FALSE	TCGA-CJ-4920	64	null	-23656	139	2486	0	139	54	M0	0	NA	FEMALE	Normal	Kidney Clear Cell Renal Carcinoma	NA	8310/3	C64.9	YES	NA	Normal	Left	NX	NO	NA	NA	PREOPERATIVE	TUMOR FREE	Normal	NO	T1b	NO	Normal	CJ	G2	Stage I	KIDNEY
2	4923	K492301A	K492301A.htseq.txt	tumor	3	Yes	3	0	16,17,2	CNOT1_PHKB,WIPF2_RAPGEFL1,TRIP12_SLC16A14	No	FALSE	TCGA-CJ-4923	63	null	-23352	572	2304	0	572	572	M1	0	NA	FEMALE	Normal	Kidney Clear Cell Renal Carcinoma	NA	8310/3	C64.9	YES	NA	Normal	Left	NX	NO	NA	NA	PREOPERATIVE	WITH TUMOR	Normal	NO	T3a	NO	NA	CJ	G4	Stage IV	KIDNEY
1	4945	K494501A	K494501A.htseq.txt	tumor	1	Yes	0	1	17:19:00	ELL_CISD3	yes	FALSE	TCGA-B0-4945	75	null	-27481	2187	2972	0	2187	269	M0	NA	NA	FEMALE	Elevated	Kidney Clear Cell Renal Carcinoma	NA	8310/3	C64.9	YES	NA	NA	Right	N0	NO	0	0	NA	TUMOR FREE	Elevated	NO	T1	NO	Normal	B0	G2	Stage I	KIDNEY
3	4959	K495901A	K495901A.htseq.txt	tumor	0	No	0	0				FALSE	TCGA-BP-4959	49	null	-17968	NA	2736	0	2660	2660	M0	NA	NA	MALE	Low	Kidney Clear Cell Renal Carcinoma	NA	8310/3	C64.9	YES	NA	NA	Right	NX	NO	NA	NA	NA	TUMOR FREE	Normal	NO	T1b	NO	Low	BP	G3	Stage I	KIDNEY
3	4960	K496001A	K496001A.htseq.txt	tumor	0	No	0	0				FALSE	TCGA-BP-4960	46	null	-17099	NA	2205	0	2172	2172	M0	NA	NA	MALE	Low	Kidney Clear Cell Renal Carcinoma	NA	8310/3	C64.9	YES	NA	NA	Left	N0	YES	NA	0	NA	TUMOR FREE	Normal	NO	T2	NO	Low	BP	G3	Stage II	KIDNEY
1	4961	K496101A	K496101A.htseq.txt	tumor	1	Yes	0	1	03:05:00	ACOX2_LOC728723	No	FALSE	TCGA-BP-4961	47	null	-17283	NA	2038	0	1935	1935	M0	NA	NA	MALE	Low	Kidney Clear Cell Renal Carcinoma	NA	8310/3	C64.9	YES	NA	NA	Right	NX	NO	NA	NA	NA	TUMOR FREE	Normal	NO	T1a	NO	Low	BP	G2	Stage I	KIDNEY
3	4962	K496201A	K496201A.htseq.txt	tumor	0	No	0	0				FALSE	TCGA-BP-4962	58	null	-21255	NA	1969	0	1785	1785	M0	NA	NA	MALE	Low	Kidney Clear Cell Renal Carcinoma	NA	8310/3	C64.9	YES	NA	NA	Left	NX	NO	NA	NA	NA	TUMOR FREE	Normal	NO	T2	NO	Low	BP	G2	Stage II	KIDNEY
1	4963	K496301A	K496301A.htseq.txt	tumor	0	No	0	0				FALSE	TCGA-BP-4963	63	null	-23373	NA	1953	0	1834	1834	M0	NA	NA	MALE	Low	Kidney Clear Cell Renal Carcinoma	NA	8310/3	C64.9	YES	NA	NA	Left	NX	NO	NA	NA	NA	TUMOR FREE	Normal	NO	T1b	NO	Low	BP	G3	Stage I	KIDNEY
3	4964	K496401A	K496401A.htseq.txt	tumor	0	No	0	0				FALSE	TCGA-BP-4964	54	null	-20084	NA	1954	0	1862	1862	M0	NA	NA	FEMALE	Low	Kidney Clear Cell Renal Carcinoma	NA	8310/3	C64.9	YES	NA	NA	Right	N0	YES	NA	0	NA	TUMOR FREE	Normal	NO	T1a	NO	Low	BP	G2	Stage I	KIDNEY
1	4965	K496501A	K496501A.htseq.txt	tumor	1	Yes	1	0	5	TNIP1_ARSI	No	FALSE	TCGA-BP-4965	46	null	-16991	NA	1932	0	1871	1871	M0	NA	NA	MALE	Normal	Kidney Clear Cell Renal Carcinoma	NA	8310/3	C64.9	YES	NA	NA	Left	NX	NO	NA	NA	NA	TUMOR FREE	Normal	YES	T1a	YES	Normal	BP	G2	Stage I	KIDNEY
3	4967	K496701A	K496701A.htseq.txt	tumor	0	No	0	0				FALSE	TCGA-BP-4967	76	null	-27857	NA	1851	0	204	204	M0	NA	NA	MALE	Low	Kidney Clear Cell Renal Carcinoma	NA	8310/3	C64.9	YES	NA	NA	Right	N0	YES	NA	0	NA	TUMOR FREE	Normal	NO	T3a	NO	Low	BP	G2	Stage III	KIDNEY
3	4968	K496801A	K496801A.htseq.txt	tumor	1	Yes	0	1	03:05:00	MCC_PSMD6	No	FALSE	TCGA-BP-4968	40	null	-14651	NA	1830	0	1745	1792	M0	NA	NA	MALE	Low	Kidney Clear Cell Renal Carcinoma	NA	8310/3	C64.9	YES	NA	NA	Right	N0	YES	NA	0	NA	TUMOR FREE	Normal	NO	T1b	NO	Low	BP	G3	Stage I	KIDNEY
1	4969	K496901A	K496901A.htseq.txt	tumor	0	No	0	0				FALSE	TCGA-BP-4969	63	null	-23216	NA	1829	0	1794	1794	M0	NA	NA	FEMALE	Normal	Kidney Clear Cell Renal Carcinoma	NA	8310/3	C64.9	YES	NA	NA	Right	NX	NO	NA	NA	NA	TUMOR FREE	Normal	NO	T1a	NO	Low	BP	G2	Stage I	KIDNEY
3	4970	K497001A	K497001A.htseq.txt	tumor	0	No	0	0				FALSE	TCGA-BP-4970	44	null	-16228	NA	1811	0	432	432	M0	NA	NA	MALE	Normal	Kidney Clear Cell Renal Carcinoma	NA	8310/3	C64.9	YES	NA	NA	Right	N0	YES	NA	0	NA	TUMOR FREE	Low	NO	T1a	NO	Low	BP	G3	Stage I	KIDNEY
3	4971	K497101A	K497101A.htseq.txt	tumor	1	Yes	0	1	12:05:00	SLC12A7_HDAC7	No	FALSE	TCGA-BP-4971	40	null	-14686	NA	1790	0	1476	1476	M0	NA	NA	MALE	Low	Kidney Clear Cell Renal Carcinoma	NA	8310/3	C64.9	YES	NA	NA	Right	N0	YES	NA	0	NA	TUMOR FREE	Low	NO	T3a	NO	Low	BP	G3	Stage III	KIDNEY
3	4972	K497201A	K497201A.htseq.txt	tumor	0	No	0	0				FALSE	TCGA-BP-4972	43	null	-16038	NA	1766	0	1501	1506	M0	NA	NA	FEMALE	Normal	Kidney Clear Cell Renal Carcinoma	NA	8310/3	C64.9	YES	NA	NA	Left	NX	NO	NA	NA	NA	TUMOR FREE	Normal	NO	T3a	NO	Low	BP	G3	Stage III	KIDNEY
1	4973	K497301A	K497301A.htseq.txt	tumor	0	No	0	0				FALSE	TCGA-BP-4973	47	null	-17461	NA	1756	0	1384	1742	M0	NA	NA	MALE	Normal	Kidney Clear Cell Renal Carcinoma	NA	8310/3	C64.9	YES	NA	NA	Right	NX	NO	NA	NA	NA	TUMOR FREE	Normal	NO	T3a	NO	Low	BP	G3	Stage III	KIDNEY
1	4974	K497401A	K497401A.htseq.txt	tumor	0	No	0	0				FALSE	TCGA-BP-4974	58	null	-21303	226	1713	0	226	216	M1	NA	NA	MALE	Low	Kidney Clear Cell Renal Carcinoma	NA	8310/3	C64.9	YES	NA	NA	Right	N0	YES	NA	0	NA	WITH TUMOR	Normal	NO	T3a	NO	Low	BP	G4	Stage IV	KIDNEY
1	4975	K497501A	K497501A.htseq.txt	tumor	0	No	0	0				FALSE	TCGA-BP-4975	40	null	-14709	NA	1687	0	1433	1433	M0	NA	NA	MALE	Normal	Kidney Clear Cell Renal Carcinoma	NA	8310/3	C64.9	YES	NA	NA	Right	NX	NO	NA	NA	NA	TUMOR FREE	Normal	NO	T1b	NO	Low	BP	G3	Stage I	KIDNEY
1	4976	K497601A	K497601A.htseq.txt	tumor	0	No	0	0				FALSE	TCGA-BP-4976	77	null	-28379	NA	1668	0	1632	1656	M0	NA	NA	MALE	Low	Kidney Clear Cell Renal Carcinoma	NA	8310/3	C64.9	YES	NA	NA	Right	NX	NO	NA	NA	NA	TUMOR FREE	Normal	NO	T1a	YES	Low	BP	G3	Stage I	KIDNEY
3	4977	K497701A	K497701A.htseq.txt	tumor	1	Yes	1	0	2	TRIP12_SLC16A14	No	FALSE	TCGA-BP-4977	57	null	-20949	NA	1653	0	454	455	M0	NA	NA	MALE	Normal	Kidney Clear Cell Renal Carcinoma	NA	8310/3	C64.9	YES	NA	NA	Left	NX	NO	NA	NA	NA	TUMOR FREE	Normal	NO	T1b	NO	Normal	BP	G3	Stage I	KIDNEY
1	4981	K498101A	K498101A.htseq.txt	tumor	0	No	0	0				FALSE	TCGA-BP-4981	75	null	-27675	1097	1841	0	1097	84	M0	NA	NA	FEMALE	Normal	Kidney Clear Cell Renal Carcinoma	NA	8310/3	C64.9	YES	NA	NA	Right	NX	NO	NA	NA	NA	TUMOR FREE	Low	NO	T3a	NO	Low	BP	G3	Stage III	KIDNEY
1	4982	K498201A	K498201A.htseq.txt	tumor	0	No	0	0				FALSE	TCGA-BP-4982	42	null	-15451	NA	1512	0	1013	1013	M0	NA	NA	MALE	Low	Kidney Clear Cell Renal Carcinoma	NA	8310/3	C64.9	YES	NA	NA	Left	NX	NO	NA	NA	NA	TUMOR FREE	Normal	NO	T1b	NO	Low	BP	G3	Stage I	KIDNEY
2	4983	K498301A	K498301A.htseq.txt	tumor	6	Yes	6	0	9,9,17,9,17,17	DOCK8_JAK2,CD274_KANK1,UNK_PRKCA,GLIS3_RCL1,ENDOV_TMEM104,MGAT5B_VMP1	Yes	FALSE	TCGA-BP-4983	67	null	-24558	NA	1469	0	1412	1412	M0	NA	NA	FEMALE	Low	Kidney Clear Cell Renal Carcinoma	NA	8310/3	C64.9	YES	NA	NA	Right	NX	NO	NA	NA	NA	TUMOR FREE	Normal	NO	T3a	NO	Low	BP	G4	Stage III	KIDNEY
2	4985	K498501A	K498501A.htseq.txt	tumor	0	No	0	0				FALSE	TCGA-BP-4985	72	null	-26611	951	1468	0	951	944	M0	NA	NA	MALE	Normal	Kidney Clear Cell Renal Carcinoma	NA	8310/3	C64.9	YES	NA	NA	Left	N0	YES	NA	0	NA	WITH TUMOR	Normal	NO	T3a	NO	Low	BP	G4	Stage III	KIDNEY
2	4986	K498601A	K498601A.htseq.txt	tumor	1	Yes	1	0	5	LMAN2_SPOCK1	No	FALSE	TCGA-BP-4986	75	null	-27612	NA	1504	0	785	785	M0	NA	NA	MALE	Low	Kidney Clear Cell Renal Carcinoma	NA	8310/3	C64.9	YES	NA	NA	Right	N0	YES	NA	0	NA	TUMOR FREE	Normal	YES	T1a	YES	Low	BP	G3	Stage I	KIDNEY
1	4987	K498701A	K498701A.htseq.txt	tumor	0	No	0	0				FALSE	TCGA-BP-4987	41	null	-15041	NA	1449	0	1124	1205	M0	NA	NA	FEMALE	Low	Kidney Clear Cell Renal Carcinoma	NA	8310/3	C64.9	YES	NA	NA	Left	NX	NO	NA	NA	NA	TUMOR FREE	Normal	NO	T1b	NO	Low	BP	G2	Stage I	KIDNEY
3	4988	K498801A	K498801A.htseq.txt	tumor	0	No	0	0				FALSE	TCGA-BP-4988	72	null	-26576	827	1432	0	827	822	M0	NA	NA	MALE	Low	Kidney Clear Cell Renal Carcinoma	NA	8310/3	C64.9	YES	NA	NA	Right	N0	YES	NA	0	NA	TUMOR FREE	Low	NO	T1a	YES	Low	BP	G2	Stage I	KIDNEY
3	4989	K498901A	K498901A.htseq.txt	tumor	0	No	0	0				FALSE	TCGA-BP-4989	58	null	-21382	NA	1426	0	117	117	M0	NA	NA	MALE	Low	Kidney Clear Cell Renal Carcinoma	NA	8310/3	C64.9	YES	NA	NA	Right	N0	YES	NA	0	NA	TUMOR FREE	Normal	NO	T3a	NO	Low	BP	G3	Stage III	KIDNEY
3	4991	K499101A	K499101A.htseq.txt	tumor	0	No	0	0				FALSE	TCGA-BP-4991	54	null	-19739	NA	1406	0	1044	1378	M0	NA	NA	MALE	Low	Kidney Clear Cell Renal Carcinoma	NA	8310/3	C64.9	YES	NA	NA	Right	NX	NO	NA	NA	NA	TUMOR FREE	Normal	NO	T1a	NO	Low	BP	G2	Stage I	KIDNEY
3	4992	K499201A	K499201A.htseq.txt	tumor	0	No	0	0				FALSE	TCGA-BP-4992	66	null	-24438	NA	1397	0	500	500	M0	NA	NA	MALE	Low	Kidney Clear Cell Renal Carcinoma	NA	8310/3	C64.9	YES	NA	NA	Left	NX	NO	NA	NA	NA	TUMOR FREE	Normal	NO	T1b	NO	Low	BP	G4	Stage I	KIDNEY
1	4993	K499301A	K499301A.htseq.txt	tumor	0	No	0	0				FALSE	TCGA-BP-4993	58	null	-21407	NA	1430	0	176	176	M0	NA	NA	MALE	Low	Kidney Clear Cell Renal Carcinoma	NA	8310/3	C64.9	YES	NA	NA	Left	NX	NO	NA	NA	NA	TUMOR FREE	Normal	NO	T1a	YES	Low	BP	G3	Stage I	KIDNEY
3	4994	K499401A	K499401A.htseq.txt	tumor	0	No	0	0				FALSE	TCGA-BP-4994	54	null	-19946	NA	1391	0	1307	1307	M0	NA	NA	MALE	Low	Kidney Clear Cell Renal Carcinoma	NA	8310/3	C64.9	YES	NA	NA	Left	NX	NO	NA	NA	NA	TUMOR FREE	Normal	NO	T1a	NO	Low	BP	G3	Stage I	KIDNEY
3	4995	K499501A	K499501A.htseq.txt	tumor	0	No	0	0				FALSE	TCGA-BP-4995	68	null	-24850	NA	1420	0	1371	1371	M0	NA	NA	MALE	Low	Kidney Clear Cell Renal Carcinoma	NA	8310/3	C64.9	YES	NA	NA	Right	N0	YES	NA	0	NA	TUMOR FREE	Normal	NO	T1b	YES	Low	BP	G3	Stage I	KIDNEY
3	4998	K499801A	K499801A.htseq.txt	tumor	0	No	0	0				FALSE	TCGA-BP-4998	49	null	-17997	NA	1383	0	931	931	M0	NA	NA	MALE	Low	Kidney Clear Cell Renal Carcinoma	NA	8310/3	C64.9	YES	NA	NA	Right	NX	NO	NA	NA	NA	TUMOR FREE	Normal	NO	T1a	NO	Low	BP	G3	Stage I	KIDNEY
1	4999	K499901A	K499901A.htseq.txt	tumor	0	No	0	0				FALSE	TCGA-BP-4999	56	null	-20517	NA	1392	0	1266	1266	M0	NA	NA	MALE	Normal	Kidney Clear Cell Renal Carcinoma	NA	8310/3	C64.9	YES	NA	NA	Left	NX	NO	NA	NA	NA	TUMOR FREE	Normal	NO	T1a	YES	Low	BP	G2	Stage I	KIDNEY
3	5000	K500001A	K500001A.htseq.txt	tumor	0	No	0	0				FALSE	TCGA-BP-5000	40	null	-14868	NA	1325	0	563	788	M0	NA	NA	MALE	Normal	Kidney Clear Cell Renal Carcinoma	NA	8310/3	C64.9	YES	NA	NA	Left	NX	NO	NA	NA	NA	TUMOR FREE	Normal	NO	T1b	NO	Low	BP	G3	Stage I	KIDNEY
1	5001	K500101A	K500101A.htseq.txt	tumor	0	No	0	0				FALSE	TCGA-BP-5001	43	null	-15857	NA	1329	0	1177	1177	M0	NA	NA	FEMALE	Low	Kidney Clear Cell Renal Carcinoma	NA	8310/3	C64.9	YES	NA	NA	Right	NX	NO	NA	NA	NA	TUMOR FREE	Normal	NO	T1b	NO	Low	BP	G2	Stage I	KIDNEY
1	5004	K500401A	K500401A.htseq.txt	tumor	1	Yes	1	0	5	FAM172A_ERAP2	No	FALSE	TCGA-BP-5004	53	null	-19383	NA	1237	0	1126	1126	M0	NA	NA	MALE	Low	Kidney Clear Cell Renal Carcinoma	NA	8310/3	C64.9	YES	NA	NA	Right	NX	NO	NA	NA	NA	TUMOR FREE	Normal	NO	T1a	NO	Low	BP	G3	Stage I	KIDNEY
1	5006	K500601A	K500601A.htseq.txt	tumor	0	No	0	0				FALSE	TCGA-BP-5006	61	null	-22324	NA	1173	0	840	840	M0	NA	NA	MALE	Low	Kidney Clear Cell Renal Carcinoma	NA	8310/3	C64.9	YES	NA	NA	Left	N0	YES	NA	0	NA	TUMOR FREE	Normal	NO	T1a	YES	Low	BP	G2	Stage I	KIDNEY
3	5008	K500801A	K500801A.htseq.txt	tumor	0	No	0	0				FALSE	TCGA-BP-5008	46	null	-17007	NA	1140	0	1071	1071	M0	NA	NA	MALE	Low	Kidney Clear Cell Renal Carcinoma	NA	8310/3	C64.9	YES	NA	NA	Right	NX	NO	NA	NA	NA	TUMOR FREE	Normal	NO	T1a	NO	Low	BP	G2	Stage I	KIDNEY
3	5009	K500901A	K500901A.htseq.txt	tumor	0	No	0	0				FALSE	TCGA-BP-5009	52	null	-19052	1092	1093	0	1092	1082	M0	NA	NA	MALE	Low	Kidney Clear Cell Renal Carcinoma	NA	8310/3	C64.9	YES	NA	NA	Left	NX	NO	NA	NA	NA	WITH TUMOR	Normal	NO	T1b	YES	Low	BP	G3	Stage I	KIDNEY
2	5010	K501001A	K501001A.htseq.txt	tumor	0	No	0	0				FALSE	TCGA-BP-5010	63	null	-23130	877	1128	0	877	865	M0	NA	NA	MALE	Low	Kidney Clear Cell Renal Carcinoma	NA	8310/3	C64.9	YES	NA	NA	Right	N0	YES	NA	0	NA	TUMOR FREE	Normal	NO	T3a	NO	Low	BP	G4	Stage III	KIDNEY
3	5075	K507501A	K507501A.htseq.txt	tumor	0	No	0	0				FALSE	TCGA-B0-5075	77	null	-28204	637	2100	0	608	608	M0	NA	NA	FEMALE	Normal	Kidney Clear Cell Renal Carcinoma	NA	8310/3	C64.9	YES	NA	NA	Left	N0	NO	0	0	NA	TUMOR FREE	Elevated	NO	T3a	NO	Normal	B0	G2	Stage III	KIDNEY
3	5077	K507701A	K507701A.htseq.txt	tumor	0	No	0	0				FALSE	TCGA-B0-5077	77	null	-28376	1345	2225	0	1320	1320	M0	NA	NA	MALE	Normal	Kidney Clear Cell Renal Carcinoma	NA	8310/3	C64.9	YES	NA	NA	Left	N0	NO	0	0	NA	TUMOR FREE	Normal	NO	T1a	NO	Normal	B0	G3	Stage I	KIDNEY
2	5080	K508001A	K508001A.htseq.txt	tumor	0	No	0	0				FALSE	TCGA-B0-5080	62	null	-22997	397	2223	0	277	277	M1	NA	NA	MALE	Normal	Kidney Clear Cell Renal Carcinoma	NA	8310/3	C64.9	YES	NA	NA	Right	N0	NA	NA	NA	NA	WITH TUMOR	Normal	NO	T3a	NO	Normal	B0	G3	Stage IV	KIDNEY
2	5081	K508101A	K508101A.htseq.txt	tumor	1	Yes	0	1	19:07:00	ZNF277_CEACAM19	No	FALSE	TCGA-B0-5081	79	null	-29179	402	2100	0	273	273	M0	NA	NA	FEMALE	Low	Kidney Clear Cell Renal Carcinoma	NA	8310/3	C64.9	YES	NA	NA	Right	N0	NO	0	0	NA	WITH TUMOR	Elevated	NO	T3b	NO	Normal	B0	G2	Stage III	KIDNEY
3	5083	K508301A	K508301A.htseq.txt	tumor	0	No	0	0				FALSE	TCGA-B0-5083	63	null	-23034	1035	2190	0	465	465	M0	NA	NA	MALE	Low	Kidney Clear Cell Renal Carcinoma	NA	8310/3	C64.9	YES	NA	NA	Left	N0	NO	0	0	NA	WITH TUMOR	NA	NO	T1a	NO	Low	B0	G3	Stage I	KIDNEY
2	5084	K508401A	K508401A.htseq.txt	tumor	0	No	0	0				FALSE	TCGA-B0-5084	33	null	-12219	239	1843	0	239	129	M1	NA	NA	MALE	Normal	Kidney Clear Cell Renal Carcinoma	NA	8310/3	C64.9	YES	NA	NA	Right	N1	YES	NA	1	NA	WITH TUMOR	Elevated	NO	T3a	NO	Normal	B0	G3	Stage IV	KIDNEY
1	5085	K508501A	K508501A.htseq.txt	tumor	0	No	0	0				FALSE	TCGA-B0-5085	75	null	-27724	838	2245	0	838	353	M0	NA	NA	FEMALE	Low	Kidney Clear Cell Renal Carcinoma	NA	8310/3	C64.9	YES	NA	NA	Left	N0	YES	NA	0	NA	TUMOR FREE	Normal	NO	T3a	NO	Low	B0	G3	Stage III	KIDNEY
1	5088	K508801A	K508801A.htseq.txt	tumor	0	No	0	0				FALSE	TCGA-B0-5088	53	null	-19586	654	1735	0	524	524	M0	NA	NA	MALE	Normal	Kidney Clear Cell Renal Carcinoma	NA	8310/3	C64.9	YES	NA	NA	Right	N0	NO	0	0	NA	TUMOR FREE	Normal	NO	T1b	YES	Normal	B0	G2	Stage I	KIDNEY
3	5092	K509201A	K509201A.htseq.txt	tumor	0	No	0	0				FALSE	TCGA-B0-5092	53	null	-19611	459	1064	0	459	459	M1	NA	NA	FEMALE	Normal	Kidney Clear Cell Renal Carcinoma	NA	8310/3	C64.9	YES	NA	NA	Left	N0	NO	0	0	NA	WITH TUMOR	Normal	NO	T1a	NO	Low	B0	G3	Stage IV	KIDNEY
2	5094	K509401A	K509401A.htseq.txt	tumor	0	No	0	0				FALSE	TCGA-B0-5094	62	null	-22965	333	1009	0	333	229	M1	NA	NA	MALE	Low	Kidney Clear Cell Renal Carcinoma	NA	8310/3	C64.9	YES	NA	NA	Left	N0	NO	0	0	NA	WITH TUMOR	Normal	NO	T3b	NO	Normal	B0	G2	Stage IV	KIDNEY
2	5095	K509501A	K509501A.htseq.txt	tumor	1	Yes	1	0	2	GORASP2_WIPF1	No	FALSE	TCGA-B0-5095	81	null	-29920	246	919	0	246	246	M0	NA	NA	MALE	Low	Kidney Clear Cell Renal Carcinoma	NA	8310/3	C64.9	YES	NA	NA	Right	N0	NO	0	0	NA	TUMOR FREE	Low	NO	T3a	NO	Low	B0	G3	Stage III	KIDNEY
2	5096	K509601A	K509601A.htseq.txt	tumor	0	No	0	0				FALSE	TCGA-B0-5096	72	null	-26571	70	4716	0	70	14	M0	NA	NA	FEMALE	Normal	Kidney Clear Cell Renal Carcinoma	NA	8310/3	C64.9	YES	NA	NA	Left	N1	YES	NA	1	NA	NA	Normal	NO	T3	NO	Normal	B0	G3	Stage III	KIDNEY
2	5097	K509701A	K509701A.htseq.txt	tumor	1	Yes	1	0	7	SRRT_TRIP6	No	FALSE	TCGA-B0-5097	59	null	-21821	NA	262	0	182	182	M0	NA	NA	FEMALE	Normal	Kidney Clear Cell Renal Carcinoma	NA	8310/3	C64.9	YES	NA	NA	Right	N0	YES	NA	0	NA	TUMOR FREE	Normal	NO	T3b	NO	Low	B0	G2	Stage III	KIDNEY
2	5098	K509801A	K509801A.htseq.txt	tumor	0	No	0	0				FALSE	TCGA-B0-5098	53	null	-19620	1584	4530	0	1584	1265	M0	NA	NA	FEMALE	Normal	Kidney Clear Cell Renal Carcinoma	NA	8310/3	C64.9	YES	NA	NA	Right	NX	NO	0	0	NA	WITH TUMOR	Normal	NO	T1	NO	Normal	B0	G3	Stage I	KIDNEY
1	5099	K509901A	K509901A.htseq.txt	tumor	0	No	0	0				FALSE	TCGA-B0-5099	88	null	-32299	549	3143	0	549	444	M0	NA	NA	FEMALE	Low	Kidney Clear Cell Renal Carcinoma	NA	8310/3	C64.9	YES	NA	NA	Right	NX	NO	0	0	NA	WITH TUMOR	Low	NO	T3b	NO	Low	B0	G3	Stage III	KIDNEY
3	5100	K510001A	K510001A.htseq.txt	tumor	0	No	0	0				FALSE	TCGA-B0-5100	72	null	-26464	1927	4477	0	1927	1820	M0	NA	NA	MALE	Low	Kidney Clear Cell Renal Carcinoma	NA	8310/3	C64.9	YES	NA	NA	Right	NX	NO	0	0	NA	WITH TUMOR	Normal	NO	T3	NO	NA	B0	G3	Stage III	KIDNEY
3	5102	K510201A	K510201A.htseq.txt	tumor	0	No	0	0				FALSE	TCGA-B0-5102	74	null	-27152	2763	4340	0	2763	2719	M0	NA	NA	FEMALE	Normal	Kidney Clear Cell Renal Carcinoma	NA	8310/3	C64.9	YES	NA	NA	Left	NX	NO	0	0	NA	TUMOR FREE	Normal	NO	T1	NO	NA	B0	G3	Stage I	KIDNEY
1	5104	K510401A	K510401A.htseq.txt	tumor	0	No	0	0				FALSE	TCGA-B0-5104	90	null	-32872	2751	3275	0	2751	2416	M0	NA	NA	FEMALE	Low	Kidney Clear Cell Renal Carcinoma	NA	8310/3	C64.9	YES	NA	NA	Left	N0	NO	0	0	NA	TUMOR FREE	Normal	NO	T1	NO	Normal	B0	G2	Stage I	KIDNEY
3	5106	K510601A	K510601A.htseq.txt	tumor	0	No	0	0				FALSE	TCGA-B0-5106	64	null	-23488	1657	2310	0	1657	1581	M0	NA	NA	MALE	Low	Kidney Clear Cell Renal Carcinoma	NA	8310/3	C64.9	YES	NA	NA	Left	N0	NO	0	0	NA	TUMOR FREE	Normal	NO	T1a	NO	Low	B0	G2	Stage I	KIDNEY
2	5107	K510701A	K510701A.htseq.txt	tumor	0	No	0	0				FALSE	TCGA-B0-5107	65	null	-23928	927	1299	0	927	910	M1	NA	NA	FEMALE	Low	Kidney Clear Cell Renal Carcinoma	NA	8310/3	C64.9	YES	NA	NA	Right	N0	NO	0	0	NA	WITH TUMOR	Normal	NO	T2	NO	Normal	B0	G3	Stage IV	KIDNEY
2	5108	K510801A	K510801A.htseq.txt	tumor	0	No	0	0				FALSE	TCGA-B0-5108	54	null	-19931	NA	504	0	162	162	M0	NA	NA	MALE	Low	Kidney Clear Cell Renal Carcinoma	NA	8310/3	C64.9	YES	NA	NA	Left	N0	NO	0	0	NA	TUMOR FREE	Low	NO	T3a	NO	Low	B0	G2	Stage III	KIDNEY
2	5109	K510901A	K510901A.htseq.txt	tumor	0	No	0	0				FALSE	TCGA-B0-5109	69	null	-25406	608	755	0	608	476	M0	NA	NA	MALE	Low	Kidney Clear Cell Renal Carcinoma	NA	8310/3	C64.9	YES	NA	NA	Left	N1	YES	NA	1	NA	WITH TUMOR	Elevated	NO	T4	NO	Normal	B0	G4	Stage IV	KIDNEY
1	5110	K511001A	K511001A.htseq.txt	tumor	0	No	0	0				FALSE	TCGA-B0-5110	71	null	-25936	NA	686	0	599	599	M0	NA	NA	FEMALE	Normal	Kidney Clear Cell Renal Carcinoma	NA	8310/3	C64.9	YES	NA	NA	Right	N0	NO	0	0	NA	TUMOR FREE	Normal	NO	T1a	NO	Normal	B0	G2	Stage I	KIDNEY
1	5113	K511301A	K511301A.htseq.txt	tumor	0	No	0	0				FALSE	TCGA-B0-5113	69	null	-25368	NA	212	0	22	22	M0	NA	NA	FEMALE	Low	Kidney Clear Cell Renal Carcinoma	NA	8310/3	C64.9	YES	NA	NA	Right	N0	YES	NA	0	NA	TUMOR FREE	Normal	NO	T3a	NO	Low	B0	G2	Stage III	KIDNEY
1	5115	K511501A	K511501A.htseq.txt	tumor	0	No	0	0				FALSE	TCGA-B0-5115	43	null	-15935	NA	404	0	90	90	M1	NA	NA	MALE	Normal	Kidney Clear Cell Renal Carcinoma	NA	8310/3	C64.9	YES	NA	NA	Left	N0	NO	0	0	NA	WITH TUMOR	Normal	NO	T2	NO	Normal	B0	G3	Stage III	KIDNEY
3	5116	K511601A	K511601A.htseq.txt	tumor	0	No	0	0				FALSE	TCGA-B0-5116	52	null	-19352	NA	239	0	103	103	M0	NA	NA	MALE	Normal	Kidney Clear Cell Renal Carcinoma	NA	8310/3	C64.9	YES	NA	NA	Right	N0	NO	0	0	NA	TUMOR FREE	Normal	NO	T3b	NO	Normal	B0	G3	Stage III	KIDNEY
3	5117	K511701A	K511701A.htseq.txt	tumor	0	No	0	0				FALSE	TCGA-B0-5117	40	null	-14612	NA	198	0	0	0	M0	NA	NA	MALE	Normal	Kidney Clear Cell Renal Carcinoma	NA	8310/3	C64.9	YES	NA	NA	Right	NX	NO	0	0	NA	TUMOR FREE	Normal	NO	T1b	NO	Normal	B0	G2	Stage I	KIDNEY
1	5119	K511901A	K511901A.htseq.txt	tumor	1	Yes	1	0	1	NOL9_TRNAU1AP	No	FALSE	TCGA-B0-5119	61	null	-22607	NA	228	0	48	48	M0	NA	NA	FEMALE	Normal	Kidney Clear Cell Renal Carcinoma	NA	8310/3	C64.9	YES	NA	NA	Right	N0	NO	0	0	NA	TUMOR FREE	Normal	NO	T1b	NO	Low	B0	G2	Stage I	KIDNEY
3	5120	K512001A	K512001A.htseq.txt	tumor	0	No	0	0				FALSE	TCGA-B0-5120	72	null	-26558	NA	218	0	55	55	M0	NA	NA	FEMALE	Normal	Kidney Clear Cell Renal Carcinoma	NA	8310/3	C64.9	YES	NA	NA	Left	N0	NO	0	0	NA	TUMOR FREE	Normal	NO	T1a	NO	Low	B0	G2	Stage I	KIDNEY
1	5121	K512101A	K512101A.htseq.txt	tumor	0	No	0	0				FALSE	TCGA-B0-5121	56	null	-20600	NA	220	0	220	220	M0	NA	NA	MALE	Low	Kidney Clear Cell Renal Carcinoma	NA	8310/3	C64.9	YES	NA	NA	Right	N0	NO	0	0	NA	TUMOR FREE	Low	NO	T1b	NO	Normal	B0	G2	Stage I	KIDNEY
2	5158	K515801A	K515801A.htseq.txt	tumor	0	No	0	0				FALSE	TCGA-B8-5158	56	null	-20764	NA	157	0	90	90	M0	NA	NA	MALE	Normal	Kidney Clear Cell Renal Carcinoma	NA	8310/3	C64.9	YES	NA	NA	Left	N1	YES	NA	1	NA	TUMOR FREE	Normal	NO	T3a	NO	Normal	B8	G4	Stage III	KIDNEY
1	5159	K515901A	K515901A.htseq.txt	tumor	0	No	0	0				FALSE	TCGA-B8-5159	61	null	-22461	NA	133	0	133	133	M0	NA	NA	FEMALE	Normal	Kidney Clear Cell Renal Carcinoma	NA	8310/3	C64.9	YES	NA	Normal	Right	N0	NO	NA	NA	NA	TUMOR FREE	Normal	NO	T1a	NO	Normal	B8	G3	Stage I	KIDNEY
2	5162	K516201A	K516201A.htseq.txt	tumor	0	No	0	0				FALSE	TCGA-B8-5162	62	null	-23008	NA	381	0	22	22	M0	NA	NA	MALE	Low	Kidney Clear Cell Renal Carcinoma	NA	8310/3	C64.9	YES	NA	NA	Left	NX	NO	NA	NA	NA	TUMOR FREE	Normal	YES	T2a	YES	NA	B8	G2	Stage II	KIDNEY
2	5163	K516301A	K516301A.htseq.txt	tumor	1	Yes	1	0	3	PIK3CB_KCNAB1	No	FALSE	TCGA-B8-5163	63	null	-23293	NA	210	0	4	4	M0	NA	NA	FEMALE	NA	Kidney Clear Cell Renal Carcinoma	NA	8310/3	C64.9	YES	NA	NA	Right	N0	NO	NA	NA	NA	NA	NA	NO	T3a	NO	NA	B8	G3	Stage III	KIDNEY
1	5164	K516401A	K516401A.htseq.txt	tumor	1	Yes	1	0	1	MTF1_SERINC2	No	FALSE	TCGA-B8-5164	65	null	-23863	NA	211	0	23	23	M0	NA	NA	MALE	NA	Kidney Clear Cell Renal Carcinoma	NA	8310/3	C64.9	YES	NA	NA	Right	N0	NO	NA	NA	NA	TUMOR FREE	NA	NO	T3a	NO	NA	B8	G3	Stage III	KIDNEY
3	5165	K516501A	K516501A.htseq.txt	tumor	0	No	0	0				FALSE	TCGA-B8-5165	43	null	-15898	NA	211	0	8	8	M0	NA	NA	MALE	Low	Kidney Clear Cell Renal Carcinoma	NA	8310/3	C64.9	YES	NA	NA	Right	N0	NO	NA	NA	NA	TUMOR FREE	Normal	NO	T1a	NO	Normal	B8	G2	Stage I	KIDNEY
1	5168	K516801A	K516801A.htseq.txt	tumor	0	No	0	0				FALSE	TCGA-BP-5168	76	null	-28025	1130	2635	0	1130	1122	M0	NA	NA	MALE	Low	Kidney Clear Cell Renal Carcinoma	NA	8310/3	C64.9	YES	NA	Elevated	Right	NX	NO	NA	NA	NA	TUMOR FREE	Normal	NO	T1a	YES	Low	BP	G2	Stage I	KIDNEY
2	5169	K516901A	K516901A.htseq.txt	tumor	0	No	0	0				FALSE	TCGA-BP-5169	69	null	-25257	NA	2917	0	550	1247	M0	NA	NA	MALE	Low	Kidney Clear Cell Renal Carcinoma	NA	8310/3	C64.9	YES	NA	NA	Left	N0	YES	NA	0	NA	TUMOR FREE	Normal	NO	T1b	NO	Low	BP	G2	Stage I	KIDNEY
2	5170	K517001A	K517001A.htseq.txt	tumor	0	No	0	0				FALSE	TCGA-BP-5170	55	null	-20229	NA	2557	0	2411	2411	M0	NA	NA	MALE	Normal	Kidney Clear Cell Renal Carcinoma	NA	8310/3	C64.9	YES	NA	NA	Right	NX	NO	NA	NA	NA	TUMOR FREE	Normal	NO	T1a	NO	Low	BP	G2	Stage I	KIDNEY
1	5173	K517301A	K517301A.htseq.txt	tumor	0	No	0	0				FALSE	TCGA-BP-5173	75	null	-27436	54	2412	0	54	29	M0	NA	NA	MALE	Low	Kidney Clear Cell Renal Carcinoma	NA	8310/3	C64.9	YES	NA	NA	Right	NX	NO	NA	NA	NA	TUMOR FREE	Normal	NO	T1a	NO	Low	BP	G2	Stage I	KIDNEY
3	5174	K517401A	K517401A.htseq.txt	tumor	0	No	0	0				FALSE	TCGA-BP-5174	45	null	-16692	NA	2330	0	2257	2291	M0	NA	NA	FEMALE	Low	Kidney Clear Cell Renal Carcinoma	NA	8310/3	C64.9	YES	NA	NA	Left	NX	NO	NA	NA	NA	TUMOR FREE	Normal	NO	T1a	NO	Low	BP	G2	Stage I	KIDNEY
2	5175	K517501A	K517501A.htseq.txt	tumor	4	Yes	4	0	5,5,5,5	EPB41L4A_ATG10,PAIP2_CDC25C,CLPTM1L_CDHR2,LPCAT1_DAP	No	FALSE	TCGA-BP-5175	60	null	-21949	NA	2311	0	932	932	M0	NA	NA	MALE	Low	Kidney Clear Cell Renal Carcinoma	NA	8310/3	C64.9	YES	NA	NA	Right	NX	NO	NA	NA	NA	NA	Normal	NO	T1a	NO	Low	BP	G3	Stage I	KIDNEY
1	5176	K517601A	K517601A.htseq.txt	tumor	0	No	0	0				FALSE	TCGA-BP-5176	78	null	-28726	1590	2310	0	1590	1498	M0	NA	NA	FEMALE	Normal	Kidney Clear Cell Renal Carcinoma	NA	8310/3	C64.9	YES	NA	NA	Left	NX	NO	NA	NA	NA	TUMOR FREE	Normal	NO	T1a	NO	Low	BP	G2	Stage I	KIDNEY
1	5177	K517701A	K517701A.htseq.txt	tumor	0	No	0	0				FALSE	TCGA-BP-5177	46	null	-17147	NA	2310	0	293	434	M0	NA	NA	FEMALE	Low	Kidney Clear Cell Renal Carcinoma	NA	8310/3	C64.9	YES	NA	Elevated	Right	NX	NO	NA	NA	NA	TUMOR FREE	Elevated	NO	T1a	NO	Low	BP	G3	Stage I	KIDNEY
2	5178	K517801A	K517801A.htseq.txt	tumor	0	No	0	0				FALSE	TCGA-BP-5178	71	null	-26070	1912	2300	0	1912	1779	M1	NA	NA	MALE	Low	Kidney Clear Cell Renal Carcinoma	NA	8310/3	C64.9	YES	NA	Elevated	Right	NX	YES	NA	0	NA	WITH TUMOR	Normal	NO	T3a	YES	Low	BP	G4	Stage IV	KIDNEY
3	5180	K518001A	K518001A.htseq.txt	tumor	0	No	0	0				FALSE	TCGA-BP-5180	53	null	-19413	NA	2254	0	1892	1892	M0	NA	NA	MALE	Low	Kidney Clear Cell Renal Carcinoma	NA	8310/3	C64.9	YES	NA	NA	Right	NX	NO	NA	NA	NA	TUMOR FREE	Normal	NO	T1a	NO	Low	BP	G2	Stage I	KIDNEY
1	5181	K518101A	K518101A.htseq.txt	tumor	0	No	0	0				FALSE	TCGA-BP-5181	58	null	-21514	NA	1546	0	1495	1495	M0	NA	NA	FEMALE	Low	Kidney Clear Cell Renal Carcinoma	NA	8310/3	C64.9	YES	NA	NA	Left	NX	NO	NA	NA	NA	TUMOR FREE	Low	NO	T1b	YES	Low	BP	G2	Stage I	KIDNEY
3	5182	K518201A	K518201A.htseq.txt	tumor	0	No	0	0				FALSE	TCGA-BP-5182	56	null	-20596	NA	1297	0	1165	1172	M0	NA	NA	MALE	Normal	Kidney Clear Cell Renal Carcinoma	NA	8310/3	C64.9	YES	NA	NA	Left	N0	YES	NA	0	NA	TUMOR FREE	Normal	NO	T1a	NO	Low	BP	G3	Stage I	KIDNEY
1	5183	K518301A	K518301A.htseq.txt	tumor	0	No	0	0				FALSE	TCGA-BP-5183	57	null	-20881	NA	1297	0	1102	1102	M0	NA	NA	MALE	Normal	Kidney Clear Cell Renal Carcinoma	NA	8310/3	C64.9	YES	NA	NA	Left	NX	NO	NA	NA	NA	TUMOR FREE	Low	NO	T3a	NO	Low	BP	G3	Stage III	KIDNEY
3	5187	K518701A	K518701A.htseq.txt	tumor	0	No	0	0				FALSE	TCGA-BP-5187	54	null	-19998	NA	1188	0	406	406	M0	NA	NA	MALE	Low	Kidney Clear Cell Renal Carcinoma	NA	8310/3	C64.9	YES	NA	NA	Right	NX	NO	NA	NA	NA	TUMOR FREE	Normal	NO	T1a	NO	Low	BP	G2	Stage I	KIDNEY
1	5190	K519001A	K519001A.htseq.txt	tumor	0	No	0	0				FALSE	TCGA-BP-5190	61	null	-22285	NA	1147	0	1010	1010	M0	NA	NA	MALE	Low	Kidney Clear Cell Renal Carcinoma	NA	8310/3	C64.9	YES	NA	NA	Right	NX	NO	NA	NA	NA	TUMOR FREE	Normal	NO	T1a	NO	Low	BP	G3	Stage I	KIDNEY
1	5192	K519201A	K519201A.htseq.txt	tumor	2	Yes	2	0	9.16	GLIS3_C9orf46,DDX19B_KCTD19	No	FALSE	TCGA-BP-5192	59	null	-21891	NA	1140	0	714	714	M0	NA	NA	MALE	Normal	Kidney Clear Cell Renal Carcinoma	NA	8310/3	C64.9	YES	NA	NA	Right	NX	NO	NA	NA	NA	TUMOR FREE	Low	NO	T1a	NO	Low	BP	G2	Stage I	KIDNEY
1	5194	K519401A	K519401A.htseq.txt	tumor	0	No	0	0				FALSE	TCGA-BP-5194	39	null	-14551	NA	1111	0	408	796	M0	NA	NA	MALE	Normal	Kidney Clear Cell Renal Carcinoma	NA	8310/3	C64.9	YES	NA	NA	Right	NX	NO	NA	NA	NA	TUMOR FREE	Normal	NO	T1a	NO	Low	BP	G2	Stage I	KIDNEY
3	5195	K519501A	K519501A.htseq.txt	tumor	1	Yes	1	0	3	ITPR1_SETMAR	No	FALSE	TCGA-BP-5195	75	null	-27547	NA	1071	0	748	748	M0	NA	NA	MALE	Low	Kidney Clear Cell Renal Carcinoma	NA	8310/3	C64.9	YES	NA	NA	Left	NX	NO	NA	NA	NA	TUMOR FREE	Normal	NO	T1a	NO	Low	BP	G2	Stage I	KIDNEY
2	5196	K519601A	K519601A.htseq.txt	tumor	2	Yes	2	0	2.2	FN1_ERBB4,FN1_WDSUB1	No	FALSE	TCGA-BP-5196	53	null	-19718	NA	1022	0	1018	1018	M0	NA	NA	MALE	Low	Kidney Clear Cell Renal Carcinoma	NA	8310/3	C64.9	YES	NA	NA	Left	NX	NO	NA	NA	NA	TUMOR FREE	Normal	NO	T1a	NO	Low	BP	G2	Stage I	KIDNEY
2	5198	K519801A	K519801A.htseq.txt	tumor	1	Yes	1	0	1	AGRN_CEP104	No	FALSE	TCGA-BP-5198	72	null	-26359	NA	991	0	603	603	M0	NA	Elevated	MALE	Low	Kidney Clear Cell Renal Carcinoma	NA	8310/3	C64.9	YES	NA	NA	Right	N0	YES	NA	0	NA	TUMOR FREE	Normal	NO	T3b	NO	Low	BP	G3	Stage III	KIDNEY
2	5199	K519901A	K519901A.htseq.txt	tumor	0	No	0	0				FALSE	TCGA-BP-5199	58	null	-21256	NA	1505	0	1354	1354	M0	NA	NA	MALE	Low	Kidney Clear Cell Renal Carcinoma	NA	8310/3	C64.9	YES	NA	NA	Left	N0	YES	NA	0	NA	TUMOR FREE	Normal	NO	T2	YES	Low	BP	G4	Stage II	KIDNEY
1	5200	K520001A	K520001A.htseq.txt	tumor	0	No	0	0				FALSE	TCGA-BP-5200	44	null	-16207	NA	967	0	870	870	M0	NA	NA	MALE	Low	Kidney Clear Cell Renal Carcinoma	NA	8310/3	C64.9	YES	NA	NA	Right	NX	NO	NA	NA	NA	TUMOR FREE	Normal	NO	T2	NO	Low	BP	G4	Stage II	KIDNEY
1	5201	K520101A	K520101A.htseq.txt	tumor	0	No	0	0				FALSE	TCGA-BP-5201	63	null	-23125	NA	972	0	951	951	M0	NA	NA	MALE	Low	Kidney Clear Cell Renal Carcinoma	NA	8310/3	C64.9	YES	NA	NA	Left	N0	YES	NA	0	NA	WITH TUMOR	Low	NO	T3b	YES	Low	BP	G4	Stage III	KIDNEY
1	5202	K520201A	K520201A.htseq.txt	tumor	0	No	0	0				FALSE	TCGA-BP-5202	75	null	-27555	NA	963	0	29	29	M0	NA	NA	MALE	Low	Kidney Clear Cell Renal Carcinoma	NA	8310/3	C64.9	YES	NA	NA	Right	NX	NO	NA	NA	NA	TUMOR FREE	Low	NO	T3a	NO	Low	BP	G2	Stage III	KIDNEY
1	5377	K537701A	K537701A.htseq.txt	tumor	1	Yes	0	1	19:05:00	TNFAIP8L1_SPEF2	No	FALSE	TCGA-B4-5377	68	null	-25115	NA	387	0	291	291	M1	1	Elevated	FEMALE	Low	Kidney Clear Cell Renal Carcinoma	NA	8310/3	C64.9	YES	90	Elevated	Right	N0	NO	NA	NA	NA	TUMOR FREE	Normal	NO	T3	NO	Normal	B4	G3	Stage IV	KIDNEY
3	5378	K537801A	K537801A.htseq.txt	tumor	0	No	0	0				FALSE	TCGA-B4-5378	62	null	-22980	NA	352	0	175	175	M0	1	Normal	MALE	Low	Kidney Clear Cell Renal Carcinoma	NA	8310/3	C64.9	YES	90	Normal	Right	N0	NO	NA	NA	NA	TUMOR FREE	Normal	NO	T1	NO	Normal	B4	G2	Stage I	KIDNEY
1	5399	K539901A	K539901A.htseq.txt	tumor	0	No	0	0				FALSE	TCGA-B0-5399	46	null	-17145	NA	251	0	190	190	M0	NA	NA	MALE	Low	Kidney Clear Cell Renal Carcinoma	NA	8310/3	C64.9	YES	NA	NA	Right	N0	NA	NA	NA	NA	TUMOR FREE	Normal	NO	T1b	NO	Low	B0	G2	Stage I	KIDNEY
2	5400	K540001A	K540001A.htseq.txt	tumor	1	Yes	1	0	8	NDRG1_ST3GAL1	No	FALSE	TCGA-B0-5400	59	null	-21819	NA	1022	0	677	677	M0	NA	NA	FEMALE	Low	Kidney Clear Cell Renal Carcinoma	NA	8310/3	C64.9	YES	NA	NA	Right	N0	NO	NA	NA	NA	TUMOR FREE	Elevated	NO	T3b	NO	Normal	B0	G4	Stage III	KIDNEY
3	5402	K540201A	K540201A.htseq.txt	tumor	0	No	0	0				FALSE	TCGA-B0-5402	64	null	-23477	NA	185	0	10	10	M0	NA	NA	MALE	Low	Kidney Clear Cell Renal Carcinoma	NA	8310/3	C64.9	YES	NA	NA	Left	NX	NO	NA	NA	NA	NA	Normal	NO	T3a	NO	Low	B0	G3	Stage IV	KIDNEY
1	5452	K545201A	K545201A.htseq.txt	tumor	1	Yes	0	1	01:09:00	PRKAB2_FBP2	No	FALSE	TCGA-CZ-5452	69	null	-25486	NA	1757	0	1556	1556	M0	0	NA	MALE	Normal	Kidney Clear Cell Renal Carcinoma	NA	8310/3	C64.9	YES	NA	NA	Right	N0	YES	NA	0	PREOPERATIVE	TUMOR FREE	Normal	NO	T2	NO	Normal	CZ	G2	Stage II	KIDNEY
1	5453	K545301A	K545301A.htseq.txt	tumor	0	No	0	0				FALSE	TCGA-CZ-5453	67	null	-24639	NA	1756	0	25	25	M0	NA	NA	MALE	Low	Kidney Clear Cell Renal Carcinoma	NA	8310/3	C64.9	YES	NA	NA	Left	NX	NO	0	NA	PREOPERATIVE	NA	Normal	NO	T2	NO	Low	CZ	G2	Stage II	KIDNEY
3	5454	K545401A	K545401A.htseq.txt	tumor	0	No	0	0				FALSE	TCGA-CZ-5454	63	null	-23083	722	1654	0	722	721	M1	1	NA	MALE	Low	Kidney Clear Cell Renal Carcinoma	NA	8310/3	C64.9	YES	NA	NA	Right	N0	YES	NA	0	PREOPERATIVE	WITH TUMOR	Low	NO	T2	NO	Normal	CZ	G2	Stage IV	KIDNEY
1	5455	K545501A	K545501A.htseq.txt	tumor	0	No	0	0				FALSE	TCGA-CZ-5455	63	null	-23150	561	1634	0	561	474	M1	1	NA	MALE	Low	Kidney Clear Cell Renal Carcinoma	NA	8310/3	C64.9	YES	NA	NA	Right	NX	NO	0	NA	PREOPERATIVE	WITH TUMOR	Normal	NO	T3b	NO	Low	CZ	G4	Stage IV	KIDNEY
1	5457	K545701A	K545701A.htseq.txt	tumor	0	No	0	0				FALSE	TCGA-CZ-5457	62	null	-22763	NA	1589	0	1547	1527	M0	NA	NA	MALE	Low	Kidney Clear Cell Renal Carcinoma	NA	8310/3	C64.9	YES	100	NA	Right	NX	NO	0	NA	PREOPERATIVE	WITH TUMOR	Normal	NO	T3a	NO	Low	CZ	G4	Stage III	KIDNEY
3	5458	K545801A	K545801A.htseq.txt	tumor	0	No	0	0				FALSE	TCGA-CZ-5458	43	null	-15790	NA	1575	0	1558	1558	M0	NA	NA	MALE	Low	Kidney Clear Cell Renal Carcinoma	NA	8310/3	C64.9	YES	NA	NA	Right	NX	NO	0	NA	PREOPERATIVE	TUMOR FREE	Normal	NO	T3	NO	Low	CZ	G3	Stage III	KIDNEY
1	5460	K546001A	K546001A.htseq.txt	tumor	0	No	0	0				FALSE	TCGA-CZ-5460	55	null	-20392	NA	1543	0	1430	1430	M1	NA	NA	MALE	Low	Kidney Clear Cell Renal Carcinoma	NA	8310/3	C64.9	YES	NA	NA	Right	NX	NO	0	NA	NA	WITH TUMOR	Normal	NO	T3b	NO	Low	CZ	G2	Stage IV	KIDNEY
3	5461	K546101A	K546101A.htseq.txt	tumor	0	No	0	0				FALSE	TCGA-CZ-5461	52	null	-19030	330	1540	0	330	316	M1	NA	NA	MALE	Low	Kidney Clear Cell Renal Carcinoma	NA	8310/3	C64.9	YES	NA	NA	Right	NX	NO	0	NA	PREOPERATIVE	WITH TUMOR	Normal	NO	T1b	NO	Low	CZ	G4	Stage IV	KIDNEY
2	5462	K546201A	K546201A.htseq.txt	tumor	0	No	0	0				FALSE	TCGA-CZ-5462	83	null	-30659	311	1523	0	311	218	M1	NA	NA	MALE	Low	Kidney Clear Cell Renal Carcinoma	NA	8310/3	C64.9	YES	NA	NA	Right	NX	NO	0	NA	PREOPERATIVE	WITH TUMOR	Normal	NO	T1b	NO	Low	CZ	G3	Stage IV	KIDNEY
1	5463	K546301A	K546301A.htseq.txt	tumor	0	No	0	0				FALSE	TCGA-CZ-5463	76	null	-27911	NA	1519	0	662	662	M0	NA	NA	MALE	NA	Kidney Clear Cell Renal Carcinoma	NA	8310/3	C64.9	YES	NA	NA	Left	NX	NO	0	NA	PREOPERATIVE	NA	NA	NO	T3a	NO	NA	CZ	G2	Stage III	KIDNEY
3	5464	K546401A	K546401A.htseq.txt	tumor	0	No	0	0				FALSE	TCGA-CZ-5464	69	null	-25463	NA	1495	0	1492	1492	M1	0	NA	MALE	Low	Kidney Clear Cell Renal Carcinoma	NA	8310/3	C64.9	YES	NA	NA	Left	NX	NO	0	NA	PREOPERATIVE	WITH TUMOR	Normal	NO	T3b	NO	NA	CZ	G2	Stage IV	KIDNEY
1	5465	K546501A	K546501A.htseq.txt	tumor	0	No	0	0				FALSE	TCGA-CZ-5465	76	null	-27837	NA	1443	0	1377	1377	M0	0	NA	FEMALE	Low	Kidney Clear Cell Renal Carcinoma	NA	8310/3	C64.9	YES	100	NA	Left	NX	NO	0	NA	PREOPERATIVE	TUMOR FREE	Normal	NO	T3b	NO	Low	CZ	G2	Stage III	KIDNEY
3	5467	K546701A	K546701A.htseq.txt	tumor	0	No	0	0				FALSE	TCGA-CZ-5467	86	null	-31473	73	1274	0	73	66	M0	NA	NA	FEMALE	Low	Kidney Clear Cell Renal Carcinoma	NA	8310/3	C64.9	YES	NA	NA	Right	N0	YES	NA	0	NA	WITH TUMOR	Normal	NO	T3a	NO	Low	CZ	G4	Stage III	KIDNEY
2	5468	K546801A	K546801A.htseq.txt	tumor	1	Yes	0	1	03:04:00	VHL_KIAA1430	No	FALSE	TCGA-CZ-5468	84	null	-30729	59	1242	0	59	45	M1	NA	NA	MALE	Low	Kidney Clear Cell Renal Carcinoma	NA	8310/3	C64.9	YES	NA	NA	Left	NX	NO	0	NA	NA	WITH TUMOR	Normal	NO	T3b	NO	Normal	CZ	G4	Stage IV	KIDNEY
2	5469	K546901A	K546901A.htseq.txt	tumor	0	No	0	0				FALSE	TCGA-CZ-5469	41	null	-15242	945	1199	0	945	931	M0	0	NA	MALE	Low	Kidney Clear Cell Renal Carcinoma	NA	8310/3	C64.9	YES	90	NA	Left	N0	YES	NA	0	PREOPERATIVE	WITH TUMOR	Normal	NO	T2	NO	Low	CZ	G2	Stage II	KIDNEY
1	5470	K547001A	K547001A.htseq.txt	tumor	0	No	0	0				FALSE	TCGA-CZ-5470	72	null	-26493	NA	1024	0	0	0	M0	NA	NA	FEMALE	Low	Kidney Clear Cell Renal Carcinoma	NA	8310/3	C64.9	YES	NA	NA	Left	N0	YES	NA	0	NA	NA	Normal	NO	T2	NO	Low	CZ	G3	Stage II	KIDNEY
3	5545	K554501A	K554501A.htseq.txt	tumor	0	No	0	0				FALSE	TCGA-B8-5545	42	null	-15376	NA	259	0	248	248	M0	NA	NA	MALE	Low	Kidney Clear Cell Renal Carcinoma	NA	8310/3	C64.9	YES	NA	NA	Left	N0	NO	NA	NA	NA	TUMOR FREE	Normal	NO	T1a	NO	NA	B8	G2	Stage I	KIDNEY
3	4756	K475601A	K475601A.htseq.txt	tumor	1	Yes	0	1	01:23:00	SFPQ_TFE3	Yes	TRUE	TCGA-BP-4756	62	null	-23004	NA	2655	0	370	370	M0	NA	NA	FEMALE	Normal	Kidney Clear Cell Renal Carcinoma	NA	8310/3	C64.9	YES	NA	NA	Right	N0	YES	NA	0	NA	TUMOR FREE	Normal	NO	T1b	NO	Low	BP	G2	Stage I	KIDNEY
3	5549	K554901A	K554901A.htseq.txt	tumor	0	No	0	0				FALSE	TCGA-B8-5549	53	null	-19560	NA	234	0	194	194	M0	NA	NA	MALE	Normal	Kidney Clear Cell Renal Carcinoma	NA	8310/3	C64.9	YES	NA	NA	Right	N0	NO	NA	NA	NA	TUMOR FREE	Normal	NO	T1b	NO	NA	B8	G3	Stage I	KIDNEY
3	5550	K555001A	K555001A.htseq.txt	tumor	0	No	0	0				FALSE	TCGA-B8-5550	71	null	-25937	NA	230	0	197	197	M0	NA	NA	MALE	Normal	Kidney Clear Cell Renal Carcinoma	NA	8310/3	C64.9	YES	NA	NA	Right	N0	YES	NA	0	NA	TUMOR FREE	Normal	NO	T3a	NO	Normal	B8	G3	Stage III	KIDNEY
2	5551	K555101A	K555101A.htseq.txt	tumor	1	Yes	0	1	17:01:00	GPATCH8_ZMYM4	No	FALSE	TCGA-B8-5551	65	null	-23976	NA	224	0	15	15	M0	NA	NA	FEMALE	Normal	Kidney Clear Cell Renal Carcinoma	NA	8310/3	C64.9	YES	NA	NA	Right	N0	NO	NA	NA	NA	TUMOR FREE	Normal	NO	T1b	NO	NA	B8	G3	Stage I	KIDNEY
3	5552	K555201B	K555201B.htseq.txt	tumor	0	No	0	0				FALSE	TCGA-B8-5552	41	null	-15218	NA	266	0	219	219	M0	NA	NA	FEMALE	Normal	Kidney Clear Cell Renal Carcinoma	NA	8310/3	C64.9	YES	NA	NA	Right	NX	NO	NA	NA	NA	TUMOR FREE	Normal	NO	T1b	NO	NA	B8	G2	Stage I	KIDNEY
1	5553	K555301A	K555301A.htseq.txt	tumor	0	No	0	0				FALSE	TCGA-B8-5553	67	null	-24729	NA	202	0	14	14	M0	NA	NA	FEMALE	Normal	Kidney Clear Cell Renal Carcinoma	NA	8310/3	C64.9	YES	NA	Normal	Left	N0	NO	NA	NA	NA	TUMOR FREE	Normal	NO	T1b	NO	NA	B8	G2	Stage I	KIDNEY
1	5565	K556501A	K556501A.htseq.txt	tumor	1	Yes	1	0	20	CSE1L_ARFGEF2	No	FALSE	TCGA-DV-5565	59	null	-21641	NA	1344	0	1329	1329	M0	1	NA	MALE	Normal	Kidney Clear Cell Renal Carcinoma	NA	8310/3	C64.9	YES	90	Elevated	Right	NX	NO	NA	NA	PREOPERATIVE	WITH TUMOR	Low	NO	T1a	YES	Normal	DV	G2	Stage I	KIDNEY
3	5566	K556601A	K556601A.htseq.txt	tumor	0	No	0	0				FALSE	TCGA-DV-5566	67	null	-24716	NA	1396	0	1398	1398	M0	0	NA	FEMALE	Normal	Kidney Clear Cell Renal Carcinoma	NA	8310/3	C64.9	YES	100	Normal	Right	NX	NO	NA	NA	PREOPERATIVE	WITH TUMOR	Normal	NO	T1a	YES	Normal	DV	G2	Stage I	KIDNEY
3	5567	K556701A	K556701A.htseq.txt	tumor	0	No	0	0				FALSE	TCGA-DV-5567	40	null	-14642	NA	1166	0	909	909	M0	0	NA	FEMALE	Low	Kidney Clear Cell Renal Carcinoma	NA	8310/3	C64.9	YES	100	Normal	Right	NX	NO	NA	NA	PREOPERATIVE	WITH TUMOR	Normal	NO	T1a	YES	Normal	DV	G2	Stage I	KIDNEY
3	5568	K556801A	K556801A.htseq.txt	tumor	0	No	0	0				FALSE	TCGA-DV-5568	26	null	-9713	NA	649	0	370	370	M0	0	NA	MALE	Low	Kidney Clear Cell Renal Carcinoma	NA	8310/3	C64.9	YES	100	Normal	Right	NX	NO	NA	NA	PREOPERATIVE	NA	Normal	YES	T1a	YES	Low	DV	G2	Stage I	KIDNEY
3	5569	K556901A	K556901A.htseq.txt	tumor	0	No	0	0				FALSE	TCGA-DV-5569	29	null	-10697	NA	640	0	355	355	M0	0	NA	FEMALE	Low	Kidney Clear Cell Renal Carcinoma	NA	8310/3	C64.9	YES	100	Elevated	Right	NX	NO	NA	NA	PREOPERATIVE	TUMOR FREE	Normal	NO	T1a	YES	Low	DV	G2	Stage I	KIDNEY
3	5573	K557301A	K557301A.htseq.txt	tumor	0	No	0	0				FALSE	TCGA-DV-5573	41	null	-15264	NA	1168	0	1130	1130	M0	0	NA	MALE	Low	Kidney Clear Cell Renal Carcinoma	NA	8310/3	C64.9	YES	100	Normal	Right	NX	NO	NA	NA	PREOPERATIVE	WITH TUMOR	Elevated	YES	T1a	YES	Normal	DV	G2	Stage I	KIDNEY
3	5574	K557401A	K557401A.htseq.txt	tumor	0	No	0	0				FALSE	TCGA-DV-5574	37	null	-13517	NA	974	0	723	723	M0	0	NA	MALE	Low	Kidney Clear Cell Renal Carcinoma	NA	8310/3	C64.9	YES	100	Normal	Right	NX	NO	NA	NA	PREOPERATIVE	WITH TUMOR	Normal	NO	T1a	YES	Normal	DV	G2	Stage I	KIDNEY
1	5575	K557501A	K557501A.htseq.txt	tumor	0	No	0	0				FALSE	TCGA-DV-5575	52	null	-19022	NA	1192	0	1005	1005	M0	0	NA	FEMALE	Low	Kidney Clear Cell Renal Carcinoma	NA	8310/3	C64.9	YES	100	Normal	Left	NX	NO	NA	NA	PREOPERATIVE	WITH TUMOR	Normal	NO	T1a	NO	Normal	DV	G2	Stage I	KIDNEY
3	5576	K557601A	K557601A.htseq.txt	tumor	2	Yes	1	1	7,1:9	RNF216_EIF2AK1,KIAA0319L_GOLGA1	No	FALSE	TCGA-DV-5576	55	null	-20310	727	1112	0	727	687	M0	0	NA	FEMALE	Low	Kidney Clear Cell Renal Carcinoma	NA	8310/3	C64.9	YES	100	Normal	Left	NX	NO	NA	NA	PREOPERATIVE	WITH TUMOR	Normal	NO	T1a	YES	Low	DV	G2	Stage I	KIDNEY
3	5580	K558001A	K558001A.htseq.txt	tumor	0	No	0	0				FALSE	TCGA-CW-5580	73	null	-26695	1964	2843	0	1964	NA	M1	1	NA	FEMALE	NA	Kidney Clear Cell Renal Carcinoma	NA	8310/3	C64.9	YES	NA	NA	Right	NX	NO	NA	NA	PREOPERATIVE	NA	NA	NO	T3a	NO	NA	CW	G3	Stage IV	KIDNEY
1	5581	K558101A	K558101A.htseq.txt	tumor	2	Yes	1	1	4,15:3	AASDH_CC2D2A,SMAD3_SLC9A9	Yes	FALSE	TCGA-CW-5581	44	null	-16194	NA	2918	0	2799	2799	M0	0	NA	MALE	NA	Kidney Clear Cell Renal Carcinoma	NA	8310/3	C64.9	YES	NA	NA	Right	NX	NO	NA	NA	PREOPERATIVE	TUMOR FREE	NA	NO	T1b	NO	NA	CW	G3	Stage I	KIDNEY
1	5583	K558301A	K558301A.htseq.txt	tumor	0	No	0	0				FALSE	TCGA-CW-5583	51	null	-18666	NA	2856	0	2489	2489	M0	2	NA	FEMALE	NA	Kidney Clear Cell Renal Carcinoma	NA	8310/3	C64.9	YES	NA	NA	Right	NX	NO	NA	NA	PREOPERATIVE	TUMOR FREE	NA	NO	T1a	NO	NA	CW	G2	Stage I	KIDNEY
1	5584	K558401A	K558401A.htseq.txt	tumor	1	Yes	0	1	17:01:00	ABCC3_BCAN	No	FALSE	TCGA-CW-5584	74	null	-27352	164	2763	0	164	NA	M0	0	NA	MALE	NA	Kidney Clear Cell Renal Carcinoma	NA	8310/3	C64.9	YES	NA	NA	Right	N1	YES	NA	2	PREOPERATIVE	NA	NA	NO	T3b	NO	NA	CW	G3	Stage III	KIDNEY
1	5585	K558501A	K558501A.htseq.txt	tumor	0	No	0	0				FALSE	TCGA-CW-5585	51	null	-18898	NA	2645	0	2609	2609	M1	0	NA	MALE	NA	Kidney Clear Cell Renal Carcinoma	NA	8310/3	C64.9	YES	NA	NA	Right	N0	YES	NA	0	PREOPERATIVE	WITH TUMOR	NA	NO	T3b	NO	NA	CW	G2	Stage IV	KIDNEY
1	5587	K558701A	K558701A.htseq.txt	tumor	0	No	0	0				FALSE	TCGA-CW-5587	62	null	-22693	NA	2633	0	2226	2226	M0	1	NA	FEMALE	NA	Kidney Clear Cell Renal Carcinoma	NA	8310/3	C64.9	YES	NA	NA	Left	N0	YES	NA	0	PREOPERATIVE	TUMOR FREE	NA	NO	T3b	NO	NA	CW	G2	Stage III	KIDNEY
3	5589	K558901A	K558901A.htseq.txt	tumor	1	Yes	0	1	01:05:00	DMGDH_NMNAT2	No	FALSE	TCGA-CW-5589	52	null	-19312	NA	2587	0	2377	2377	M0	0	NA	MALE	NA	Kidney Clear Cell Renal Carcinoma	NA	8310/3	C64.9	YES	NA	NA	Left	NX	NO	NA	NA	PREOPERATIVE	TUMOR FREE	NA	NO	T1a	NO	NA	CW	G2	Stage I	KIDNEY
3	5590	K559001A	K559001A.htseq.txt	tumor	0	No	0	0				FALSE	TCGA-CW-5590	51	null	-18905	1075	2552	0	1075	1067	M1	1	NA	MALE	NA	Kidney Clear Cell Renal Carcinoma	NA	8310/3	C64.9	YES	NA	NA	Right	NX	NO	NA	NA	PREOPERATIVE	NA	NA	NO	T3a	NO	NA	CW	G3	Stage IV	KIDNEY
3	5591	K559101A	K559101A.htseq.txt	tumor	0	No	0	0				FALSE	TCGA-CW-5591	56	null	-20712	NA	2549	0	2270	2270	M1	0	NA	MALE	NA	Kidney Clear Cell Renal Carcinoma	NA	8310/3	C64.9	YES	NA	NA	Right	N0	YES	NA	0	PREOPERATIVE	WITH TUMOR	NA	NO	T3a	NO	NA	CW	G2	Stage III	KIDNEY
3	5633	K563301A	K563301A.htseq.txt	tumor	0	No	0	0				FALSE	TCGA-B2-5633	56	null	-20492	NA	340	0	214	214	M0	NA	NA	FEMALE	Normal	Kidney Clear Cell Renal Carcinoma	NA	8310/3	C64.9	YES	NA	NA	Right	N0	NO	NA	NA	NA	TUMOR FREE	Low	NO	T1b	NO	NA	B2	G2	Stage I	KIDNEY
1	5635	K563501A	K563501A.htseq.txt	tumor	0	No	0	0				FALSE	TCGA-B2-5635	74	null	-27182	NA	319	0	315	315	M0	NA	NA	MALE	Normal	Kidney Clear Cell Renal Carcinoma	NA	8310/3	C64.9	YES	NA	NA	Right	NX	NO	NA	NA	NA	TUMOR FREE	Low	NO	T1a	YES	NA	B2	G2	Stage I	KIDNEY
3	5636	K563601A	K563601A.htseq.txt	tumor	0	No	0	0				FALSE	TCGA-B2-5636	79	null	-28900	NA	293	0	258	258	M0	NA	NA	MALE	Normal	Kidney Clear Cell Renal Carcinoma	NA	8310/3	C64.9	YES	NA	NA	Right	NX	NO	NA	NA	NA	TUMOR FREE	Normal	NO	T1a	NO	NA	B2	G2	Stage I	KIDNEY
1	5639	K563901A	K563901A.htseq.txt	tumor	0	No	0	0				FALSE	TCGA-B2-5639	46	null	-17102	NA	230	0	191	191	M0	NA	NA	MALE	Normal	Kidney Clear Cell Renal Carcinoma	NA	8310/3	C64.9	YES	70	NA	Left	NX	NO	NA	NA	NA	WITH TUMOR	Normal	YES	T3	NO	NA	B2	G3	Stage III	KIDNEY
3	5641	K564101A	K564101A.htseq.txt	tumor	0	No	0	0				FALSE	TCGA-B2-5641	79	null	-28953	NA	173	0	168	168	M0	NA	NA	MALE	Normal	Kidney Clear Cell Renal Carcinoma	NA	8310/3	C64.9	YES	NA	NA	Left	N0	NO	NA	NA	NA	TUMOR FREE	Normal	NO	T1a	NO	NA	B2	G3	Stage I	KIDNEY
2	5671	K567101A	K567101A.htseq.txt	tumor	0	No	0	0				FALSE	TCGA-CJ-5671	51	null	-18954	NA	2604	0	1942	2368	M0	0	NA	MALE	Normal	Kidney Clear Cell Renal Carcinoma	NA	8310/3	C64.9	YES	NA	Normal	Left	NX	NO	NA	NA	NA	TUMOR FREE	Normal	NO	T1a	NO	NA	CJ	G3	Stage I	KIDNEY
3	5672	K567201A	K567201A.htseq.txt	tumor	0	No	0	0				FALSE	TCGA-CJ-5672	84	null	-30900	2190	2603	0	2190	2189	M0	0	NA	MALE	Normal	Kidney Clear Cell Renal Carcinoma	NA	8310/3	C64.9	YES	NA	Normal	Left	NX	NO	NA	NA	NA	TUMOR FREE	Normal	NO	T1a	NO	NA	CJ	G3	Stage I	KIDNEY
1	5675	K567501A	K567501A.htseq.txt	tumor	0	No	0	0				FALSE	TCGA-CJ-5675	70	null	-25617	NA	2646	0	2429	2429	M0	0	NA	MALE	Normal	Kidney Clear Cell Renal Carcinoma	NA	8310/3	C64.9	YES	NA	Normal	Right	NX	NO	NA	NA	NA	WITH TUMOR	Normal	NO	T2a	NO	NA	CJ	G3	Stage II	KIDNEY
2	5676	K567601A	K567601A.htseq.txt	tumor	0	No	0	0				FALSE	TCGA-CJ-5676	47	null	-17170	NA	2634	0	2575	2575	M0	0	NA	MALE	Normal	Kidney Clear Cell Renal Carcinoma	NA	8310/3	C64.9	YES	NA	Normal	Right	NX	NO	NA	NA	NA	WITH TUMOR	Normal	NO	T3b	NO	NA	CJ	G3	Stage III	KIDNEY
2	5677	K567701A	K567701A.htseq.txt	tumor	1	Yes	1	0	14	STRN3_METTL3	No	FALSE	TCGA-CJ-5677	54	null	-19849	782	2633	0	782	782	M1	1	NA	FEMALE	Low	Kidney Clear Cell Renal Carcinoma	NA	8310/3	C64.9	YES	NA	Normal	Right	NX	NO	NA	NA	NA	WITH TUMOR	Normal	NO	T3a	NO	Normal	CJ	G4	Stage IV	KIDNEY
1	5678	K567801A	K567801A.htseq.txt	tumor	1	Yes	0	1	15:03:00	SMAD3_SLC9A9	Yes	FALSE	TCGA-CJ-5678	62	null	-22944	573	2684	0	573	573	M1	0	NA	MALE	Normal	Kidney Clear Cell Renal Carcinoma	NA	8310/3	C64.9	YES	NA	NA	Left	N0	NO	NA	NA	NA	WITH TUMOR	Normal	NO	T2b	NO	NA	CJ	G3	Stage IV	KIDNEY
2	5679	K567901A	K567901A.htseq.txt	tumor	0	No	0	0				FALSE	TCGA-CJ-5679	73	null	-26858	678	2719	0	678	678	M0	0	NA	MALE	Low	Kidney Clear Cell Renal Carcinoma	NA	8310/3	C64.9	YES	NA	Normal	Left	NX	NO	NA	NA	NA	WITH TUMOR	Normal	NO	T3b	NO	NA	CJ	G4	Stage III	KIDNEY
3	5680	K568001A	K568001A.htseq.txt	tumor	0	No	0	0				FALSE	TCGA-CJ-5680	65	null	-23778	768	2715	0	768	768	M1	0	NA	FEMALE	Normal	Kidney Clear Cell Renal Carcinoma	NA	8310/3	C64.9	YES	NA	Normal	Right	NX	NO	NA	NA	NA	WITH TUMOR	Normal	NO	T3a	NO	Normal	CJ	G4	Stage IV	KIDNEY
3	5546	K554601A	K554601A.htseq.txt	tumor	1	Yes	0	1	01:23:00	SFPQ_TFE3	Yes	TRUE	TCGA-B8-5546	38	null	-14112	NA	258	0	14	14	M0	NA	NA	FEMALE	Normal	Kidney Clear Cell Renal Carcinoma	NA	8310/3	C64.9	YES	NA	Elevated	Right	N0	NO	NA	NA	NA	TUMOR FREE	Normal	NO	T1b	NO	NA	B8	G2	Stage I	KIDNEY
3	5682	K568201A	K568201A.htseq.txt	tumor	0	No	0	0				FALSE	TCGA-CJ-5682	60	null	-22244	NA	2659	0	1883	1883	M1	0	NA	MALE	Normal	Kidney Clear Cell Renal Carcinoma	NA	8310/3	C64.9	YES	NA	Normal	Left	NX	NO	NA	NA	NA	WITH TUMOR	Normal	NO	T3a	NO	Normal	CJ	G4	Stage IV	KIDNEY
3	5683	K568301A	K568301A.htseq.txt	tumor	1	Yes	1	0	7	GLI3_C7orf10	No	FALSE	TCGA-CJ-5683	78	null	-28745	NA	2332	0	1889	1889	M0	0	NA	MALE	Low	Kidney Clear Cell Renal Carcinoma	NA	8310/3	C64.9	YES	NA	NA	Right	NX	NO	NA	NA	NA	TUMOR FREE	Normal	NO	T1b	NO	NA	CJ	G3	Stage I	KIDNEY
1	5684	K568401A	K568401A.htseq.txt	tumor	0	No	0	0				FALSE	TCGA-CJ-5684	61	null	-22561	NA	2246	0	2230	2230	M0	0	NA	MALE	Low	Kidney Clear Cell Renal Carcinoma	NA	8310/3	C64.9	YES	NA	NA	Right	NX	NO	NA	NA	NA	TUMOR FREE	NA	NO	T3a	NO	NA	CJ	G2	Stage III	KIDNEY
1	5686	K568601A	K568601A.htseq.txt	tumor	0	No	0	0				FALSE	TCGA-CJ-5686	59	null	-21836	NA	2110	0	2038	2038	M0	0	NA	FEMALE	Normal	Kidney Clear Cell Renal Carcinoma	NA	8310/3	C64.9	YES	NA	NA	Left	NX	NO	NA	NA	NA	TUMOR FREE	Normal	NO	T1b	NO	NA	CJ	G3	Stage I	KIDNEY
3	5689	K568901A	K568901A.htseq.txt	tumor	0	No	0	0				FALSE	TCGA-CJ-5689	90	null	-32872	1620	2192	0	6	1513	M0	NA	NA	MALE	Low	Kidney Clear Cell Renal Carcinoma	NA	8310/3	C64.9	YES	NA	NA	Left	NX	NO	NA	NA	NA	TUMOR FREE	Elevated	NO	T1b	YES	NA	CJ	G4	Stage I	KIDNEY
1	5690	K569001A	K569001A.htseq.txt	tumor	0	No	0	0				FALSE	TCGA-B0-5690	53	null	-19685	NA	2610	0	2180	2180	M0	NA	NA	FEMALE	Normal	Kidney Clear Cell Renal Carcinoma	NA	8310/3	C64.9	YES	NA	NA	Right	NX	NA	NA	NA	NA	TUMOR FREE	NA	NO	T1	NO	Normal	B0	G1	Stage I	KIDNEY
3	5691	K569101A	K569101A.htseq.txt	tumor	0	No	0	0				FALSE	TCGA-B0-5691	66	null	-24120	NA	3178	0	2781	2781	M0	NA	NA	FEMALE	Low	Kidney Clear Cell Renal Carcinoma	NA	8310/3	C64.9	YES	NA	NA	Left	N0	NA	NA	NA	NA	TUMOR FREE	Normal	NO	T1	YES	Low	B0	GX	Stage I	KIDNEY
1	5692	K569201A	K569201A.htseq.txt	tumor	2	Yes	2	0	22.16	TNRC6B_EP300,TXNDC11_LOC100128788	yes	FALSE	TCGA-B0-5692	66	null	-24139	NA	2555	0	1487	1487	M0	NA	NA	FEMALE	Normal	Kidney Clear Cell Renal Carcinoma	NA	8310/3	C64.9	YES	NA	NA	Right	N0	NA	NA	NA	NA	TUMOR FREE	Normal	NO	T3b	NO	Normal	B0	G3	Stage III	KIDNEY
1	5693	K569301A	K569301A.htseq.txt	tumor	0	No	0	0				FALSE	TCGA-B0-5693	47	null	-17177	NA	2701	0	1852	1852	M0	NA	NA	MALE	Normal	Kidney Clear Cell Renal Carcinoma	NA	8310/3	C64.9	YES	NA	NA	Right	NX	NA	NA	NA	NA	TUMOR FREE	Normal	NO	T1b	YES	Low	B0	G2	Stage I	KIDNEY
3	5694	K569401A	K569401A.htseq.txt	tumor	0	No	0	0				FALSE	TCGA-B0-5694	71	null	-26060	479	854	0	469	469	M0	NA	NA	MALE	Low	Kidney Clear Cell Renal Carcinoma	NA	8310/3	C64.9	YES	NA	NA	Left	N0	NA	NA	NA	NA	WITH TUMOR	Low	NO	T3a	YES	Low	B0	G3	Stage III	KIDNEY
3	5695	K569501A	K569501A.htseq.txt	tumor	0	No	0	0				FALSE	TCGA-B0-5695	61	null	-22320	NA	1254	0	1042	1042	M0	NA	NA	FEMALE	Normal	Kidney Clear Cell Renal Carcinoma	NA	8310/3	C64.9	YES	NA	NA	Left	N0	NO	NA	NA	NA	TUMOR FREE	Normal	NO	T1b	YES	Low	B0	G2	Stage I	KIDNEY
1	5696	K569601A	K569601A.htseq.txt	tumor	0	No	0	0				FALSE	TCGA-B0-5696	69	null	-25520	NA	1373	0	976	976	M0	NA	NA	MALE	Normal	Kidney Clear Cell Renal Carcinoma	NA	8310/3	C64.9	YES	NA	NA	Right	N0	NO	NA	NA	NA	TUMOR FREE	NA	NO	T3a	NO	Normal	B0	G4	Stage III	KIDNEY
3	5697	K569701A	K569701A.htseq.txt	tumor	0	No	0	0				FALSE	TCGA-B0-5697	50	null	-18445	NA	1484	0	1176	1176	M0	NA	NA	MALE	Normal	Kidney Clear Cell Renal Carcinoma	NA	8310/3	C64.9	YES	NA	NA	Right	N0	NA	NA	NA	NA	TUMOR FREE	Normal	NO	T1a	NO	Low	B0	G2	Stage I	KIDNEY
1	5698	K569801A	K569801A.htseq.txt	tumor	0	No	0	0				FALSE	TCGA-B0-5698	77	null	-28438	NA	2309	0	2181	2181	M0	NA	NA	MALE	Normal	Kidney Clear Cell Renal Carcinoma	NA	8310/3	C64.9	YES	NA	NA	Right	N0	NA	NA	NA	NA	NA	Normal	NO	T1b	YES	Low	B0	G3	Stage I	KIDNEY
1	5699	K569901A	K569901A.htseq.txt	tumor	0	No	0	0				FALSE	TCGA-B0-5699	53	null	-19647	NA	2673	0	2425	2425	M0	NA	NA	MALE	Normal	Kidney Clear Cell Renal Carcinoma	NA	8310/3	C64.9	YES	NA	NA	Left	N0	NO	NA	NA	NA	TUMOR FREE	Normal	NO	T1	NO	Low	B0	GX	Stage I	KIDNEY
3	5701	K570101A	K570101A.htseq.txt	tumor	1	Yes	1	0	2	GFPT1_NFU1	No	FALSE	TCGA-B0-5701	65	null	-23911	NA	1350	0	1280	1280	M0	NA	NA	MALE	Normal	Kidney Clear Cell Renal Carcinoma	NA	8310/3	C64.9	YES	NA	NA	Left	N0	YES	NA	0	NA	TUMOR FREE	Normal	NO	T3b	NO	Normal	B0	G4	Stage III	KIDNEY
1	5703	K570301A	K570301A.htseq.txt	tumor	0	No	0	0				FALSE	TCGA-B0-5703	73	null	-26855	NA	849	0	304	304	M0	NA	NA	MALE	Normal	Kidney Clear Cell Renal Carcinoma	NA	8310/3	C64.9	YES	NA	NA	Left	N0	NO	NA	NA	NA	TUMOR FREE	Low	NO	T1b	NO	Low	B0	G3	Stage I	KIDNEY
3	5681	K568101A	K568101A.htseq.txt	tumor	10	Yes	3	7	23,21:23,21:23,21:23,21:23,23,2,19:23,21:23,21:23	GABRA3_DIAPH2,PLAC1_DSCAM,C21orf90_GABRA3,HUNK_MAMLD1,NCRNA00189_ODZ1,DCX_PASD1,CRIM1_TACR1,KHSRP_TFE3,DIP2A_THOC2,TRAPPC10_ZCCHC16	Yes	TRUE	TCGA-CJ-5681	44	null	-16121	551	2712	0	551	551	M1	0	NA	FEMALE	Low	Kidney Clear Cell Renal Carcinoma	NA	8310/3	C64.9	YES	NA	Elevated	Left	NX	NO	NA	NA	NA	WITH TUMOR	Normal	NO	T3a	NO	NA	CJ	G3	Stage IV	KIDNEY
2	5706	K570601A	K570601A.htseq.txt	tumor	0	No	0	0				FALSE	TCGA-B0-5706	45	null	-16442	NA	2407	0	2414	2414	M0	NA	NA	MALE	Low	Kidney Clear Cell Renal Carcinoma	NA	8310/3	C64.9	YES	NA	NA	Left	N0	NO	NA	NA	NA	TUMOR FREE	Normal	NO	T2	NO	Normal	B0	G2	Stage II	KIDNEY
3	5709	K570901A	K570901A.htseq.txt	tumor	0	No	0	0				FALSE	TCGA-B0-5709	62	null	-22843	NA	2734	0	2357	2357	M0	NA	NA	FEMALE	Normal	Kidney Clear Cell Renal Carcinoma	NA	8310/3	C64.9	YES	NA	NA	Right	NX	NA	NA	NA	NA	TUMOR FREE	Normal	NO	T3a	NO	NA	B0	G3	Stage III	KIDNEY
1	5710	K571001A	K571001A.htseq.txt	tumor	0	No	0	0				FALSE	TCGA-B0-5710	57	null	-21168	NA	1103	0	957	957	M0	NA	NA	MALE	Normal	Kidney Clear Cell Renal Carcinoma	NA	8310/3	C64.9	YES	NA	NA	Right	N0	NA	NA	NA	NA	TUMOR FREE	Normal	NO	T1b	NO	Low	B0	G2	Stage I	KIDNEY
1	5711	K571101A	K571101A.htseq.txt	tumor	0	No	0	0				FALSE	TCGA-B0-5711	50	null	-18444	NA	2627	0	2553	2553	M0	NA	NA	MALE	Normal	Kidney Clear Cell Renal Carcinoma	NA	8310/3	C64.9	YES	NA	NA	Right	NX	NA	NA	NA	NA	TUMOR FREE	Normal	NO	T3b	NO	NA	B0	G3	Stage III	KIDNEY
1	5712	K571201A	K571201A.htseq.txt	tumor	1	Yes	1	0	3	LNP1_C3orf26	yes	FALSE	TCGA-B0-5712	68	null	-24988	NA	2379	0	2438	2438	M1	NA	NA	FEMALE	Low	Kidney Clear Cell Renal Carcinoma	NA	8310/3	C64.9	YES	NA	NA	Left	N0	NA	NA	NA	NA	NA	Normal	NO	T2	NO	Normal	B0	G3	Stage IV	KIDNEY
1	5713	K571301A	K571301A.htseq.txt	tumor	1	Yes	1	0	11	KDM2A_PACS1	No	FALSE	TCGA-B0-5713	75	null	-27644	NA	1901	0	1864	1864	M0	NA	NA	FEMALE	Normal	Kidney Clear Cell Renal Carcinoma	NA	8310/3	C64.9	YES	NA	NA	Left	N0	NA	NA	NA	NA	TUMOR FREE	Normal	NO	T3b	NO	Normal	B0	G3	Stage III	KIDNEY
1	5812	K581201A	K581201A.htseq.txt	tumor	0	No	0	0				FALSE	TCGA-B0-5812	53	null	-19533	NA	2803	0	2391	2391	M0	NA	NA	MALE	Low	Kidney Clear Cell Renal Carcinoma	NA	8310/3	C64.9	YES	NA	NA	Right	NX	NA	NA	NA	NA	TUMOR FREE	Normal	NO	T1b	YES	Low	B0	G3	Stage I	KIDNEY
2	5832	K583201A	K583201A.htseq.txt	tumor	1	Yes	1	0	10	LOC387647_LYZL1	No	FALSE	TCGA-B4-5832	65	null	-23806	NA	404	0	7	7	M0	1	Normal	MALE	Normal	Kidney Clear Cell Renal Carcinoma	NA	8310/3	C64.9	YES	80	NA	Left	N0	NO	NA	NA	PREOPERATIVE	TUMOR FREE	Normal	NO	T3b	NO	NA	B4	G2	Stage III	KIDNEY
1	5834	K583401A	K583401A.htseq.txt	tumor	0	No	0	0				FALSE	TCGA-B4-5834	59	null	-21712	NA	526	0	38	NA	M0	0	Normal	MALE	Normal	Kidney Clear Cell Renal Carcinoma	NA	8310/3	C64.9	YES	90	NA	Right	N0	NO	NA	NA	PREOPERATIVE	TUMOR FREE	Normal	NO	T1	NO	NA	B4	G1	Stage I	KIDNEY
3	5835	K583501A	K583501A.htseq.txt	tumor	0	No	0	0				FALSE	TCGA-B4-5835	64	null	-23407	NA	378	0	16	16	M0	0	Normal	FEMALE	Normal	Kidney Clear Cell Renal Carcinoma	NA	8310/3	C64.9	YES	100	NA	Left	N0	YES	NA	0	PREOPERATIVE	TUMOR FREE	Normal	NO	T1	NO	NA	B4	G2	Stage I	KIDNEY
1	5836	K583601A	K583601A.htseq.txt	tumor	0	No	0	0				FALSE	TCGA-B4-5836	61	null	-22340	NA	371	0	141	141	M0	1	Normal	FEMALE	Normal	Kidney Clear Cell Renal Carcinoma	NA	8310/3	C64.9	YES	90	NA	Right	N0	YES	NA	0	PREOPERATIVE	TUMOR FREE	Normal	NO	T1b	NO	NA	B4	G2	Stage I	KIDNEY
3	5838	K583801A	K583801A.htseq.txt	tumor	2	Yes	2	0	5.8	SPARC_ATOX1,NDRG1_ST3GAL1	No	FALSE	TCGA-B4-5838	52	null	-19242	NA	364	0	166	166	M0	1	Normal	MALE	Normal	Kidney Clear Cell Renal Carcinoma	NA	8310/3	C64.9	YES	80	NA	Left	N1	YES	NA	2	PREOPERATIVE	WITH TUMOR	Normal	NO	T3	NO	NA	B4	G2	Stage III	KIDNEY
1	5843	K584301A	K584301A.htseq.txt	tumor	0	No	0	0				FALSE	TCGA-B4-5843	45	null	-16779	NA	260	0	11	11	M0	1	Normal	MALE	Normal	Kidney Clear Cell Renal Carcinoma	NA	8310/3	C64.9	YES	90	NA	Right	N0	NO	NA	NA	PREOPERATIVE	TUMOR FREE	Normal	NO	T1	NO	NA	B4	G2	Stage I	KIDNEY
1	5844	K584401A	K584401A.htseq.txt	tumor	0	No	0	0				FALSE	TCGA-B4-5844	61	null	-22409	NA	252	0	7	7	M0	1	Normal	FEMALE	Normal	Kidney Clear Cell Renal Carcinoma	NA	8310/3	C64.9	YES	80	NA	Right	N0	NO	NA	NA	PREOPERATIVE	TUMOR FREE	Low	NO	T2	NO	NA	B4	G1	Stage II	KIDNEY
1	5982	K598201A	K598201A.htseq.txt	tumor	0	No	0	0				FALSE	TCGA-CZ-5982	59	null	-21591	NA	2126	0	2042	2043	M0	0	NA	FEMALE	NA	Kidney Clear Cell Renal Carcinoma	NA	8310/3	C64.9	YES	100	NA	Left	NX	NO	0	NA	NA	TUMOR FREE	NA	NO	T1a	NO	NA	CZ	G2	Stage I	KIDNEY
3	5984	K598401A	K598401A.htseq.txt	tumor	0	No	0	0				FALSE	TCGA-CZ-5984	51	null	-18775	NA	1959	0	1491	1491	M0	0	NA	MALE	Low	Kidney Clear Cell Renal Carcinoma	NA	8310/3	C64.9	YES	NA	NA	Left	N0	NO	0	NA	PREOPERATIVE	TUMOR FREE	Low	NO	T1b	NO	Normal	CZ	G3	Stage I	KIDNEY
3	5985	K598501A	K598501A.htseq.txt	tumor	0	No	0	0				FALSE	TCGA-CZ-5985	58	null	-21241	NA	1848	0	1629	1629	M0	0	NA	MALE	Low	Kidney Clear Cell Renal Carcinoma	NA	8310/3	C64.9	YES	NA	NA	Right	N0	YES	NA	0	PREOPERATIVE	TUMOR FREE	Normal	NO	T2	NO	Low	CZ	G2	Stage II	KIDNEY
1	5986	K598601A	K598601A.htseq.txt	tumor	0	No	0	0				FALSE	TCGA-CZ-5986	61	null	-22456	NA	1752	0	373	373	M0	0	NA	MALE	Low	Kidney Clear Cell Renal Carcinoma	NA	8310/3	C64.9	YES	NA	NA	Left	N0	YES	NA	0	PREOPERATIVE	TUMOR FREE	Normal	NO	T1	NO	Low	CZ	G3	Stage I	KIDNEY
3	5987	K598701A	K598701A.htseq.txt	tumor	0	No	0	0				FALSE	TCGA-CZ-5987	60	null	-21928	NA	1721	0	435	435	M1	NA	NA	MALE	Low	Kidney Clear Cell Renal Carcinoma	NA	8310/3	C64.9	YES	NA	NA	Right	NX	NO	0	NA	PREOPERATIVE	WITH TUMOR	Normal	NO	T3b	NO	Normal	CZ	G2	Stage IV	KIDNEY
3	5988	K598801A	K598801A.htseq.txt	tumor	0	No	0	0				FALSE	TCGA-CZ-5988	38	null	-14130	NA	1666	0	693	693	M0	0	NA	MALE	Low	Kidney Clear Cell Renal Carcinoma	NA	8310/3	C64.9	YES	NA	NA	Right	N0	NO	0	NA	PREOPERATIVE	TUMOR FREE	Normal	NO	T1b	NO	Low	CZ	G2	Stage I	KIDNEY
1	5989	K598901A	K598901A.htseq.txt	tumor	0	No	0	0				FALSE	TCGA-CZ-5989	60	null	-22169	NA	1661	0	1599	1599	M0	0	NA	MALE	Low	Kidney Clear Cell Renal Carcinoma	NA	8310/3	C64.9	YES	NA	NA	Right	N0	YES	NA	0	PREOPERATIVE	TUMOR FREE	Normal	NO	T2	NO	Low	CZ	G2	Stage II	KIDNEY
2	6027	K602701A	K602701A.htseq.txt	tumor	0	No	0	0				FALSE	TCGA-CJ-6027	77	null	-28358	NA	2850	0	1855	NA	M0	0	NA	MALE	Low	Kidney Clear Cell Renal Carcinoma	NA	8310/3	C64.9	YES	NA	Normal	Right	NX	NO	NA	NA	NA	TUMOR FREE	Normal	NO	T1a	YES	NA	CJ	G4	Stage I	KIDNEY
2	6028	K602801A	K602801A.htseq.txt	tumor	0	No	0	0				FALSE	TCGA-CJ-6028	58	null	-21380	1625	2817	0	NA	NA	M1	0	NA	MALE	Low	Kidney Clear Cell Renal Carcinoma	NA	8310/3	C64.9	YES	NA	Normal	Left	NX	NA	NA	NA	NA	WITH TUMOR	Normal	NO	T3a	NO	Elevated	CJ	G4	Stage IV	KIDNEY
3	6030	K603001A	K603001A.htseq.txt	tumor	0	No	0	0				FALSE	TCGA-CJ-6030	65	null	-24096	2298	2771	0	NA	NA	M0	0	NA	MALE	Low	Kidney Clear Cell Renal Carcinoma	NA	8310/3	C64.9	YES	NA	NA	Left	N0	YES	NA	0	NA	TUMOR FREE	Normal	NO	T1a	YES	NA	CJ	G3	Stage I	KIDNEY
3	6031	K603101A	K603101A.htseq.txt	tumor	0	No	0	0				FALSE	TCGA-CJ-6031	54	null	-19905	NA	2778	0	1905	NA	M0	0	NA	MALE	Normal	Kidney Clear Cell Renal Carcinoma	NA	8310/3	C64.9	YES	NA	Normal	Right	NX	NO	NA	NA	NA	TUMOR FREE	Normal	NO	T1b	NO	NA	CJ	G3	Stage I	KIDNEY
1	6032	K603201A	K603201A.htseq.txt	tumor	0	No	0	0				FALSE	TCGA-CJ-6032	63	null	-23310	NA	2639	0	2548	NA	M0	0	NA	FEMALE	Normal	Kidney Clear Cell Renal Carcinoma	NA	8310/3	C64.9	YES	NA	Normal	Right	NX	NO	NA	NA	NA	TUMOR FREE	Normal	NO	T2	NO	NA	CJ	G3	Stage II	KIDNEY
2	6033	K603301A	K603301A.htseq.txt	tumor	0	No	0	0				FALSE	TCGA-CJ-6033	54	null	-19918	224	2637	0	NA	NA	M1	1	NA	FEMALE	Low	Kidney Clear Cell Renal Carcinoma	NA	8310/3	C64.9	YES	NA	NA	Right	N0	NO	NA	NA	NA	WITH TUMOR	Elevated	NO	T3a	NO	Elevated	CJ	G4	Stage IV	KIDNEY
2	6087	K608701A	K608701A.htseq.txt	tumor	1	Yes	0	1	15:20:00	SMAD3_DLGAP4	No	FALSE	TCGA-CW-6087	61	null	-22437	41	2917	0	41	41	M1	1	NA	MALE	NA	Kidney Clear Cell Renal Carcinoma	NA	8310/3	C64.9	YES	NA	NA	Right	N1	YES	NA	1	PREOPERATIVE	TUMOR FREE	NA	NO	T3a	NO	NA	CW	G4	Stage IV	KIDNEY
1	6088	K608801A	K608801A.htseq.txt	tumor	0	No	0	0				FALSE	TCGA-CW-6088	60	null	-22020	NA	2822	0	2311	2311	M0	1	NA	MALE	NA	Kidney Clear Cell Renal Carcinoma	NA	8310/3	C64.9	YES	NA	NA	Right	N0	YES	NA	0	PREOPERATIVE	TUMOR FREE	NA	NO	T1b	NO	NA	CW	G2	Stage I	KIDNEY
2	6090	K609001A	K609001A.htseq.txt	tumor	0	No	0	0				FALSE	TCGA-CW-6090	68	null	-24909	NA	2786	0	2308	2308	M0	0	NA	MALE	NA	Kidney Clear Cell Renal Carcinoma	NA	8310/3	C64.9	YES	NA	NA	Right	NX	NO	NA	NA	PREOPERATIVE	TUMOR FREE	NA	NO	T1b	NO	NA	CW	G3	Stage I	KIDNEY
1	6093	K609301A	K609301A.htseq.txt	tumor	0	No	0	0				FALSE	TCGA-CW-6093	73	null	-26909	NA	2664	0	2430	2430	M0	2	NA	MALE	NA	Kidney Clear Cell Renal Carcinoma	NA	8310/3	C64.9	YES	NA	NA	Right	NX	NO	NA	NA	PREOPERATIVE	TUMOR FREE	NA	NO	T1a	YES	NA	CW	G1	Stage I	KIDNEY
3	6097	K609701A	K609701A.htseq.txt	tumor	0	No	0	0				FALSE	TCGA-CW-6097	32	null	-11701	570	2619	0	570	570	M0	0	NA	MALE	NA	Kidney Clear Cell Renal Carcinoma	NA	8310/3	C64.9	YES	NA	NA	Left	NX	NO	NA	NA	PREOPERATIVE	WITH TUMOR	NA	NO	T3a	NO	NA	CW	G4	Stage III	KIDNEY
[truncated: 6 more columns]
